# Supplementary material for: Cooperative interactions facilitate stimulation of Rad51 by the Swi5-Sfr1 auxiliary factor complex
Source: eLife. 2020 Mar 24;9:e52566. doi: 10.7554/eLife.52566 (PMC7093153; doi:10.7554/eLife.52566)
Supplement: Figure 1—source data 1. — Survival (%) following UV irradiation for data in Figure 1D. [file elife-52566-fig1-data1.xlsx]

## Sheet: Source_1C
	Replicate 1					Replicate 2					Replicate 3					AVERAGE					SD
	% yield N	% yield C	% yield N + C	Conc S5S1		% yield N	% yield C	% yield N + C	Conc S5S1		% yield N	% yield C	% yield N + C	Conc S5S1		% yield N	% yield C	% yield N + C	Conc S5S1
	3.56416			0		3.43324			0		3.85117			0		3.61619			0		0.213768
	3.51125			0.25		3.54629			0.25		3.30929			0.25		3.45561			0.25		0.127921
	3.35623			0.5		3.42343			0.5		4.05843			0.5		3.61269			0.5		0.387479
	3.266			2		3.36765			2		4.02372			2		3.55246			2		0.411275
	3.3926			5		3.90864			5		4.00661			5		3.76928			5		0.329872
	3.18034			10		3.92139			10		3.69695			10		3.59956			10		0.380006
		3.56416		0			3.43324		0			3.85117		0			3.61619		0		0.213768
		3.62187		0.25			5.00623		0.25			4.46172		0.25			4.36327		0.25		0.697414
		6.7757		0.5			8.30566		0.5			8.19168		0.5			7.75768		0.5		0.852326
		29.5468		2			30.0159		2			30.8741		2			30.1456		2		0.673064
		38.9468		5			37.4847		5			40.6266		5			39.0194		5		1.5722
		42.9534		10			43.4839		10			42.5951		10			43.0108		10		0.447179
			3.56416	0				3.43324	0				3.85117	0				3.61619	0		0.213768
			3.28064	0.25				3.95008	0.25				3.77891	0.25				3.66988	0.25		0.347786
			5.75091	0.5				7.05421	0.5				5.67087	0.5				6.15866	0.5		0.7766
			24.733	2				25.8178	2				18.3629	2				22.9712	2		4.0276
			33.286	5				34.5364	5				36.6449	5				34.8224	5		1.6976
			34.1061	10				35.8088	10				36.2441	10				35.3864	10		1.12987
	WT	33.3246				WT	41.4838				WT	33.3246				WT	36.0443				4.71067

## Sheet: Source_1D
			# of colonies			100% survival			Survival %			Survival % average		SD
Genotype	UV dose (J/m2)	cells plated	-1	-2	-3	-1	-2	-3	-1	-2	-3
WT	0	200	246	248	160	246	248	160	100	100	100	100	sfr1+	0	0
	60	400	263	274	143	492	496	320	53.4553	55.2419	44.6875	51.1282		5.64893	60
	120	1000	224	196	211	984	992	800	22.7642	19.7581	26.375	22.9658		3.31307	120
	180	3000	332	290	60	4920	4960	2400	6.74797	5.84677	2.5	5.03158		2.23824	180
sfr1d	0	200	295	325	259	295	325	259	100	100	100	100	sfr1d	0
	60	400	321	299	180	590	650	518	54.4068	46	34.749	45.0519		9.86311
	120	5000	403	491	93	11800	13000	6475	3.41525	3.77692	1.43629	2.87616		1.26
	180	20000	15	13	15	11800	13000	25900	0.127119	0.1	0.0579151	0.0950112		0.0348705
sfr1N	0	200	230	214	217	230	214	217	100	100	100	100	sfr1N	0
	60	400	263	187	273	460	428	434	57.1739	43.6916	62.9032	54.5896		9.86311
	120	5000	194	75	272	5750	5350	5425	3.37391	1.40187	5.01382	3.2632		1.80852
	180	20000	35	40	13	23000	21400	21700	0.152174	0.186916	0.0599078	0.132999		0.0656393
sfr1C	0	200	213	244	201	213	244	201	100	100	100	100	sfr1C	0
	60	400	265	279	214	426	488	402	62.2066	57.1721	53.2338	57.5375		4.49752
	120	5000	257	350	301	5325	6100	5025	4.82629	5.7377	5.99005	5.51802		0.612194
	180	20000	37	68	30	21300	24400	20100	0.173709	0.278689	0.149254	0.20055		0.0687655
