# Supplementary material for: Cooperative interactions facilitate stimulation of Rad51 by the Swi5-Sfr1 auxiliary factor complex
Source: eLife. 2020 Mar 24;9:e52566. doi: 10.7554/eLife.52566 (PMC7093153; doi:10.7554/eLife.52566)
Supplement: Figure 5—source data 1. [file elife-52566-fig5-data1.xlsx]

## Sheet: Source_5D
	Replicate 1				Replicate 2				Replicate 3				AVERAGE				SD
	% yield WT	% yield 7A	Conc S5S1		% yield WT	% yield 7A	Conc S5S1		% yield WT	% yield 7A	Conc S5S1		% yield WT	% yield 7A	Conc S5S1
	2.8585		0		3.15313		0		1.3716		0		2.46108		0		0.954948
	49.0834		0.25		43.0742		0.25		48.8535		0.25		47.0037		0.25		3.40497
	48.3602		0.5		41.773		0.5		48.5217		0.5		46.2183		0.5		3.85059
	40.0217		1		37.0926		1		44.8649		1		40.6597		1		3.92527
	34.4939		2		27.6722		2		32.8419		2		31.6694		2		3.55879
	27.6633		3		21.4358		3		27.7487		3		25.616		3		3.62034
	18.2102		5		15.6948		5		15.641		5		16.5153		5		1.46807
	10.9666		10		9.10211		10		8.92211		10		9.66362		10		1.13203
		2.8585	0			3.15313	0			1.3716	0			2.46108	0		0.954948
		14.5104	0.25			9.79498	0.25			5.8588	0.25			10.0547	0.25		4.33164
		27.7026	0.5			18.3776	0.5			22.5913	0.5			22.8905	0.5		4.6697
		39.8061	1			30.2369	1			35.4764	1			35.1731	1		4.7918
		43.6193	2			36.5719	2			42.1675	2			40.7862	2		3.72123
		45.7811	3			41.598	3			44.2361	3			43.8717	3		2.11524
		45.6496	5			43.1209	5			45.729	5			44.8332	5		1.48341
		39.7818	10			41.7837	10			38.8822	10			40.1492	10		1.4852
	Replicate 1				Replicate 2				Replicate 3				AVERAGE				SD
	% yield 3A	% yield 4A	Conc S5S1		% yield 3A	% yield 4A	Conc S5S1		% yield 3A	% yield 4A	Conc S5S1		% yield 3A	% yield 4A	Conc S5S1
	3.49059		0		2.84984		0		2.73289		0		3.02444		0		0.407912
	41.2039		0.25		40.8096		0.25		35.3853		0.25		39.1329		0.25		3.25155
	41.7735		0.5		41.4551		0.5		42.0417		0.5		41.7568		0.5		0.293641
	42.9201		1		41.1388		1		39.1027		1		41.0539		1		1.91014
	39.0505		2		39.4586		2		38.7883		2		39.0991		2		0.337798
	37.5416		3		37.9441		3		36.0999		3		37.1952		3		0.969661
	29.5598		5		26.5978		5		29.5295		5		28.5624		5		1.70142
	20.9214		10		23.4784		10		21.3803		10		21.9267		10		1.36328
		3.49059	0			2.84984	0			2.73289	0			3.02444	0		0.407912
		33.8936	0.25			34.6973	0.25			29.5048	0.25			32.6985	0.25		2.79491
		39.2898	0.5			37.6302	0.5			37.0532	0.5			37.991	0.5		1.16114
		37.6527	1			39.5596	1			38.6637	1			38.6253	1		0.953999
		37.8438	2			37.7718	2			36.0185	2			37.2114	2		1.03367
		37.3761	3			37.5723	3			33.1517	3			36.0334	3		2.4975
		29.78	5			29.0076	5			27.4417	5			28.7431	5		1.19142
		21.1733	10			22.3575	10			19.7882	10			21.1063	10		1.28594

## Sheet: Source_5E
	Replicate 1				Replicate 2				Replicate 3				AVERAGE				SD
	% JM WT	% JM 7A	Conc S5S1		% JM WT	% JM 7A	Conc S5S1		% JM WT	% JM 7A	Conc S5S1		% JM WT	% JM 7A	Conc S5S1
	0.687567		0		1.19244		0		1.3716		0		1.08387		0		0.354703
	27.3662		0.25		24.2091		0.25		28.7444		0.25		26.7732		0.25		2.32506
	25.6214		0.5		21.749		0.5		26.1576		0.5		24.5093		0.5		2.40551
	25.0568		1		20.9133		1		26.0277		1		23.9993		1		2.71626
	24.5473		2		19.588		2		24.1079		2		22.7477		2		2.74518
	22.0944		3		17.0201		3		22.9218		3		20.6788		3		3.19537
	15.4438		5		13.0887		5		15.0454		5		14.526		5		1.26051
	8.82935		10		7.18845		10		9.30739		10		8.44173		10		1.11138
		0.687567	0			1.19244	0			1.3716	0			1.08387	0		0.354703
		12.2318	0.25			7.79692	0.25			5.8588	0.25			8.62916	0.25		3.26698
		24.5118	0.5			16.029	0.5			20.5948	0.5			20.3785	0.5		4.24553
		31.3524	1			24.3436	1			28.057	1			27.9177	1		3.5065
		29.3823	2			25.3787	2			29.518	2			28.093	2		2.35164
		29.6425	3			26.879	3			28.8677	3			28.4631	3		1.42545
		26.5727	5			24.9145	5			26.6949	5			26.0607	5		0.994515
		21.7904	10			23.9894	10			21.5684	10			22.4494	10		1.3383
	Replicate 1				Replicate 2				Replicate 3				AVERAGE				SD
	% JM 3A	% JM 4A	Conc S5S1		% JM 3A	% JM 4A	Conc S5S1		% JM 3A	% JM 4A	Conc S5S1		% JM 3A	% JM 4A	Conc S5S1
	1.27411		0		0.799005		0		1.05043		0		1.04118		0		0.237689
	23.9768		0.25		23.5256		0.25		23.0966		0.25		23.533		0.25		0.440155
	20.7684		0.5		21.8695		0.5		23.9347		0.5		22.1909		0.5		1.60745
	21.3562		1		21.0513		1		22.9026		1		21.77		1		0.992631
	19.8647		2		19.4213		2		21.031		2		20.1057		2		0.831495
	19.2214		3		19.2452		3		20.1129		3		19.5265		3		0.50796
	17.709		5		15.6154		5		18.2395		5		17.188		5		1.38749
	16.9757		10		17.3099		10		17.3		10		17.1952		10		0.190151
		1.27411	0			0.799005	0			1.05043	0			1.04118	0		0.237689
		22.9809	0.25			23.5349	0.25			22.489	0.25			5.8588	0.25		0.523248
		22.931	0.5			21.6083	0.5			23.9424	0.5			20.5948	0.5		1.1705
		22.2064	1			22.6159	1			21.9231	1			28.057	1		0.348349
		19.7593	2			20.5452	2			20.767	2			29.518	2		0.529497
		21.7084	3			20.6603	3			19.8936	3			28.8677	3		0.91102
		18.9768	5			18.8145	5			18.0328	5			26.6949	5		0.504728
		15.6931	10			15.5952	10			15.1181	10			21.5684	10		0.307617

## Sheet: Source_5F
	Replicate 1				Replicate 2				Replicate 3				AVERAGE				SD
	% NC WT	% NC 7A	Conc S5S1		% NC WT	% NC 7A	Conc S5S1		% NC WT	% NC 7A	Conc S5S1		% NC WT	% NC 7A	Conc S5S1
	2.17093		0		1.96069		0		0		0		1.37721		0		1.19732
	21.7172		0.25		18.8651		0.25		20.1091		0.25		20.2305		0.25		1.42991
	22.7388		0.5		20.024		0.5		22.3641		0.5		21.7089		0.5		1.4712
	14.9649		1		16.1792		1		18.8372		1		16.6604		1		1.98052
	9.94664		2		8.08421		2		8.73406		2		8.92164		2		0.945277
	5.56892		3		4.41571		3		4.82694		3		4.93719		3		0.584457
	2.76644		5		2.6061		5		0.595604		5		1.98938		5		1.20971
	2.13729		10		1.91367		10		-0.38528		10		1.22189		10		1.39633
		2.17093	0			1.96069	0			0	0			1.37721	0		1.19732
		2.27863	0.25			1.99807	0.25			0	0.25			1.42557	0.25		1.24252
		3.19083	0.5			2.34861	0.5			1.99648	0.5			2.51197	0.5		0.613705
		8.45371	1			5.89336	1			7.41935	1			7.25547	1		1.28802
		14.237	2			11.1932	2			12.6495	2			12.6932	2		1.52237
		16.1387	3			14.7189	3			15.3684	3			15.4087	3		0.710722
		19.0769	5			18.2064	5			19.0342	5			18.7725	5		0.49071
		17.9914	10			17.7942	10			17.3138	10			17.6998	10		0.348556
	Replicate 1				Replicate 2				Replicate 3				AVERAGE				SD
	% NC 3A	% NC 4A	Conc S5S1		% NC 3A	% NC 4A	Conc S5S1		% NC 3A	% NC 4A	Conc S5S1		% NC 3A	% NC 4A	Conc S5S1
	2.21648		0		2.05084		0		1.68246		0		1.98326		0		0.273346
	17.2271		0.25		17.284		0.25		12.2886		0.25		15.5999		0.25		2.86778
	21.0051		0.5		19.5857		0.5		18.107		0.5		19.5659		0.5		1.44918
	21.564		1		20.0875		1		16.2		1		19.2838		1		2.7708
	19.1857		2		20.0373		2		17.7572		2		18.9934		2		1.15215
	18.3202		3		18.6989		3		15.9871		3		17.6687		3		1.46862
	11.8508		5		10.9824		5		11.29		5		11.3744		5		0.440317
	3.94565		10		6.16851		10		4.08029		10		4.73148		10		1.24632
		2.21648	0			2.05084	0			1.68246	0			1.98326	0		0.273346
		10.9127	0.25			11.1624	0.25			7.01577	0.25			9.69693	0.25		2.32531
		16.3588	0.5			16.0219	0.5			13.1108	0.5			15.1638	0.5		1.78594
		15.4463	1			16.9436	1			16.7407	1			16.3769	1		0.812253
		18.0844	2			17.2266	2			15.2515	2			16.8542	2		1.45274
		15.6677	3			16.912	3			13.2581	3			15.2792	3		1.85765
		10.8032	5			10.1931	5			9.40884	5			10.1351	5		0.699002
		5.48023	10			6.7623	10			4.67011	10			5.63755	10		1.05493
