# Supplementary material for: Cooperative interactions facilitate stimulation of Rad51 by the Swi5-Sfr1 auxiliary factor complex
Source: eLife. 2020 Mar 24;9:e52566. doi: 10.7554/eLife.52566 (PMC7093153; doi:10.7554/eLife.52566)
Supplement: Figure 6—figure supplement 1—source data 1. [file elife-52566-fig6-figsupp1-data1.xlsx]

## Sheet: Source_Fig6_S1B
		Unbound % relative to no protein			Average	Stdev				Unbound % relative to no protein			Average	Stdev
		css 1	css 2	css 3						lds1	lds 2	lds 3
none band	0	100	100	100	100	0		none band	0	100	100	100	100	0
WT lane	0.5	3.60514	12.702	4.80789	7.03835	4.94162		WT lane	0.5	78.4397	49.6065	58.9276	62.3246	14.7137
	1	0	0	0	0	0			1	0	0.229484	0	0.0764946	0.132492
	2	0	0	0	0	0			2	0	0	0	0	0
	4	0	0	0	0	0			4	0	0	0	0	0
7A lane	0.5	89.5555	103.108	93.1773	95.2803	7.01667		7A lane	0.5	93.2548	93.9147	63.974	83.7145	17.0989
	1	103.832	111.921	95.6683	103.807	8.12623			1	98.0929	101.194	65.8203	88.3691	19.5894
	2	99.7913	122.144	95.8142	105.916	14.1934			2	97.7333	105.832	67.7916	90.4524	20.0382
	4	98.6156	117.297	98.3058	104.739	10.876			4	99.2983	98.0815	67.7197	88.3665	17.891
3A lane	0.5	61.1826	77.2122	85.8935	74.7628	12.5362		3A lane	0.5	89.7988	68.6362	62.9192	73.7847	14.1601
	1	16.5335	26.8791	28.1061	23.8396	6.3569			1	41.7439	13.9152	55.1126	36.9239	21.0174
	2	0	0.435616	1.32581	0.587142	0.675769			2	0	0	0	0	0
	4	0	0	0	0	0			4	0	0	0	0	0
4A lane	0.5	72.9862	89.6294	88.5634	83.7263	9.31648		4A lane	0.5	93.4386	91.5857	66.6793	83.9012	14.9434
	1	58.8986	67.9876	72.4843	66.4568	6.921			1	83.355	63.0847	69.2817	71.9071	10.387
	2	24.4997	28.5797	30.9336	28.0044	3.25531			2	19.3192	0.933117	22.2335	14.1619	11.5488
	4	5.18939	5.01589	6.08313	5.42947	0.572696			4	0	0	0	0	0
		average	stdev							average	stdev
WT css	0	100	0					WT lds	0	100	0
	0.5	7.03835	4.94162						0.5	62.3246	14.7137
	1	0	0						1	0.0764946	0.132492
	2	0	0						2	0	0
	4	0	0						4	0	0
7A css	0	100	0					7A lds	0	100	0
	0.5	95.2803	7.01667						0.5	83.7145	17.0989
	1	103.807	8.12623						1	88.3691	19.5894
	2	105.916	14.1934						2	90.4524	20.0382
	4	104.739	10.876						4	88.3665	17.891
3A css	0	100	0					3A lds	0	100	0
	0.5	74.7628	12.5362						0.5	73.7847	14.1601
	1	23.8396	6.3569						1	36.9239	21.0174
	2	0.587142	0.675769						2	0	0
	4	0	0						4	0	0
4A css	0	100	0					4A lds	0	100	0
	0.5	83.7263	9.31648						0.5	83.9012	14.9434
	1	66.4568	6.921						1	71.9071	10.387
	2	28.0044	3.25531						2	14.1619	11.5488
	4	5.42947	0.572696						4	0	0
