# Supplementary material for: Cooperative interactions facilitate stimulation of Rad51 by the Swi5-Sfr1 auxiliary factor complex
Source: eLife. 2020 Mar 24;9:e52566. doi: 10.7554/eLife.52566 (PMC7093153; doi:10.7554/eLife.52566)
Supplement: Figure 6—source data 1. — koff values for data in Figure 6F. kcat values for data in Figure 6G. [file elife-52566-fig6-data1.xlsx]

## Sheet: Source_6B_6C_6D_6E
Time (sec)	WT					7A					3A					4A
	0 µM	0.025 µM	0.05 µM	0.10 µM	0.25 µM	0 µM	0.025 µM	0.05 µM	0.10 µM	0.25 µM	0 µM	0.025 µM	0.05 µM	0.10 µM	0.25 µM	0 µM	0.025 µM	0.05 µM	0.10 µM	0.25 µM
5	0.224297	0.292284	0.258296	0.253089	0.264892	0.224297	0.239385	0.230101	0.256031	0.251651	0.224297	0.262641	0.25345	0.26272	0.262705	0.224297	0.230004	0.255183	0.262558	0.26434
6	0.219861	0.25751	0.254783	0.25466	0.257887	0.219861	0.230825	0.235378	0.247059	0.261765	0.219861	0.257793	0.270477	0.25805	0.263948	0.219861	0.230275	0.256304	0.260274	0.25417
7	0.214146	0.251258	0.256203	0.314804	0.263863	0.214146	0.234758	0.228576	0.246346	0.251093	0.214146	0.254346	0.26236	0.261035	0.256808	0.214146	0.22848	0.245772	0.2544	0.260001
8	0.21548	0.301394	0.25328	0.255706	0.255521	0.21548	0.22769	0.236839	0.326874	0.254667	0.21548	0.256792	0.267708	0.258236	0.262612	0.21548	0.232974	0.24785	0.264376	0.258207
9	0.215344	0.247402	0.254242	0.256722	0.270212	0.215344	0.225727	0.234719	0.238053	0.251632	0.215344	0.253225	0.254599	0.263236	0.261907	0.215344	0.23378	0.281332	0.256474	0.267689
10	0.210932	0.259915	0.250377	0.255438	0.26469	0.210932	0.225994	0.226785	0.242748	0.252746	0.210932	0.25093	0.250245	0.262695	0.260621	0.210932	0.229605	0.248599	0.256035	0.258439
11	0.21343	0.25836	0.252116	0.265598	0.25434	0.21343	0.224152	0.227047	0.244154	0.252757	0.21343	0.254506	0.262554	0.260857	0.259245	0.21343	0.229338	0.247386	0.256699	0.261035
12	0.208484	0.2566	0.249872	0.26026	0.258676	0.208484	0.230453	0.221155	0.242031	0.253578	0.208484	0.255025	0.257427	0.261859	0.26287	0.208484	0.231212	0.252225	0.255015	0.259829
13	0.213398	0.301309	0.24694	0.25749	0.263025	0.213398	0.222082	0.225716	0.24078	0.252243	0.213398	0.251528	0.251407	0.260865	0.26208	0.213398	0.231121	0.245367	0.253599	0.254829
14	0.209089	0.25475	0.250478	0.256718	0.25249	0.209089	0.226211	0.2239	0.23799	0.252573	0.209089	0.244156	0.255415	0.258729	0.261764	0.209089	0.231025	0.246522	0.243363	0.253945
15	0.211147	0.249932	0.246169	0.258474	0.261514	0.211147	0.213572	0.225578	0.238586	0.247398	0.211147	0.247149	0.253239	0.265795	0.260363	0.211147	0.22258	0.241645	0.248255	0.251983
16	0.207747	0.251776	0.241684	0.253162	0.261474	0.207747	0.221532	0.224648	0.23415	0.250048	0.207747	0.246437	0.25394	0.267231	0.261881	0.207747	0.227364	0.269522	0.249967	0.251006
17	0.207977	0.257426	0.253412	0.257715	0.262055	0.207977	0.215618	0.22473	0.248282	0.25474	0.207977	0.245787	0.245883	0.258962	0.263772	0.207977	0.226019	0.232227	0.251949	0.259941
18	0.206146	0.247713	0.250537	0.25788	0.261543	0.206146	0.222986	0.225711	0.239355	0.249939	0.206146	0.248024	0.248899	0.258946	0.262986	0.206146	0.224725	0.240023	0.245651	0.255459
19	0.209845	0.244686	0.255884	0.258045	0.259801	0.209845	0.218015	0.22005	0.237207	0.246085	0.209845	0.248039	0.24725	0.259772	0.259899	0.209845	0.225736	0.244181	0.250054	0.25236
20	0.210064	0.244274	0.243184	0.256811	0.258692	0.210064	0.218511	0.218114	0.238491	0.242965	0.210064	0.246183	0.250792	0.265377	0.256336	0.210064	0.22427	0.237404	0.247752	0.25997
21	0.203912	0.249372	0.243964	0.255951	0.256192	0.203912	0.218647	0.222754	0.239107	0.241591	0.203912	0.250148	0.247527	0.257591	0.252752	0.203912	0.217915	0.242391	0.242845	0.253223
22	0.204714	0.245261	0.243384	0.251422	0.255424	0.204714	0.213656	0.219413	0.234375	0.241994	0.204714	0.241279	0.246445	0.253581	0.255282	0.204714	0.219209	0.237082	0.251156	0.25442
23	0.201246	0.241423	0.244945	0.258385	0.258489	0.201246	0.2139	0.215329	0.233172	0.240524	0.201246	0.24058	0.244671	0.254502	0.257956	0.201246	0.221531	0.237463	0.254282	0.252489
24	0.205493	0.245357	0.245646	0.241979	0.254028	0.205493	0.215997	0.218413	0.236767	0.244573	0.205493	0.235474	0.247127	0.251934	0.258757	0.205493	0.220439	0.240093	0.247321	0.252872
25	0.200725	0.244917	0.246182	0.255417	0.257154	0.200725	0.212119	0.218297	0.228066	0.246772	0.200725	0.23536	0.241769	0.259134	0.260788	0.200725	0.218336	0.230926	0.249116	0.251663
26	0.195176	0.246024	0.249428	0.255426	0.260226	0.195176	0.215041	0.218559	0.225651	0.242664	0.195176	0.236536	0.241254	0.257719	0.257468	0.195176	0.216829	0.233979	0.246095	0.249757
27	0.197704	0.24475	0.239042	0.252791	0.251493	0.197704	0.212127	0.218473	0.226703	0.240077	0.197704	0.236724	0.243531	0.258467	0.258246	0.197704	0.219781	0.233131	0.249917	0.251355
28	0.196124	0.236738	0.248471	0.257932	0.263016	0.196124	0.212998	0.213557	0.229321	0.242498	0.196124	0.238086	0.245892	0.256573	0.257087	0.196124	0.214715	0.231885	0.246797	0.24971
29	0.194883	0.244214	0.245269	0.253214	0.255399	0.194883	0.208519	0.217944	0.222799	0.245619	0.194883	0.235843	0.243579	0.259862	0.254456	0.194883	0.214337	0.239028	0.237677	0.242663
30	0.188782	0.237536	0.241918	0.249298	0.260096	0.188782	0.209004	0.214494	0.231377	0.24031	0.188782	0.235733	0.236752	0.26139	0.259504	0.188782	0.215078	0.23069	0.243696	0.256186
31	0.191802	0.234672	0.245514	0.251996	0.253953	0.191802	0.214413	0.21296	0.229914	0.236334	0.191802	0.235062	0.242396	0.250008	0.258385	0.191802	0.210998	0.229278	0.239206	0.248103
32	0.196232	0.239792	0.246615	0.25737	0.264396	0.196232	0.211916	0.212039	0.221951	0.234226	0.196232	0.236057	0.240314	0.258116	0.253647	0.196232	0.213425	0.226758	0.237586	0.253943
33	0.193631	0.240534	0.242056	0.251174	0.258242	0.193631	0.20623	0.206348	0.221457	0.239812	0.193631	0.23375	0.243838	0.251456	0.259982	0.193631	0.205667	0.224772	0.237321	0.252042
34	0.191363	0.241752	0.242802	0.254051	0.259319	0.191363	0.205456	0.21544	0.221021	0.230435	0.191363	0.234031	0.237932	0.253432	0.259565	0.191363	0.21107	0.225826	0.241549	0.248967
35	0.18814	0.242382	0.237865	0.245123	0.25434	0.18814	0.213115	0.211175	0.224981	0.230355	0.18814	0.228506	0.239037	0.249254	0.251936	0.18814	0.213572	0.222512	0.235591	0.247607
36	0.191916	0.240624	0.235478	0.248443	0.265107	0.191916	0.207614	0.201626	0.226653	0.230606	0.191916	0.235765	0.248784	0.249964	0.258759	0.191916	0.209366	0.226433	0.230733	0.246403
37	0.186071	0.241389	0.24061	0.252513	0.255944	0.186071	0.204494	0.206257	0.215487	0.233512	0.186071	0.238342	0.238661	0.25035	0.255017	0.186071	0.21116	0.223042	0.237606	0.247289
38	0.190762	0.238475	0.240316	0.251526	0.259043	0.190762	0.200347	0.206456	0.21247	0.23141	0.190762	0.22833	0.232549	0.25262	0.252993	0.190762	0.203286	0.21992	0.237324	0.24901
39	0.188631	0.241129	0.235979	0.256069	0.250162	0.188631	0.201532	0.202543	0.218267	0.232838	0.188631	0.227353	0.235941	0.252429	0.25171	0.188631	0.20689	0.230042	0.242961	0.246931
40	0.185471	0.233629	0.236647	0.248527	0.256166	0.185471	0.197005	0.206817	0.217574	0.232335	0.185471	0.229652	0.233681	0.250784	0.247636	0.185471	0.206445	0.222943	0.238091	0.24912
41	0.190741	0.231586	0.238655	0.249489	0.253608	0.190741	0.198802	0.197902	0.218878	0.225564	0.190741	0.225221	0.229651	0.252717	0.252929	0.190741	0.199326	0.218106	0.23367	0.245565
42	0.180884	0.239317	0.235849	0.244973	0.252509	0.180884	0.197639	0.195111	0.21207	0.229765	0.180884	0.224506	0.227567	0.250013	0.255439	0.180884	0.202436	0.221315	0.238157	0.244222
43	0.183829	0.232301	0.236286	0.243834	0.261861	0.183829	0.198683	0.205709	0.216976	0.230898	0.183829	0.228041	0.232438	0.248019	0.259528	0.183829	0.201812	0.219407	0.235412	0.243041
44	0.175043	0.235991	0.23145	0.250144	0.259104	0.175043	0.195889	0.20127	0.215003	0.226353	0.175043	0.22088	0.238496	0.247176	0.246233	0.175043	0.19993	0.218709	0.234463	0.24569
45	0.18516	0.227243	0.236536	0.249213	0.259863	0.18516	0.200284	0.197476	0.211292	0.229113	0.18516	0.221026	0.228688	0.250712	0.252015	0.18516	0.19551	0.21735	0.232887	0.247441
46	0.178869	0.236955	0.230891	0.250073	0.25317	0.178869	0.196646	0.197347	0.210183	0.229255	0.178869	0.218452	0.233262	0.245901	0.252217	0.178869	0.196694	0.216538	0.232612	0.249013
47	0.176286	0.225261	0.236127	0.245995	0.261754	0.176286	0.196004	0.20334	0.21459	0.230712	0.176286	0.22307	0.228889	0.244857	0.251943	0.176286	0.199147	0.218859	0.232218	0.24384
48	0.17395	0.223701	0.234562	0.242789	0.253434	0.17395	0.192961	0.204338	0.213978	0.222668	0.17395	0.218301	0.228331	0.246991	0.251529	0.17395	0.200648	0.215261	0.234847	0.245335
49	0.180614	0.226057	0.235796	0.250479	0.249289	0.180614	0.193909	0.200343	0.208195	0.220935	0.180614	0.221415	0.227746	0.249217	0.247858	0.180614	0.195425	0.218514	0.234032	0.247949
50	0.182549	0.229758	0.233113	0.249538	0.252299	0.182549	0.189392	0.198226	0.207186	0.217203	0.182549	0.213224	0.229945	0.245679	0.245344	0.182549	0.200848	0.211798	0.228801	0.238807
51	0.181199	0.224684	0.233621	0.245613	0.257021	0.181199	0.188133	0.195475	0.207589	0.225754	0.181199	0.213166	0.226945	0.247991	0.257229	0.181199	0.195736	0.217955	0.234271	0.24645
52	0.177023	0.227262	0.231858	0.249469	0.25697	0.177023	0.189692	0.194135	0.20472	0.227321	0.177023	0.218749	0.225143	0.245586	0.24794	0.177023	0.189073	0.212055	0.233787	0.237967
53	0.17601	0.229699	0.234059	0.244529	0.253891	0.17601	0.19051	0.192482	0.203677	0.221768	0.17601	0.215305	0.234452	0.243077	0.252408	0.17601	0.187759	0.215679	0.230863	0.240497
54	0.177353	0.220259	0.229544	0.248712	0.255801	0.177353	0.183639	0.18925	0.201173	0.216691	0.177353	0.213154	0.225062	0.246197	0.246978	0.177353	0.194049	0.212721	0.23199	0.238219
55	0.173789	0.224836	0.232016	0.249737	0.257193	0.173789	0.187758	0.191767	0.206053	0.225996	0.173789	0.2139	0.220958	0.235808	0.245222	0.173789	0.199579	0.215836	0.224813	0.23888
56	0.171715	0.219199	0.234158	0.241459	0.257919	0.171715	0.188515	0.193026	0.201727	0.220467	0.171715	0.208805	0.228337	0.244561	0.25129	0.171715	0.18814	0.212354	0.222871	0.245897
57	0.172176	0.228982	0.225848	0.241078	0.251938	0.172176	0.185577	0.192676	0.202745	0.214991	0.172176	0.205048	0.221585	0.240746	0.253383	0.172176	0.189012	0.205127	0.229742	0.240502
58	0.168812	0.22496	0.237768	0.248073	0.251311	0.168812	0.183239	0.195489	0.20507	0.212454	0.168812	0.213642	0.223453	0.237302	0.246545	0.168812	0.19157	0.208597	0.227771	0.241551
59	0.174682	0.220595	0.225434	0.244643	0.253601	0.174682	0.186072	0.18129	0.195815	0.210671	0.174682	0.207797	0.216677	0.241934	0.246253	0.174682	0.188036	0.204396	0.226655	0.236957
60	0.168129	0.214085	0.222926	0.23989	0.253389	0.168129	0.185774	0.188625	0.204786	0.21319	0.168129	0.207519	0.223334	0.244089	0.251762	0.168129	0.188286	0.205292	0.227655	0.240622
61	0.174352	0.224287	0.227742	0.238549	0.251836	0.174352	0.184103	0.187796	0.203996	0.214715	0.174352	0.204188	0.220161	0.239711	0.242059	0.174352	0.185552	0.206243	0.225762	0.241678
62	0.171519	0.221253	0.230337	0.240387	0.253738	0.171519	0.185564	0.183612	0.197749	0.219586	0.171519	0.211617	0.212031	0.245324	0.250634	0.171519	0.187581	0.205457	0.223779	0.233514
63	0.166838	0.223701	0.231389	0.240929	0.249749	0.166838	0.182172	0.185949	0.198006	0.21058	0.166838	0.207215	0.22146	0.244653	0.246153	0.166838	0.187559	0.206131	0.225847	0.235739
64	0.168269	0.220251	0.224525	0.246648	0.25346	0.168269	0.179693	0.185335	0.196512	0.216077	0.168269	0.201962	0.217437	0.239693	0.245482	0.168269	0.187299	0.202952	0.221749	0.237424
65	0.169145	0.216846	0.227575	0.245189	0.250801	0.169145	0.181366	0.182649	0.193843	0.215721	0.169145	0.202816	0.216512	0.239125	0.249077	0.169145	0.184651	0.200963	0.230224	0.237407
66	0.166458	0.215194	0.226264	0.241307	0.257446	0.166458	0.178308	0.185685	0.190041	0.215049	0.166458	0.209843	0.21033	0.24421	0.249771	0.166458	0.180885	0.200469	0.221663	0.233855
67	0.168491	0.219108	0.22386	0.238857	0.250795	0.168491	0.178957	0.183785	0.196979	0.217035	0.168491	0.200109	0.221421	0.231965	0.24831	0.168491	0.181419	0.203702	0.216722	0.239498
68	0.161463	0.214631	0.222653	0.246825	0.247332	0.161463	0.174964	0.185025	0.194149	0.209208	0.161463	0.19741	0.215876	0.238378	0.251765	0.161463	0.184303	0.202058	0.222797	0.233205
69	0.164638	0.214728	0.224847	0.241774	0.255722	0.164638	0.179164	0.180676	0.192054	0.207713	0.164638	0.195624	0.213932	0.238772	0.251096	0.164638	0.174515	0.194671	0.214611	0.233379
70	0.164483	0.213943	0.226314	0.239344	0.258227	0.164483	0.179312	0.17868	0.184572	0.204618	0.164483	0.199673	0.211716	0.240448	0.252223	0.164483	0.169787	0.199217	0.222101	0.234033
71	0.160745	0.217538	0.220408	0.240208	0.254765	0.160745	0.176881	0.183097	0.183843	0.20385	0.160745	0.195649	0.214657	0.24228	0.240963	0.160745	0.180416	0.194813	0.223355	0.236756
72	0.155138	0.216208	0.222933	0.241826	0.251774	0.155138	0.176977	0.173298	0.192611	0.204118	0.155138	0.198165	0.20835	0.242208	0.245445	0.155138	0.182649	0.2001	0.219228	0.235721
73	0.166203	0.215374	0.223063	0.240056	0.248961	0.166203	0.16768	0.177614	0.192097	0.206527	0.166203	0.196395	0.208311	0.237161	0.2406	0.166203	0.172951	0.197527	0.21639	0.240241
74	0.160501	0.218285	0.227975	0.251173	0.255645	0.160501	0.171257	0.177581	0.186621	0.202253	0.160501	0.197685	0.210037	0.229649	0.252282	0.160501	0.173269	0.195428	0.217021	0.237618
75	0.166028	0.213388	0.224511	0.246095	0.256515	0.166028	0.170194	0.174544	0.180037	0.208311	0.166028	0.19628	0.215832	0.234171	0.239632	0.166028	0.168782	0.18886	0.214614	0.236234
76	0.160515	0.208154	0.219143	0.242024	0.253389	0.160515	0.170301	0.182807	0.192941	0.199856	0.160515	0.195748	0.209857	0.234576	0.240559	0.160515	0.170003	0.194287	0.213788	0.235306
77	0.165469	0.208338	0.226245	0.242132	0.249951	0.165469	0.168744	0.169852	0.185605	0.206165	0.165469	0.19076	0.211227	0.236506	0.243445	0.165469	0.174079	0.195878	0.210821	0.228215
78	0.155415	0.21329	0.222458	0.239263	0.253627	0.155415	0.169767	0.178866	0.188669	0.203357	0.155415	0.190147	0.21043	0.235302	0.245105	0.155415	0.170847	0.187935	0.217671	0.234668
79	0.150657	0.208068	0.216224	0.242812	0.257236	0.150657	0.167004	0.170603	0.180335	0.20726	0.150657	0.188702	0.20498	0.238557	0.242801	0.150657	0.165878	0.1924	0.214421	0.234403
80	0.15896	0.207535	0.225348	0.236856	0.250895	0.15896	0.170316	0.174455	0.183936	0.199859	0.15896	0.19456	0.20594	0.231292	0.245192	0.15896	0.172161	0.195095	0.212725	0.228991
81	0.157228	0.212679	0.22307	0.236284	0.249443	0.157228	0.167066	0.167439	0.190127	0.198761	0.157228	0.190514	0.204682	0.230444	0.244245	0.157228	0.169515	0.192752	0.209911	0.230707
82	0.158463	0.205148	0.217196	0.233311	0.244226	0.158463	0.170018	0.171362	0.18649	0.199225	0.158463	0.190305	0.204401	0.233385	0.243646	0.158463	0.167945	0.189584	0.208903	0.224248
83	0.160283	0.206196	0.216822	0.238028	0.247997	0.160283	0.16196	0.16556	0.180962	0.199838	0.160283	0.18595	0.208087	0.235553	0.242554	0.160283	0.160739	0.190576	0.217649	0.228086
84	0.152194	0.205034	0.221595	0.234849	0.246052	0.152194	0.163822	0.168851	0.183269	0.198858	0.152194	0.186673	0.207228	0.238631	0.23916	0.152194	0.163241	0.186173	0.21135	0.228195
85	0.156219	0.203593	0.215052	0.239212	0.245329	0.156219	0.165672	0.172924	0.179841	0.19982	0.156219	0.18724	0.207888	0.233092	0.247848	0.156219	0.16701	0.186131	0.213569	0.226738
86	0.156501	0.209107	0.216927	0.239727	0.247418	0.156501	0.171802	0.166101	0.179752	0.194877	0.156501	0.18632	0.194997	0.232991	0.237585	0.156501	0.167447	0.185962	0.207389	0.227527
87	0.16062	0.205221	0.213684	0.230818	0.254434	0.16062	0.161958	0.162785	0.173154	0.197383	0.16062	0.177127	0.199682	0.229882	0.247609	0.16062	0.159016	0.184589	0.214046	0.231971
88	0.15127	0.202605	0.215786	0.235858	0.248299	0.15127	0.168237	0.168541	0.175975	0.194982	0.15127	0.184508	0.198549	0.228291	0.240278	0.15127	0.162698	0.181923	0.21294	0.231481
89	0.145793	0.202409	0.220519	0.23412	0.24751	0.145793	0.165831	0.165695	0.17526	0.197445	0.145793	0.18618	0.205249	0.230202	0.250133	0.145793	0.160626	0.181716	0.205464	0.229065
90	0.148717	0.200218	0.217266	0.233289	0.256087	0.148717	0.163556	0.166447	0.176228	0.194008	0.148717	0.178119	0.200967	0.22923	0.244452	0.148717	0.154062	0.184773	0.208566	0.226584
91	0.153296	0.20047	0.210526	0.231755	0.252235	0.153296	0.163735	0.16497	0.179064	0.194224	0.153296	0.178495	0.201787	0.231616	0.239655	0.153296	0.162608	0.181996	0.209779	0.223442
92	0.152257	0.198531	0.214114	0.240781	0.247946	0.152257	0.161617	0.165456	0.175375	0.192424	0.152257	0.182813	0.200292	0.229667	0.240327	0.152257	0.157983	0.186072	0.213965	0.222711
93	0.153058	0.199105	0.217072	0.233892	0.252218	0.153058	0.15821	0.165211	0.171049	0.193122	0.153058	0.178367	0.197182	0.228576	0.236306	0.153058	0.157982	0.1792	0.210439	0.230039
94	0.150892	0.195014	0.218924	0.235051	0.248425	0.150892	0.160416	0.164629	0.168919	0.190051	0.150892	0.17547	0.197572	0.220056	0.24398	0.150892	0.151883	0.179516	0.205627	0.233227
95	0.147905	0.203258	0.213417	0.230326	0.249114	0.147905	0.16193	0.164786	0.166925	0.183945	0.147905	0.181471	0.193007	0.230433	0.236465	0.147905	0.156047	0.18263	0.209897	0.223028
96	0.147144	0.193116	0.214551	0.236595	0.246906	0.147144	0.161329	0.152072	0.169779	0.18461	0.147144	0.17615	0.198376	0.227808	0.238443	0.147144	0.160199	0.181491	0.215473	0.242982
97	0.151342	0.198858	0.206988	0.232447	0.247189	0.151342	0.151288	0.164408	0.173198	0.19064	0.151342	0.173163	0.199149	0.222248	0.243215	0.151342	0.155119	0.178566	0.210477	0.226627
98	0.145294	0.195208	0.214841	0.239912	0.246322	0.145294	0.158286	0.170509	0.168206	0.191722	0.145294	0.175175	0.202049	0.226182	0.241699	0.145294	0.154318	0.182095	0.208981	0.220365
99	0.15019	0.190728	0.209021	0.23357	0.253762	0.15019	0.157433	0.172269	0.173886	0.18913	0.15019	0.177515	0.203477	0.218373	0.237751	0.15019	0.150945	0.175633	0.200095	0.224762
100	0.152124	0.198099	0.212357	0.238232	0.24727	0.152124	0.154769	0.157515	0.173278	0.187586	0.152124	0.17408	0.197244	0.225034	0.237847	0.152124	0.155852	0.176725	0.206194	0.224522
101	0.149728	0.191375	0.208153	0.227245	0.24494	0.149728	0.151194	0.156422	0.163612	0.185568	0.149728	0.178089	0.196061	0.22569	0.23544	0.149728	0.156579	0.176838	0.20744	0.226936
102	0.148416	0.193209	0.208236	0.234706	0.253457	0.148416	0.15384	0.164703	0.169154	0.188656	0.148416	0.174671	0.196996	0.227758	0.236002	0.148416	0.158369	0.178706	0.20435	0.225037
103	0.143319	0.193058	0.206459	0.235289	0.24111	0.143319	0.156426	0.160361	0.164475	0.182563	0.143319	0.174123	0.195974	0.224324	0.238582	0.143319	0.148359	0.176027	0.199795	0.2263
104	0.144804	0.195092	0.209837	0.235191	0.242483	0.144804	0.159135	0.160554	0.160583	0.185204	0.144804	0.169912	0.195151	0.226012	0.238712	0.144804	0.148163	0.166704	0.1998	0.221764
105	0.150617	0.192253	0.209632	0.231317	0.250247	0.150617	0.150477	0.1527	0.174676	0.183835	0.150617	0.171279	0.195304	0.224444	0.233576	0.150617	0.149213	0.170183	0.204097	0.224234
106	0.141458	0.192439	0.212346	0.23396	0.243521	0.141458	0.151371	0.157523	0.162543	0.187761	0.141458	0.171659	0.191879	0.223295	0.232314	0.141458	0.152947	0.174101	0.207555	0.218822
107	0.146378	0.193772	0.208152	0.231901	0.248661	0.146378	0.159394	0.148175	0.168373	0.188999	0.146378	0.168741	0.18883	0.227944	0.234621	0.146378	0.151255	0.17466	0.205649	0.21824
108	0.136762	0.192931	0.208195	0.230057	0.247862	0.136762	0.151421	0.157575	0.163259	0.181989	0.136762	0.167795	0.19028	0.222968	0.234542	0.136762	0.147829	0.166054	0.195657	0.225194
109	0.146501	0.189901	0.211295	0.229467	0.243764	0.146501	0.154954	0.155803	0.160822	0.182555	0.146501	0.167817	0.187926	0.223669	0.2402	0.146501	0.148129	0.169829	0.206794	0.221501
110	0.151802	0.186596	0.208623	0.231389	0.245305	0.151802	0.151244	0.153501	0.161311	0.186403	0.151802	0.167562	0.195333	0.220002	0.23581	0.151802	0.146018	0.171803	0.204257	0.220071
111	0.144726	0.18782	0.207909	0.2243	0.249006	0.144726	0.156709	0.152051	0.162836	0.180004	0.144726	0.161576	0.189554	0.228923	0.232245	0.144726	0.148828	0.165621	0.196273	0.223971
112	0.140798	0.19055	0.204317	0.227671	0.242232	0.140798	0.153654	0.152465	0.160207	0.177493	0.140798	0.169814	0.186235	0.217123	0.23797	0.140798	0.145602	0.17	0.1962	0.220816
113	0.14273	0.185303	0.206908	0.23191	0.239569	0.14273	0.149294	0.147236	0.156915	0.184016	0.14273	0.165278	0.189003	0.221204	0.241756	0.14273	0.154944	0.166726	0.195454	0.221481
114	0.139421	0.188576	0.19666	0.234226	0.247874	0.139421	0.145152	0.153763	0.154158	0.178147	0.139421	0.171062	0.187939	0.221641	0.237731	0.139421	0.147832	0.168811	0.198629	0.218517
115	0.138962	0.189012	0.207285	0.230263	0.248476	0.138962	0.145363	0.15447	0.15896	0.177643	0.138962	0.159126	0.182799	0.221045	0.235845	0.138962	0.15205	0.165398	0.197196	0.225175
116	0.149191	0.191838	0.204199	0.225026	0.246336	0.149191	0.145751	0.150411	0.159085	0.174787	0.149191	0.161617	0.18658	0.225872	0.237149	0.149191	0.14005	0.169231	0.202238	0.219499
117	0.143383	0.186489	0.204741	0.23385	0.242173	0.143383	0.150516	0.146278	0.156805	0.169962	0.143383	0.159876	0.188205	0.224704	0.234723	0.143383	0.14947	0.169645	0.200204	0.218353
118	0.147157	0.184032	0.201655	0.234663	0.245771	0.147157	0.145405	0.148277	0.158434	0.179392	0.147157	0.158818	0.182246	0.214994	0.231711	0.147157	0.14082	0.171867	0.197765	0.223464
119	0.142356	0.185498	0.205648	0.225823	0.246294	0.142356	0.146281	0.146972	0.157925	0.179234	0.142356	0.159508	0.193203	0.219556	0.230752	0.142356	0.139103	0.163571	0.197948	0.2179
120	0.136791	0.185386	0.207732	0.231622	0.246494	0.136791	0.146837	0.144275	0.150509	0.175035	0.136791	0.164404	0.178941	0.22147	0.233209	0.136791	0.141036	0.173765	0.194628	0.211302
121	0.13491	0.181475	0.203507	0.228604	0.239111	0.13491	0.150476	0.151528	0.151262	0.175454	0.13491	0.159225	0.181709	0.219086	0.2305	0.13491	0.145005	0.168227	0.193022	0.216268
122	0.146301	0.182594	0.204518	0.227886	0.24969	0.146301	0.142445	0.147196	0.151107	0.173108	0.146301	0.158686	0.182571	0.221172	0.230516	0.146301	0.140673	0.164578	0.196511	0.211594
123	0.134154	0.184537	0.207067	0.229867	0.250442	0.134154	0.143112	0.151915	0.158329	0.16891	0.134154	0.161882	0.182273	0.217593	0.234436	0.134154	0.137254	0.165569	0.195577	0.21427
124	0.140322	0.18295	0.195712	0.225903	0.247885	0.140322	0.143363	0.152348	0.152262	0.172368	0.140322	0.159083	0.178846	0.220173	0.233013	0.140322	0.144972	0.165036	0.188193	0.212304
125	0.137059	0.177717	0.202586	0.237115	0.247488	0.137059	0.142314	0.14357	0.154806	0.171202	0.137059	0.159177	0.178935	0.215415	0.235514	0.137059	0.143729	0.157261	0.196007	0.21633
126	0.140803	0.176417	0.194423	0.230064	0.246883	0.140803	0.146114	0.143991	0.152864	0.166198	0.140803	0.153363	0.179669	0.216047	0.232783	0.140803	0.137696	0.158172	0.19532	0.210406
127	0.135066	0.179784	0.206946	0.22913	0.245308	0.135066	0.14566	0.147843	0.154375	0.178651	0.135066	0.158054	0.17874	0.215102	0.236349	0.135066	0.141112	0.159213	0.190562	0.211488
128	0.141763	0.177732	0.201761	0.22891	0.248518	0.141763	0.140758	0.141297	0.154072	0.16702	0.141763	0.155623	0.177046	0.215206	0.232879	0.141763	0.138219	0.157461	0.193364	0.210484
129	0.140678	0.1796	0.199268	0.230362	0.245772	0.140678	0.145663	0.143361	0.149377	0.171758	0.140678	0.154815	0.174746	0.220362	0.233737	0.140678	0.138386	0.158793	0.183233	0.213383
130	0.14094	0.179587	0.194662	0.227954	0.241722	0.14094	0.147627	0.142526	0.148706	0.173181	0.14094	0.158006	0.177556	0.215649	0.22889	0.14094	0.131113	0.162523	0.191938	0.211797
131	0.139276	0.181594	0.199698	0.229187	0.246603	0.139276	0.146694	0.145251	0.147252	0.17472	0.139276	0.157393	0.179575	0.211939	0.228574	0.139276	0.137249	0.15807	0.191115	0.211712
132	0.135527	0.182045	0.197564	0.22933	0.251866	0.135527	0.140488	0.14024	0.148685	0.16701	0.135527	0.176966	0.180396	0.218696	0.233792	0.135527	0.136363	0.153102	0.187586	0.21325
133	0.135932	0.182749	0.197055	0.223081	0.241783	0.135932	0.138614	0.142101	0.143517	0.16976	0.135932	0.149455	0.175548	0.212451	0.227281	0.135932	0.139172	0.155432	0.195739	0.212642
134	0.131301	0.177161	0.197167	0.233893	0.249237	0.131301	0.148349	0.141671	0.148908	0.164874	0.131301	0.154451	0.176087	0.215472	0.234472	0.131301	0.139228	0.157525	0.187924	0.216122
135	0.138512	0.181811	0.191	0.229212	0.249488	0.138512	0.140693	0.143916	0.144435	0.168668	0.138512	0.152298	0.173825	0.214834	0.230527	0.138512	0.132676	0.153747	0.189164	0.213761
136	0.137666	0.175532	0.19643	0.235436	0.245926	0.137666	0.143662	0.144144	0.148114	0.170907	0.137666	0.150769	0.178565	0.210198	0.232768	0.137666	0.137637	0.155751	0.184558	0.205989
137	0.131768	0.171951	0.195874	0.222849	0.249069	0.131768	0.151148	0.143036	0.147245	0.157564	0.131768	0.149092	0.17625	0.22118	0.22998	0.131768	0.130658	0.15554	0.187635	0.209077
138	0.132042	0.173124	0.195119	0.225433	0.247885	0.132042	0.14147	0.143607	0.146872	0.162114	0.132042	0.151705	0.182986	0.215533	0.228066	0.132042	0.131417	0.153717	0.188628	0.206235
139	0.133859	0.17735	0.196127	0.228046	0.24586	0.133859	0.13891	0.146208	0.14372	0.165306	0.133859	0.150151	0.177791	0.209741	0.226495	0.133859	0.129061	0.155571	0.18951	0.210758
140	0.136423	0.176698	0.201426	0.227393	0.250153	0.136423	0.138409	0.144407	0.149889	0.160748	0.136423	0.148884	0.172675	0.208043	0.221616	0.136423	0.130375	0.153061	0.187779	0.207221
141	0.134145	0.174151	0.197721	0.228157	0.243993	0.134145	0.13965	0.140108	0.145529	0.161636	0.134145	0.151638	0.170791	0.215587	0.229939	0.134145	0.133865	0.151722	0.181635	0.205863
142	0.139958	0.176445	0.201098	0.224752	0.243758	0.139958	0.135248	0.139842	0.145356	0.164712	0.139958	0.143146	0.174457	0.213712	0.227779	0.139958	0.135837	0.152711	0.180785	0.215471
143	0.134807	0.169019	0.194494	0.228961	0.237157	0.134807	0.137814	0.136949	0.143178	0.160211	0.134807	0.146886	0.177951	0.212841	0.231123	0.134807	0.13425	0.152765	0.18086	0.2089
144	0.133342	0.173699	0.191624	0.224819	0.244023	0.133342	0.139548	0.139755	0.143861	0.167101	0.133342	0.147224	0.172306	0.210897	0.231412	0.133342	0.130534	0.151667	0.185503	0.207943
145	0.132761	0.178235	0.190932	0.227171	0.244769	0.132761	0.137532	0.136928	0.141557	0.165766	0.132761	0.149199	0.171802	0.211793	0.236051	0.132761	0.132204	0.14813	0.184498	0.207749
146	0.135623	0.162206	0.193112	0.223732	0.244688	0.135623	0.136942	0.138832	0.144419	0.15764	0.135623	0.151873	0.169245	0.207662	0.222045	0.135623	0.134987	0.154179	0.179585	0.206733
147	0.127206	0.174082	0.193989	0.220782	0.244843	0.127206	0.136713	0.135589	0.14326	0.157247	0.127206	0.150308	0.170294	0.208391	0.229098	0.127206	0.129819	0.148874	0.18103	0.206116
148	0.13393	0.17147	0.191993	0.221824	0.247365	0.13393	0.136718	0.139368	0.145425	0.160066	0.13393	0.14698	0.166054	0.202992	0.23382	0.13393	0.138756	0.151071	0.18026	0.205872
149	0.137911	0.165643	0.188974	0.228557	0.245281	0.137911	0.139961	0.137774	0.139963	0.159752	0.137911	0.149888	0.165603	0.207707	0.230704	0.137911	0.132849	0.144976	0.179493	0.209035
150	0.134344	0.165725	0.196509	0.225108	0.23926	0.134344	0.133114	0.139444	0.140791	0.157194	0.134344	0.152721	0.169095	0.206724	0.223174	0.134344	0.130036	0.145458	0.180738	0.20298
151	0.135694	0.168073	0.189722	0.223888	0.243041	0.135694	0.13722	0.134032	0.134569	0.158524	0.135694	0.145282	0.172744	0.21226	0.219723	0.135694	0.134142	0.156058	0.177669	0.203407
152	0.131294	0.16971	0.185729	0.224697	0.246485	0.131294	0.130179	0.139724	0.142612	0.159418	0.131294	0.146079	0.157419	0.21565	0.218916	0.131294	0.125839	0.147343	0.184022	0.209438
153	0.129657	0.162071	0.197814	0.227677	0.240263	0.129657	0.139073	0.141989	0.144601	0.153476	0.129657	0.148908	0.166429	0.207807	0.222946	0.129657	0.126926	0.143286	0.1807	0.20539
154	0.131638	0.164894	0.187965	0.224054	0.236222	0.131638	0.13996	0.137984	0.14184	0.156571	0.131638	0.147153	0.167518	0.200611	0.227963	0.131638	0.12484	0.142678	0.177537	0.20566
155	0.127393	0.163649	0.18835	0.222333	0.243936	0.127393	0.135345	0.137751	0.137523	0.150896	0.127393	0.143532	0.158103	0.203425	0.223364	0.127393	0.1255	0.14694	0.172352	0.208485
156	0.13161	0.167136	0.189174	0.218538	0.239761	0.13161	0.133195	0.133719	0.135782	0.151719	0.13161	0.145353	0.161607	0.199932	0.22581	0.13161	0.123179	0.147921	0.173652	0.20942
157	0.125395	0.166438	0.187278	0.22754	0.235926	0.125395	0.131707	0.133611	0.131147	0.153913	0.125395	0.150666	0.166614	0.206885	0.225118	0.125395	0.130023	0.149122	0.176216	0.198423
158	0.131525	0.166479	0.186825	0.218564	0.239436	0.131525	0.135834	0.13162	0.13374	0.149003	0.131525	0.142627	0.160322	0.204923	0.219742	0.131525	0.129437	0.141547	0.178577	0.206017
159	0.123578	0.162927	0.188917	0.219097	0.24066	0.123578	0.137752	0.13507	0.142408	0.159201	0.123578	0.146799	0.163471	0.201131	0.225965	0.123578	0.126767	0.147298	0.177989	0.198615
160	0.133832	0.16434	0.187807	0.218381	0.246183	0.133832	0.134504	0.133121	0.137078	0.152183	0.133832	0.137228	0.159287	0.206828	0.22834	0.133832	0.12581	0.1461	0.177375	0.206207
161	0.134722	0.165488	0.185724	0.219586	0.244784	0.134722	0.132899	0.130646	0.134679	0.153307	0.134722	0.14198	0.162839	0.211899	0.227103	0.134722	0.120546	0.144053	0.18213	0.200644
162	0.125519	0.16348	0.186566	0.218202	0.245186	0.125519	0.139341	0.132838	0.134806	0.150001	0.125519	0.142787	0.163184	0.20161	0.223181	0.125519	0.125286	0.143324	0.177786	0.203502
163	0.130743	0.164249	0.185167	0.218927	0.239869	0.130743	0.127165	0.128911	0.142707	0.151769	0.130743	0.137626	0.163283	0.207847	0.226208	0.130743	0.121968	0.139761	0.175361	0.205127
164	0.120258	0.159172	0.186312	0.211661	0.242505	0.120258	0.12826	0.127638	0.138284	0.156228	0.120258	0.140515	0.162732	0.207165	0.225423	0.120258	0.125144	0.146082	0.180493	0.19608
165	0.130251	0.167879	0.185716	0.222913	0.239839	0.130251	0.132221	0.127257	0.134566	0.149698	0.130251	0.136012	0.155584	0.205638	0.223254	0.130251	0.129839	0.135842	0.173055	0.204224
166	0.12933	0.154817	0.183988	0.221486	0.239251	0.12933	0.13094	0.137798	0.133841	0.155801	0.12933	0.136489	0.162486	0.206047	0.226762	0.12933	0.126141	0.144116	0.179346	0.208128
167	0.125332	0.168617	0.185259	0.221491	0.242267	0.125332	0.133084	0.129851	0.134817	0.149493	0.125332	0.138909	0.164205	0.202851	0.225332	0.125332	0.126653	0.144234	0.179392	0.208458
168	0.124381	0.161164	0.182749	0.222247	0.240938	0.124381	0.134074	0.136115	0.134177	0.147117	0.124381	0.132855	0.162984	0.205731	0.225104	0.124381	0.12591	0.14158	0.166368	0.198929
169	0.128337	0.163081	0.184413	0.218223	0.24153	0.128337	0.135193	0.133414	0.140199	0.144739	0.128337	0.136016	0.156738	0.204168	0.218688	0.128337	0.123324	0.142261	0.176432	0.200748
170	0.12294	0.160579	0.180226	0.212374	0.236177	0.12294	0.132479	0.130692	0.136089	0.146984	0.12294	0.134511	0.158727	0.20224	0.222881	0.12294	0.12522	0.133839	0.175272	0.20215
171	0.129696	0.154167	0.186173	0.211026	0.240853	0.129696	0.131075	0.127232	0.134546	0.151743	0.129696	0.138215	0.158027	0.205336	0.222108	0.129696	0.127276	0.134565	0.16949	0.199239
172	0.123602	0.159483	0.180524	0.2186	0.24212	0.123602	0.131898	0.131611	0.131276	0.147362	0.123602	0.133573	0.156629	0.201264	0.219865	0.123602	0.121125	0.143038	0.171905	0.205891
173	0.124223	0.165928	0.183968	0.224459	0.239541	0.124223	0.128976	0.135064	0.134107	0.145591	0.124223	0.142637	0.158202	0.201804	0.225656	0.124223	0.118286	0.139984	0.172321	0.206399
174	0.130178	0.158392	0.182114	0.218554	0.240036	0.130178	0.130378	0.13593	0.132334	0.146114	0.130178	0.133703	0.159469	0.201484	0.216787	0.130178	0.125505	0.142913	0.169158	0.193418
175	0.130656	0.158046	0.177877	0.215342	0.236674	0.130656	0.131319	0.132394	0.136327	0.141322	0.130656	0.130707	0.156676	0.199102	0.219013	0.130656	0.123041	0.140445	0.174614	0.196751
176	0.122612	0.158948	0.183421	0.215368	0.242319	0.122612	0.132584	0.127718	0.131604	0.144152	0.122612	0.136184	0.160102	0.200765	0.222047	0.122612	0.120984	0.141088	0.171443	0.196402
177	0.130749	0.151084	0.184296	0.216539	0.241208	0.130749	0.135132	0.125422	0.128493	0.147162	0.130749	0.130997	0.158981	0.195699	0.219514	0.130749	0.127165	0.1351	0.169076	0.200291
178	0.127395	0.158876	0.182374	0.21253	0.237382	0.127395	0.136274	0.127012	0.136213	0.15006	0.127395	0.135812	0.156571	0.194827	0.222283	0.127395	0.123187	0.142335	0.166843	0.199505
179	0.12724	0.157942	0.18066	0.215941	0.239221	0.12724	0.131396	0.124016	0.133472	0.144856	0.12724	0.136882	0.158367	0.196273	0.218985	0.12724	0.124351	0.133999	0.165127	0.197361
180	0.121499	0.156832	0.18121	0.216367	0.242827	0.121499	0.130767	0.128304	0.139834	0.140769	0.121499	0.135591	0.159529	0.198976	0.22259	0.121499	0.121124	0.135286	0.173079	0.196925
181	0.127259	0.152344	0.181851	0.214773	0.236612	0.127259	0.131984	0.125926	0.128388	0.140743	0.127259	0.142166	0.160632	0.197401	0.220183	0.127259	0.120141	0.13793	0.17454	0.190163
182	0.128869	0.163086	0.181629	0.210148	0.234537	0.128869	0.133603	0.12589	0.137782	0.141388	0.128869	0.129593	0.157465	0.196251	0.212933	0.128869	0.118609	0.139829	0.169814	0.201713
183	0.128444	0.153057	0.1825	0.218984	0.243646	0.128444	0.131169	0.124133	0.128874	0.143175	0.128444	0.134928	0.160061	0.194451	0.220973	0.128444	0.114168	0.138302	0.168584	0.197019
184	0.127688	0.156452	0.180287	0.217893	0.239478	0.127688	0.129788	0.127779	0.126419	0.137202	0.127688	0.133677	0.150487	0.192871	0.219449	0.127688	0.116046	0.133197	0.163994	0.197311
185	0.124787	0.1552	0.175143	0.214338	0.244591	0.124787	0.128005	0.127652	0.127357	0.143737	0.124787	0.133122	0.152268	0.197126	0.212001	0.124787	0.125055	0.138294	0.169232	0.196348
186	0.120402	0.147573	0.175428	0.222235	0.237561	0.120402	0.128742	0.123968	0.128716	0.139481	0.120402	0.131663	0.152226	0.197706	0.219236	0.120402	0.119189	0.132778	0.166777	0.196355
187	0.121023	0.152693	0.173671	0.221304	0.240865	0.121023	0.127068	0.125316	0.125194	0.138701	0.121023	0.130236	0.154146	0.198069	0.223333	0.121023	0.11823	0.134207	0.164955	0.200236
188	0.127187	0.152882	0.177994	0.217388	0.239568	0.127187	0.128652	0.128252	0.129108	0.143792	0.127187	0.130173	0.151077	0.18722	0.212623	0.127187	0.11968	0.135474	0.166403	0.194754
189	0.11823	0.151832	0.176486	0.213623	0.237465	0.11823	0.133583	0.123275	0.126138	0.139588	0.11823	0.132181	0.151929	0.192817	0.216709	0.11823	0.122041	0.129294	0.16037	0.194339
190	0.124387	0.153869	0.177335	0.217063	0.241088	0.124387	0.125837	0.127071	0.132932	0.136928	0.124387	0.134644	0.157417	0.191304	0.216967	0.124387	0.118214	0.136787	0.161287	0.190913
191	0.125314	0.151871	0.175256	0.209826	0.237812	0.125314	0.131977	0.12313	0.128426	0.137007	0.125314	0.136388	0.150111	0.201536	0.215451	0.125314	0.120038	0.13023	0.169157	0.189316
192	0.123662	0.146174	0.172076	0.21295	0.240287	0.123662	0.13439	0.12732	0.12784	0.137424	0.123662	0.126273	0.153285	0.1921	0.214682	0.123662	0.120935	0.131554	0.159336	0.191105
193	0.121193	0.148728	0.179412	0.206824	0.247401	0.121193	0.124473	0.123681	0.130565	0.141061	0.121193	0.130356	0.14992	0.195532	0.216965	0.121193	0.117406	0.134676	0.164062	0.192817
194	0.126118	0.143301	0.174858	0.211422	0.24378	0.126118	0.127156	0.127127	0.128548	0.130876	0.126118	0.125392	0.153652	0.196099	0.213372	0.126118	0.119366	0.127654	0.164179	0.190021
195	0.121139	0.156051	0.175422	0.213307	0.239443	0.121139	0.125453	0.124249	0.127698	0.141692	0.121139	0.1337	0.142112	0.193343	0.218574	0.121139	0.116953	0.139099	0.16365	0.194633
196	0.118384	0.148835	0.173309	0.212049	0.235487	0.118384	0.127224	0.122362	0.125004	0.148154	0.118384	0.127767	0.148232	0.189719	0.217733	0.118384	0.11411	0.132435	0.16506	0.189789
197	0.118192	0.148498	0.178012	0.210246	0.231201	0.118192	0.126714	0.123576	0.126677	0.136505	0.118192	0.132178	0.152499	0.186698	0.217606	0.118192	0.119899	0.134689	0.16629	0.192321
198	0.12675	0.142115	0.177473	0.209336	0.233897	0.12675	0.124798	0.123133	0.129101	0.134721	0.12675	0.134065	0.150295	0.192228	0.214063	0.12675	0.126404	0.136105	0.164015	0.194725
199	0.116566	0.151293	0.170702	0.207667	0.23731	0.116566	0.132536	0.121266	0.119681	0.133518	0.116566	0.131419	0.1516	0.191279	0.216754	0.116566	0.114616	0.130892	0.15985	0.190253
200	0.126033	0.150639	0.176073	0.213228	0.240281	0.126033	0.125178	0.123561	0.129176	0.140267	0.126033	0.128288	0.147316	0.187957	0.218225	0.126033	0.117816	0.127151	0.159144	0.19544
201	0.124732	0.14858	0.17286	0.214665	0.232985	0.124732	0.12789	0.124568	0.129454	0.134473	0.124732	0.124526	0.146573	0.185717	0.21526	0.124732	0.1218	0.133675	0.156639	0.193085
202	0.124754	0.14737	0.171967	0.218199	0.237977	0.124754	0.127089	0.124146	0.124886	0.13267	0.124754	0.130372	0.144686	0.193112	0.21785	0.124754	0.119177	0.131996	0.168867	0.188122
203	0.128366	0.151357	0.173673	0.212996	0.241115	0.128366	0.12183	0.126096	0.129624	0.137849	0.128366	0.126621	0.153961	0.187193	0.211258	0.128366	0.116591	0.132123	0.17628	0.187241
204	0.118786	0.152784	0.170684	0.211073	0.230205	0.118786	0.13094	0.122467	0.127445	0.136772	0.118786	0.127988	0.146874	0.182663	0.212918	0.118786	0.117149	0.133154	0.152067	0.190601
205	0.116858	0.144506	0.169283	0.21321	0.240132	0.116858	0.122758	0.123964	0.124879	0.125941	0.116858	0.129454	0.148611	0.185216	0.213584	0.116858	0.1168	0.130565	0.163308	0.193912
206	0.119378	0.143269	0.168701	0.213988	0.233855	0.119378	0.122218	0.12016	0.128229	0.13155	0.119378	0.129945	0.151022	0.192466	0.218615	0.119378	0.114317	0.128139	0.159639	0.19098
207	0.119322	0.150667	0.168362	0.207491	0.237511	0.119322	0.125075	0.124521	0.121355	0.136742	0.119322	0.130735	0.142717	0.192061	0.212776	0.119322	0.11664	0.129722	0.150111	0.192636
208	0.123774	0.147442	0.170721	0.216338	0.242774	0.123774	0.130296	0.123764	0.122832	0.137496	0.123774	0.125101	0.143012	0.188815	0.213936	0.123774	0.116723	0.126564	0.156419	0.194377
209	0.11956	0.144807	0.170161	0.214166	0.237339	0.11956	0.119868	0.125523	0.127926	0.133936	0.11956	0.124576	0.144551	0.191443	0.20907	0.11956	0.113356	0.128838	0.158786	0.187021
210	0.124134	0.146546	0.173261	0.208943	0.233046	0.124134	0.131741	0.118242	0.122184	0.127854	0.124134	0.127772	0.141942	0.193183	0.210905	0.124134	0.108422	0.126621	0.160094	0.18801
211	0.123974	0.144421	0.176302	0.211792	0.239013	0.123974	0.125832	0.125989	0.124361	0.134938	0.123974	0.125139	0.145279	0.188938	0.216616	0.123974	0.125713	0.128712	0.153218	0.192926
212	0.12376	0.15388	0.16333	0.206631	0.233238	0.12376	0.119433	0.11927	0.123779	0.131513	0.12376	0.123531	0.144814	0.187871	0.212863	0.12376	0.113185	0.132265	0.153069	0.187278
213	0.123305	0.138734	0.170676	0.210277	0.23605	0.123305	0.121234	0.122105	0.12301	0.13325	0.123305	0.121602	0.141466	0.198791	0.216321	0.123305	0.112002	0.130855	0.159754	0.183095
214	0.119635	0.143214	0.168154	0.207301	0.22911	0.119635	0.124091	0.123599	0.12612	0.136609	0.119635	0.125223	0.145633	0.187877	0.217335	0.119635	0.113913	0.127128	0.155426	0.187765
215	0.121328	0.145613	0.167905	0.212335	0.235115	0.121328	0.124481	0.118137	0.124175	0.130355	0.121328	0.128657	0.140762	0.192708	0.213946	0.121328	0.113239	0.131394	0.159062	0.185216
216	0.124998	0.148199	0.167254	0.212302	0.237976	0.124998	0.127976	0.120306	0.120515	0.133208	0.124998	0.127921	0.142169	0.192629	0.215782	0.124998	0.116777	0.124044	0.156052	0.183592
217	0.116627	0.143543	0.170114	0.206767	0.233951	0.116627	0.12006	0.118695	0.122913	0.129652	0.116627	0.122833	0.14065	0.186393	0.208771	0.116627	0.111502	0.124107	0.154273	0.186187
218	0.12356	0.141204	0.164563	0.211179	0.234261	0.12356	0.123037	0.123611	0.123897	0.137366	0.12356	0.124961	0.141148	0.190853	0.210861	0.12356	0.118557	0.127668	0.156351	0.185398
219	0.121119	0.148765	0.167321	0.208009	0.241782	0.121119	0.123992	0.127027	0.125194	0.134547	0.121119	0.120543	0.147403	0.180428	0.209491	0.121119	0.109599	0.123755	0.151287	0.179675
220	0.111425	0.146361	0.168619	0.211276	0.23824	0.111425	0.126586	0.121382	0.125432	0.133706	0.111425	0.124085	0.145055	0.181589	0.209804	0.111425	0.114123	0.123617	0.152423	0.185859
221	0.119895	0.147148	0.170174	0.206184	0.230611	0.119895	0.124169	0.126445	0.124073	0.132161	0.119895	0.125688	0.142539	0.189605	0.210796	0.119895	0.116048	0.126728	0.155454	0.180159
222	0.117371	0.141572	0.170741	0.205824	0.233907	0.117371	0.128868	0.118163	0.117034	0.136005	0.117371	0.128712	0.144687	0.182733	0.207556	0.117371	0.119217	0.128195	0.148135	0.185212
223	0.120679	0.142471	0.170413	0.212936	0.235981	0.120679	0.1222	0.122301	0.122893	0.128792	0.120679	0.127394	0.141047	0.185738	0.208984	0.120679	0.116396	0.123421	0.157986	0.17251
224	0.121365	0.14572	0.16696	0.202256	0.240307	0.121365	0.131729	0.124743	0.121858	0.13073	0.121365	0.127568	0.139555	0.183303	0.213153	0.121365	0.115922	0.12189	0.146995	0.191002
225	0.113972	0.136445	0.160577	0.205614	0.236868	0.113972	0.120816	0.125922	0.124736	0.133543	0.113972	0.127918	0.137458	0.19218	0.211459	0.113972	0.111899	0.123283	0.149131	0.184195
226	0.122286	0.140422	0.171174	0.206085	0.232075	0.122286	0.122012	0.118597	0.125294	0.129616	0.122286	0.120808	0.138217	0.183867	0.210682	0.122286	0.112525	0.127329	0.15042	0.184428
227	0.118609	0.135924	0.163866	0.202703	0.236475	0.118609	0.119835	0.121745	0.121705	0.129559	0.118609	0.123274	0.143808	0.185241	0.208774	0.118609	0.110543	0.124794	0.15462	0.177495
228	0.121053	0.135948	0.164906	0.210457	0.230222	0.121053	0.120822	0.124691	0.123487	0.125907	0.121053	0.122662	0.132978	0.184028	0.208237	0.121053	0.112929	0.129022	0.148997	0.179987
229	0.119679	0.137401	0.168221	0.202366	0.237099	0.119679	0.119233	0.12699	0.121833	0.128265	0.119679	0.126257	0.139065	0.181779	0.212916	0.119679	0.11644	0.12293	0.153152	0.18356
230	0.11339	0.142464	0.159354	0.207035	0.230239	0.11339	0.122855	0.11948	0.113865	0.124206	0.11339	0.129375	0.14205	0.178784	0.213713	0.11339	0.116586	0.126318	0.151313	0.190425
231	0.116255	0.132953	0.165473	0.206129	0.233704	0.116255	0.120161	0.115219	0.126379	0.129544	0.116255	0.122087	0.139522	0.176392	0.203472	0.116255	0.112179	0.122445	0.145466	0.182693
232	0.121395	0.135153	0.167367	0.201771	0.23725	0.121395	0.120865	0.118892	0.124256	0.133282	0.121395	0.119635	0.134533	0.183733	0.205176	0.121395	0.110065	0.119194	0.152966	0.176378
233	0.116135	0.141872	0.160381	0.204394	0.234976	0.116135	0.118321	0.117496	0.119025	0.130255	0.116135	0.117758	0.135176	0.183589	0.20283	0.116135	0.115712	0.121844	0.144404	0.187959
234	0.116925	0.139204	0.16181	0.210982	0.23006	0.116925	0.123577	0.120393	0.126219	0.123577	0.116925	0.122679	0.135801	0.183031	0.209948	0.116925	0.117304	0.126968	0.152677	0.182812
235	0.117552	0.135334	0.163319	0.199168	0.227175	0.117552	0.122391	0.118323	0.118283	0.128369	0.117552	0.121941	0.139301	0.176854	0.202117	0.117552	0.110586	0.120441	0.149558	0.177462
236	0.116131	0.139298	0.16764	0.20695	0.234299	0.116131	0.127057	0.120613	0.127218	0.130293	0.116131	0.120111	0.130665	0.180397	0.21223	0.116131	0.109342	0.122165	0.151463	0.177153
237	0.114648	0.134427	0.165256	0.211064	0.227456	0.114648	0.119938	0.116542	0.117059	0.127766	0.114648	0.124741	0.139619	0.180916	0.206428	0.114648	0.106968	0.127883	0.147277	0.18121
238	0.114087	0.141552	0.167285	0.205709	0.230265	0.114087	0.116712	0.123173	0.120042	0.120757	0.114087	0.124099	0.138587	0.184228	0.207555	0.114087	0.114694	0.124375	0.150079	0.177999
239	0.121465	0.140623	0.166156	0.209278	0.235672	0.121465	0.117422	0.121672	0.116748	0.130165	0.121465	0.124179	0.135606	0.176756	0.209342	0.121465	0.113028	0.122682	0.148852	0.179359
240	0.120176	0.134885	0.164531	0.207562	0.22692	0.120176	0.114703	0.118446	0.125311	0.12228	0.120176	0.119975	0.134323	0.179889	0.202925	0.120176	0.110427	0.120832	0.148108	0.181492
241	0.120786	0.139673	0.155566	0.200983	0.233352	0.120786	0.113253	0.123248	0.121973	0.128737	0.120786	0.118311	0.141043	0.178534	0.201634	0.120786	0.110549	0.123616	0.142326	0.173026
242	0.113827	0.135858	0.162788	0.200831	0.225917	0.113827	0.123543	0.123376	0.118739	0.124087	0.113827	0.117605	0.134061	0.183014	0.202568	0.113827	0.116838	0.11879	0.148414	0.18035
243	0.118243	0.13562	0.161918	0.198249	0.230669	0.118243	0.122362	0.121972	0.1235	0.124142	0.118243	0.124635	0.135321	0.178324	0.210747	0.118243	0.118263	0.129128	0.143209	0.179904
244	0.116281	0.134854	0.164537	0.211947	0.234673	0.116281	0.121727	0.112991	0.120584	0.125244	0.116281	0.124895	0.13487	0.178574	0.205427	0.116281	0.108361	0.12315	0.148753	0.175369
245	0.118387	0.140026	0.159849	0.202528	0.234559	0.118387	0.124542	0.118531	0.120142	0.129904	0.118387	0.117893	0.136209	0.174415	0.206453	0.118387	0.115062	0.112057	0.148029	0.176911
246	0.110465	0.133048	0.163684	0.206625	0.232297	0.110465	0.123008	0.122858	0.11703	0.124139	0.110465	0.120805	0.133596	0.182004	0.20772	0.110465	0.112167	0.121031	0.146706	0.17601
247	0.116896	0.136689	0.163096	0.201044	0.234786	0.116896	0.120781	0.121201	0.115732	0.127593	0.116896	0.126325	0.135813	0.178735	0.20197	0.116896	0.113977	0.121282	0.140766	0.174063
248	0.109537	0.134694	0.156921	0.205493	0.23332	0.109537	0.123148	0.117752	0.114689	0.130538	0.109537	0.11927	0.132318	0.173432	0.199238	0.109537	0.116286	0.121096	0.151877	0.177968
249	0.109856	0.131202	0.161267	0.201465	0.230944	0.109856	0.118479	0.115387	0.116034	0.126677	0.109856	0.11716	0.132578	0.178748	0.209705	0.109856	0.103881	0.119715	0.14503	0.182194
250	0.120884	0.135871	0.154445	0.201988	0.233562	0.120884	0.121156	0.120604	0.114161	0.118828	0.120884	0.11819	0.131418	0.1799	0.1985	0.120884	0.105577	0.11493	0.144631	0.182479
251	0.122525	0.136641	0.161608	0.20284	0.227744	0.122525	0.124671	0.122182	0.118733	0.124754	0.122525	0.127384	0.1324	0.176134	0.205421	0.122525	0.112918	0.123459	0.145258	0.180255
252	0.119966	0.134627	0.155491	0.21325	0.229195	0.119966	0.123653	0.117911	0.117894	0.124365	0.119966	0.120198	0.132027	0.17317	0.202166	0.119966	0.108939	0.123523	0.151824	0.176221
253	0.115652	0.140165	0.165529	0.213072	0.229522	0.115652	0.11522	0.121813	0.119042	0.126293	0.115652	0.121644	0.135172	0.180484	0.201301	0.115652	0.106381	0.116447	0.139805	0.172882
254	0.116401	0.134822	0.161035	0.207481	0.228708	0.116401	0.110706	0.119341	0.113457	0.120688	0.116401	0.11717	0.126868	0.18094	0.199408	0.116401	0.105715	0.115535	0.145574	0.175528
255	0.116403	0.134151	0.157771	0.195468	0.224032	0.116403	0.117821	0.118573	0.112438	0.124464	0.116403	0.118517	0.1371	0.173106	0.206884	0.116403	0.113463	0.120831	0.13766	0.176509
256	0.110477	0.136171	0.158933	0.201189	0.227473	0.110477	0.123501	0.119587	0.116929	0.121735	0.110477	0.115134	0.135497	0.164811	0.200193	0.110477	0.108942	0.114123	0.141204	0.173337
257	0.109145	0.134757	0.158472	0.204316	0.225812	0.109145	0.117415	0.115547	0.11603	0.123179	0.109145	0.120613	0.131669	0.170128	0.206297	0.109145	0.110074	0.117701	0.140675	0.178937
258	0.111623	0.129651	0.158096	0.195927	0.230983	0.111623	0.117795	0.112124	0.112346	0.12086	0.111623	0.124298	0.131438	0.168977	0.203316	0.111623	0.117145	0.116128	0.13951	0.169051
259	0.119097	0.131266	0.160482	0.199593	0.227571	0.119097	0.120626	0.113732	0.111593	0.132197	0.119097	0.116636	0.126875	0.173434	0.198884	0.119097	0.111691	0.115665	0.139798	0.174762
260	0.117348	0.135885	0.16147	0.202575	0.22579	0.117348	0.117577	0.121205	0.113137	0.119903	0.117348	0.122339	0.130208	0.174431	0.204386	0.117348	0.109613	0.125134	0.143146	0.168492
261	0.113223	0.134224	0.161794	0.196774	0.226029	0.113223	0.120281	0.116624	0.113563	0.121709	0.113223	0.117268	0.12997	0.174211	0.200681	0.113223	0.112711	0.114345	0.141285	0.174491
262	0.118483	0.12963	0.155445	0.199381	0.232545	0.118483	0.119389	0.116907	0.115615	0.123203	0.118483	0.121526	0.12614	0.173697	0.198853	0.118483	0.108451	0.118014	0.138227	0.169413
263	0.114775	0.13399	0.156708	0.198666	0.229629	0.114775	0.116411	0.116723	0.119631	0.121971	0.114775	0.119382	0.134181	0.174248	0.203703	0.114775	0.110082	0.121512	0.134533	0.165977
264	0.118503	0.133315	0.159304	0.201237	0.230808	0.118503	0.120922	0.115531	0.112773	0.119733	0.118503	0.115402	0.125774	0.175874	0.203284	0.118503	0.110666	0.116862	0.138021	0.174869
265	0.115325	0.132117	0.148699	0.20049	0.226303	0.115325	0.119514	0.11846	0.116775	0.117347	0.115325	0.116055	0.130633	0.173226	0.202034	0.115325	0.104523	0.117643	0.139541	0.169859
266	0.11911	0.125186	0.151576	0.199636	0.2285	0.11911	0.118338	0.11516	0.119754	0.11864	0.11911	0.115329	0.128545	0.177875	0.201959	0.11911	0.102939	0.120006	0.145332	0.171209
267	0.121145	0.127866	0.150235	0.200826	0.223822	0.121145	0.116557	0.113397	0.113704	0.119857	0.121145	0.117012	0.125141	0.17444	0.203353	0.121145	0.11111	0.11686	0.135329	0.16745
268	0.114219	0.130617	0.157883	0.196533	0.236525	0.114219	0.115406	0.121488	0.117067	0.115189	0.114219	0.119264	0.130596	0.171907	0.205026	0.114219	0.109818	0.118757	0.135307	0.172696
269	0.109206	0.130748	0.154212	0.197903	0.226414	0.109206	0.121039	0.120686	0.117841	0.118698	0.109206	0.125476	0.129261	0.176568	0.199414	0.109206	0.109013	0.117451	0.139293	0.171653
270	0.115195	0.128878	0.155564	0.193143	0.231388	0.115195	0.118395	0.119202	0.11557	0.116874	0.115195	0.12189	0.127822	0.168127	0.2003	0.115195	0.107797	0.11729	0.140197	0.169809
271	0.11035	0.130237	0.152239	0.197988	0.227504	0.11035	0.115114	0.118932	0.115741	0.12287	0.11035	0.122625	0.128518	0.167429	0.19969	0.11035	0.105158	0.116684	0.142298	0.169297
272	0.119798	0.131584	0.152476	0.195936	0.220914	0.119798	0.119909	0.117504	0.116026	0.119472	0.119798	0.116355	0.133013	0.167899	0.201012	0.119798	0.105916	0.118557	0.13823	0.166411
273	0.114729	0.128094	0.148115	0.192495	0.224973	0.114729	0.11786	0.118331	0.115061	0.119505	0.114729	0.110552	0.137155	0.174498	0.195993	0.114729	0.111489	0.112526	0.12926	0.171969
274	0.10686	0.121568	0.153929	0.198747	0.229604	0.10686	0.119806	0.11738	0.11424	0.117684	0.10686	0.118556	0.129426	0.163767	0.201226	0.10686	0.109758	0.116921	0.143479	0.169432
275	0.116231	0.126493	0.151506	0.194623	0.223366	0.116231	0.117192	0.12273	0.117588	0.116646	0.116231	0.117291	0.128247	0.172115	0.196449	0.116231	0.112445	0.120303	0.141353	0.169895
276	0.119185	0.132839	0.154961	0.200589	0.233563	0.119185	0.113183	0.11368	0.114326	0.11936	0.119185	0.114438	0.12848	0.167697	0.202914	0.119185	0.110985	0.117387	0.136713	0.170632
277	0.109152	0.129838	0.151556	0.19626	0.228031	0.109152	0.119723	0.119752	0.115455	0.120261	0.109152	0.117314	0.124005	0.165839	0.198854	0.109152	0.113151	0.117325	0.13322	0.168193
278	0.120956	0.128232	0.1486	0.199193	0.224803	0.120956	0.110807	0.116722	0.116791	0.116236	0.120956	0.109862	0.12425	0.175944	0.199818	0.120956	0.108736	0.112403	0.14188	0.169864
279	0.110235	0.133497	0.152297	0.199069	0.225436	0.110235	0.119444	0.113685	0.107978	0.119474	0.110235	0.113539	0.139399	0.168429	0.203251	0.110235	0.102717	0.115301	0.135522	0.168267
280	0.11566	0.120865	0.147116	0.199746	0.22804	0.11566	0.118244	0.114838	0.108443	0.119179	0.11566	0.114753	0.125486	0.167917	0.199108	0.11566	0.104034	0.109282	0.134116	0.169117
281	0.115906	0.134531	0.155334	0.189931	0.226627	0.115906	0.115385	0.117896	0.109369	0.12004	0.115906	0.115907	0.126003	0.167748	0.203073	0.115906	0.109956	0.116702	0.139005	0.167625
282	0.116317	0.126163	0.154785	0.199602	0.225203	0.116317	0.119438	0.111286	0.116519	0.119333	0.116317	0.114	0.127806	0.164623	0.195728	0.116317	0.109563	0.112889	0.136584	0.169837
283	0.114635	0.130704	0.148436	0.191588	0.222705	0.114635	0.119977	0.112867	0.1138	0.119536	0.114635	0.122762	0.125884	0.169436	0.191418	0.114635	0.103438	0.115385	0.133547	0.166866
284	0.1184	0.131688	0.155674	0.195583	0.219062	0.1184	0.112929	0.113034	0.115049	0.120786	0.1184	0.11718	0.131431	0.165848	0.195935	0.1184	0.104215	0.114225	0.137885	0.166301
285	0.11559	0.133637	0.148101	0.197184	0.220691	0.11559	0.116244	0.115707	0.115907	0.116236	0.11559	0.111892	0.119093	0.169724	0.199227	0.11559	0.109049	0.113763	0.13216	0.162274
286	0.117439	0.126326	0.152217	0.19031	0.221925	0.117439	0.123941	0.117749	0.109631	0.118134	0.117439	0.113671	0.121845	0.167906	0.191332	0.117439	0.107189	0.117107	0.137312	0.166803
287	0.115576	0.121182	0.150758	0.194005	0.227574	0.115576	0.114856	0.116704	0.11589	0.114929	0.115576	0.116789	0.125076	0.163435	0.198251	0.115576	0.108655	0.117409	0.1346	0.168144
288	0.117525	0.131235	0.151348	0.196238	0.224715	0.117525	0.121705	0.115411	0.117436	0.11512	0.117525	0.114729	0.129868	0.161569	0.196391	0.117525	0.10566	0.121743	0.131487	0.160971
289	0.117685	0.126496	0.149185	0.202183	0.220894	0.117685	0.111483	0.117817	0.113862	0.12015	0.117685	0.115993	0.121238	0.163272	0.196038	0.117685	0.110024	0.122123	0.135857	0.161764
290	0.116376	0.125597	0.154879	0.194216	0.219481	0.116376	0.115551	0.112718	0.10697	0.112056	0.116376	0.112379	0.123867	0.162497	0.197286	0.116376	0.109526	0.112644	0.136459	0.163663
291	0.114231	0.124491	0.151584	0.189215	0.229885	0.114231	0.115527	0.113754	0.109262	0.116113	0.114231	0.111889	0.130958	0.160384	0.194884	0.114231	0.105924	0.109988	0.135677	0.159321
292	0.118945	0.122312	0.152989	0.197176	0.227364	0.118945	0.121362	0.111605	0.117436	0.120129	0.118945	0.114501	0.126675	0.167664	0.200155	0.118945	0.107186	0.109499	0.137347	0.167114
293	0.119066	0.128574	0.149845	0.192773	0.22459	0.119066	0.107952	0.108448	0.112867	0.114618	0.119066	0.112347	0.128201	0.170636	0.199442	0.119066	0.111595	0.11283	0.137128	0.160795
294	0.106969	0.124213	0.154605	0.189972	0.222471	0.106969	0.117743	0.116741	0.120241	0.119121	0.106969	0.116254	0.130343	0.164185	0.194424	0.106969	0.108527	0.113451	0.132071	0.164539
295	0.110758	0.131184	0.147664	0.190266	0.221709	0.110758	0.115852	0.113402	0.115659	0.114422	0.110758	0.117815	0.126862	0.163728	0.197683	0.110758	0.107242	0.105709	0.133269	0.167477
296	0.113715	0.123759	0.140594	0.190775	0.229884	0.113715	0.114189	0.117965	0.109476	0.115396	0.113715	0.113562	0.12889	0.156866	0.191647	0.113715	0.108736	0.114717	0.126786	0.160699
297	0.11426	0.12417	0.14623	0.195702	0.217586	0.11426	0.117649	0.115486	0.110935	0.112858	0.11426	0.117889	0.119026	0.163084	0.191539	0.11426	0.103351	0.113343	0.132644	0.159665
298	0.109925	0.126432	0.144961	0.192686	0.222493	0.109925	0.116605	0.114299	0.114311	0.112977	0.109925	0.117072	0.121152	0.163404	0.187819	0.109925	0.107122	0.113276	0.132818	0.159827
299	0.115542	0.129184	0.15139	0.193911	0.223403	0.115542	0.112447	0.113022	0.121746	0.111965	0.115542	0.117114	0.124802	0.163705	0.197195	0.115542	0.110011	0.108294	0.130198	0.161396
300	0.117252	0.123397	0.146204	0.193869	0.225818	0.117252	0.115063	0.113356	0.110659	0.118202	0.117252	0.111671	0.129125	0.158328	0.190876	0.117252	0.105917	0.110529	0.127197	0.162324
301	0.112948	0.123992	0.143404	0.190408	0.220847	0.112948	0.115458	0.114548	0.113335	0.115753	0.112948	0.11201	0.121835	0.163588	0.196342	0.112948	0.108088	0.116278	0.130842	0.161255
302	0.114888	0.124825	0.141729	0.185876	0.219435	0.114888	0.115476	0.116801	0.118291	0.111837	0.114888	0.114049	0.125653	0.166609	0.197051	0.114888	0.104268	0.10816	0.140051	0.163955
303	0.114256	0.122245	0.149328	0.195553	0.222846	0.114256	0.113681	0.118502	0.110667	0.115598	0.114256	0.118706	0.126986	0.161464	0.19139	0.114256	0.101873	0.111425	0.131201	0.160894
304	0.115199	0.125731	0.145932	0.19191	0.225996	0.115199	0.115975	0.119238	0.117168	0.114708	0.115199	0.116017	0.126388	0.160725	0.197835	0.115199	0.109169	0.112708	0.131419	0.16334
305	0.103214	0.122726	0.148977	0.188194	0.220418	0.103214	0.117445	0.119385	0.112045	0.118436	0.103214	0.117279	0.125036	0.166512	0.191006	0.103214	0.108219	0.111162	0.126828	0.16247
306	0.116592	0.128482	0.143714	0.194339	0.220071	0.116592	0.114507	0.114443	0.114681	0.114065	0.116592	0.117094	0.124601	0.155751	0.198266	0.116592	0.100847	0.112256	0.135849	0.160367
307	0.111813	0.131918	0.144244	0.194844	0.218239	0.111813	0.111605	0.118193	0.115195	0.112461	0.111813	0.116564	0.129001	0.164555	0.193055	0.111813	0.10564	0.11274	0.129597	0.162819
308	0.117546	0.121864	0.141365	0.189906	0.216321	0.117546	0.116743	0.115603	0.103085	0.112201	0.117546	0.110489	0.118471	0.168501	0.193814	0.117546	0.10674	0.113623	0.129445	0.160197
309	0.104531	0.121612	0.143843	0.190163	0.226961	0.104531	0.117171	0.113222	0.116762	0.108725	0.104531	0.113351	0.119957	0.162492	0.195035	0.104531	0.108174	0.109696	0.130283	0.162179
310	0.110593	0.130742	0.144049	0.197387	0.218841	0.110593	0.11827	0.109492	0.12171	0.116028	0.110593	0.110361	0.123134	0.158112	0.191775	0.110593	0.10781	0.107823	0.132021	0.163264
311	0.117321	0.121684	0.149482	0.188757	0.217284	0.117321	0.114477	0.111681	0.115134	0.120435	0.117321	0.111582	0.125323	0.158421	0.190061	0.117321	0.108945	0.105795	0.12929	0.1623
312	0.117732	0.127627	0.14421	0.187918	0.218667	0.117732	0.11518	0.111458	0.113717	0.116709	0.117732	0.1178	0.120126	0.160454	0.193204	0.117732	0.101343	0.111967	0.131323	0.158046
313	0.113345	0.119946	0.141578	0.189053	0.222964	0.113345	0.113951	0.116431	0.112831	0.111372	0.113345	0.110524	0.121839	0.157444	0.193825	0.113345	0.102902	0.109283	0.138502	0.158146
314	0.109794	0.117037	0.143703	0.187148	0.224107	0.109794	0.113153	0.118148	0.109655	0.115339	0.109794	0.108935	0.120101	0.159118	0.191483	0.109794	0.0980186	0.115675	0.133626	0.157106
315	0.1107	0.118219	0.150904	0.19189	0.220466	0.1107	0.116054	0.115355	0.109202	0.117754	0.1107	0.115207	0.126606	0.161157	0.186654	0.1107	0.10433	0.113783	0.129778	0.158694
316	0.112929	0.126652	0.140044	0.191412	0.226802	0.112929	0.115466	0.111397	0.111389	0.113458	0.112929	0.115342	0.124806	0.165223	0.192294	0.112929	0.103075	0.108108	0.131162	0.161857
317	0.104773	0.129909	0.141338	0.187007	0.219961	0.104773	0.120143	0.119517	0.116769	0.115727	0.104773	0.117115	0.121734	0.163767	0.194816	0.104773	0.101819	0.108074	0.128099	0.161782
318	0.110689	0.119331	0.136913	0.191148	0.222481	0.110689	0.113984	0.111835	0.110653	0.117816	0.110689	0.114162	0.120548	0.156517	0.185703	0.110689	0.111816	0.115378	0.12978	0.162658
319	0.116943	0.122996	0.140439	0.180748	0.216825	0.116943	0.115176	0.117571	0.113789	0.112988	0.116943	0.107394	0.121445	0.15395	0.186129	0.116943	0.112601	0.109931	0.132378	0.156558
320	0.108474	0.123029	0.137253	0.183207	0.217473	0.108474	0.108905	0.112681	0.107491	0.114911	0.108474	0.111828	0.122325	0.155496	0.186929	0.108474	0.106439	0.113375	0.129907	0.15325
321	0.109506	0.122311	0.139244	0.186636	0.217366	0.109506	0.111678	0.111018	0.11514	0.113963	0.109506	0.10868	0.12315	0.159099	0.193615	0.109506	0.107174	0.109784	0.133606	0.161517
322	0.112665	0.123729	0.142331	0.187909	0.21752	0.112665	0.119389	0.116074	0.110671	0.115116	0.112665	0.114938	0.120198	0.156032	0.190065	0.112665	0.100166	0.114157	0.12792	0.156209
323	0.107919	0.122217	0.139428	0.191367	0.217591	0.107919	0.117181	0.112599	0.109771	0.102515	0.107919	0.115366	0.120864	0.154951	0.188439	0.107919	0.109022	0.111856	0.124536	0.157829
324	0.104993	0.125888	0.139064	0.187912	0.218994	0.104993	0.111251	0.113271	0.112477	0.112661	0.104993	0.108432	0.117132	0.160515	0.18531	0.104993	0.106007	0.10649	0.132296	0.158928
325	0.105826	0.112583	0.141432	0.189105	0.212351	0.105826	0.114325	0.116933	0.105989	0.111697	0.105826	0.112566	0.121189	0.16076	0.18862	0.105826	0.104479	0.108531	0.130251	0.157706
326	0.112234	0.118743	0.14269	0.186847	0.21903	0.112234	0.123443	0.112417	0.113666	0.113658	0.112234	0.112376	0.119832	0.16132	0.186425	0.112234	0.108854	0.110672	0.12729	0.158419
327	0.111815	0.12163	0.133933	0.186825	0.218787	0.111815	0.114306	0.110857	0.112325	0.117685	0.111815	0.11014	0.118427	0.161676	0.184311	0.111815	0.10933	0.112141	0.123331	0.16099
328	0.113781	0.124883	0.140436	0.181586	0.220916	0.113781	0.116166	0.118962	0.111637	0.111652	0.113781	0.115126	0.117801	0.156859	0.18894	0.113781	0.108636	0.109967	0.126486	0.154208
329	0.114581	0.117394	0.1347	0.18541	0.222193	0.114581	0.119016	0.108593	0.110029	0.112152	0.114581	0.107692	0.125404	0.159994	0.188542	0.114581	0.111776	0.106468	0.127775	0.152796
330	0.116336	0.121691	0.139427	0.189452	0.218827	0.116336	0.115447	0.109175	0.112079	0.105517	0.116336	0.104237	0.124236	0.151377	0.190746	0.116336	0.101614	0.104352	0.124385	0.155008
331	0.109829	0.122676	0.142621	0.184585	0.216318	0.109829	0.110983	0.112054	0.109641	0.115232	0.109829	0.109784	0.115764	0.1529	0.185881	0.109829	0.107568	0.10544	0.134479	0.15753
332	0.113419	0.12252	0.140774	0.194177	0.217011	0.113419	0.116232	0.116616	0.111016	0.112485	0.113419	0.113483	0.120148	0.152792	0.191392	0.113419	0.102992	0.106053	0.121214	0.153418
333	0.112781	0.119421	0.139796	0.187541	0.222654	0.112781	0.112078	0.113569	0.115779	0.114285	0.112781	0.113924	0.119625	0.155298	0.186061	0.112781	0.10623	0.106645	0.124703	0.1561
334	0.113539	0.120165	0.140805	0.185827	0.221188	0.113539	0.11399	0.10857	0.109232	0.116013	0.113539	0.108554	0.123919	0.152095	0.187028	0.113539	0.100165	0.111829	0.127306	0.15581
335	0.109913	0.118829	0.141566	0.183998	0.213977	0.109913	0.114118	0.110275	0.107249	0.114125	0.109913	0.112872	0.113342	0.155273	0.189438	0.109913	0.105665	0.110168	0.1283	0.152653
336	0.112926	0.126259	0.145657	0.184674	0.210927	0.112926	0.120592	0.109266	0.114145	0.114996	0.112926	0.112195	0.11823	0.14924	0.184181	0.112926	0.106013	0.111426	0.119031	0.15456
337	0.109635	0.119734	0.139759	0.185349	0.213918	0.109635	0.114366	0.113128	0.113419	0.111113	0.109635	0.110905	0.123563	0.155151	0.181468	0.109635	0.105652	0.108863	0.121048	0.151286
338	0.109831	0.118653	0.140144	0.186659	0.216862	0.109831	0.111995	0.106194	0.108129	0.113283	0.109831	0.112313	0.112938	0.150632	0.18287	0.109831	0.109298	0.108388	0.128599	0.152246
339	0.104658	0.119951	0.137524	0.187898	0.215176	0.104658	0.112197	0.113452	0.109607	0.111289	0.104658	0.11313	0.116207	0.152677	0.186763	0.104658	0.10436	0.109409	0.123424	0.157956
340	0.109512	0.117037	0.135538	0.182875	0.216812	0.109512	0.112082	0.113709	0.112673	0.106953	0.109512	0.112358	0.117098	0.151262	0.183451	0.109512		0.110136	0.12342	0.154396
341	0.106807	0.115906	0.138856	0.186696	0.217298	0.106807	0.114261	0.110996	0.106056	0.113529	0.106807	0.114258	0.11441	0.155387	0.183838	0.106807		0.109801	0.126382	0.15137
342	0.104117	0.121651	0.139505	0.181193	0.217054	0.104117	0.115479	0.115527	0.110174	0.111152	0.104117	0.109039	0.116945	0.151608	0.181399	0.104117		0.113655	0.126752	0.153161
343	0.108932	0.122437	0.13408	0.179189	0.21347	0.108932	0.11476	0.111903	0.109358	0.114183	0.108932	0.111446	0.120283	0.152242	0.188457	0.108932		0.107987	0.126698	0.157041
344	0.116201	0.116506	0.13831	0.182119	0.214007	0.116201	0.109395	0.111601	0.110799	0.106789	0.116201	0.109962	0.117624	0.157069	0.191358	0.116201		0.106581	0.120312	0.153446
345	0.106632	0.123138	0.142113	0.18498	0.212943	0.106632	0.105683	0.112314	0.103279	0.109424	0.106632	0.110486	0.114299	0.149392	0.195333	0.106632		0.112335	0.12257	0.153346
346	0.109769	0.120936	0.135153	0.180178	0.221879	0.109769	0.111076	0.111921	0.111534	0.107841	0.109769	0.10875	0.118218	0.152536	0.187921	0.109769		0.110101	0.12665	0.160002
347	0.112681	0.121989	0.137935	0.188028	0.21702	0.112681	0.113075	0.104732	0.114799	0.111364	0.112681	0.112563	0.120992	0.15606	0.185062	0.112681		0.110516	0.122368	0.150405
348	0.115782	0.111676	0.132613	0.18149	0.220189	0.115782	0.109538	0.111285	0.112142	0.110373	0.115782	0.10776	0.116115	0.151174	0.185833	0.115782		0.111417	0.126196	0.14872
349	0.110335	0.11801	0.138232	0.184079	0.214447	0.110335	0.114473	0.11247	0.112901	0.107591	0.110335	0.114201	0.116133	0.152407	0.18532	0.110335		0.10719	0.126749	0.148632
350	0.109858	0.116547	0.133547	0.183131	0.215477	0.109858	0.109553	0.114503	0.10726	0.108781	0.109858	0.110053	0.117099	0.155435	0.179928	0.109858		0.10534	0.119027	0.149255
351	0.1103	0.119189	0.133744	0.185877	0.211835	0.1103	0.118146	0.113443	0.110689	0.108883	0.1103	0.108322	0.118215	0.156048	0.184804	0.1103		0.10735	0.123562	0.146483
352	0.10977	0.112681	0.135123	0.187145	0.215182	0.10977	0.120167	0.106064	0.108052	0.11165	0.10977	0.109274	0.108333	0.153528	0.184676	0.10977		0.109543	0.120793	0.149057
353	0.108763	0.118297	0.136485	0.186114	0.211216	0.108763	0.112659	0.114968	0.109198	0.105873	0.108763	0.108832	0.11793	0.150346	0.184378	0.108763		0.106912	0.122782	0.148096
354	0.102484	0.119834	0.133642	0.185744	0.219838	0.102484	0.115108	0.110783	0.104815	0.116448	0.102484	0.112038	0.114184	0.15281	0.180745	0.102484		0.105471	0.122483	0.142609
355	0.116223	0.11924	0.136861	0.181938	0.218799	0.116223	0.11627	0.111164	0.107445	0.104086	0.116223	0.113368	0.116097	0.146322	0.183554	0.116223		0.107221	0.131281	0.146226
356	0.104149	0.119502	0.135685	0.175646	0.214005	0.104149	0.116023	0.106015	0.108627	0.119335	0.104149	0.114389	0.11391	0.149257	0.17954	0.104149		0.111114	0.1257	0.14568
357	0.106193	0.122429	0.137038	0.188862	0.2174	0.106193	0.11981	0.118649	0.106991	0.114153	0.106193	0.111304	0.118627	0.14981	0.180312	0.106193		0.108568	0.118209	0.15436
358	0.110618	0.114188	0.131228	0.175856	0.217818	0.110618	0.117162	0.105345	0.111323	0.117188	0.110618	0.107067	0.118367	0.152818	0.186853	0.110618		0.110928	0.12222	0.146393
359	0.108337	0.114814	0.137043	0.178814	0.214216	0.108337	0.113464	0.113153	0.109417	0.111481	0.108337	0.112209	0.114492	0.14756	0.175055	0.108337		0.105665	0.126852	0.150188
360	0.11069	0.11376	0.13651	0.184555	0.212363	0.11069	0.115952	0.112829	0.108176	0.119704	0.11069	0.108312	0.115103	0.14739	0.177121	0.11069		0.10422	0.121801	0.152939
361	0.10895	0.113274	0.135844	0.177008	0.213514	0.10895	0.108038	0.113214	0.109082	0.110197	0.10895	0.109187	0.115802	0.148309	0.185683	0.10895		0.10971	0.120978	0.143644
362	0.116543	0.123159	0.140772	0.180632	0.213688	0.116543	0.114976	0.111713	0.1059	0.102385	0.116543	0.104923	0.116788	0.148123	0.18664	0.116543		0.105415	0.119305	0.151508
363	0.110874	0.117795	0.132481	0.187186	0.209415	0.110874	0.113416	0.109715	0.109731	0.113854	0.110874	0.110104	0.118992	0.152043	0.185103	0.110874		0.104282	0.121505	0.146296
364	0.111085	0.115632	0.126924	0.182061	0.213216	0.111085	0.113265	0.111382	0.104869	0.105472	0.111085	0.109124	0.116515	0.146835	0.184582	0.111085		0.105033	0.120335	0.149106
365	0.110417	0.11736	0.136876	0.177862	0.215309	0.110417	0.118266	0.110802	0.106434	0.111315	0.110417	0.116171	0.111721	0.1486	0.183796	0.110417		0.108499	0.125517	0.145841
366	0.109571	0.115776	0.136684	0.185341	0.215762	0.109571	0.108873	0.110584	0.11104	0.10767	0.109571	0.107604	0.115415	0.150564	0.177556	0.109571		0.111785	0.121388	0.145566
367	0.106729	0.111653	0.131643	0.184466	0.216376	0.106729	0.113173	0.111064	0.110557	0.110305	0.106729	0.113399	0.117815	0.150124	0.178665	0.106729		0.106485	0.117116	0.147245
368	0.109445	0.121649	0.135817	0.178199	0.208905	0.109445	0.110105	0.112838	0.109966	0.107073	0.109445	0.112446	0.119113	0.145597	0.180452	0.109445		0.107825	0.120173	0.14636
369	0.111989	0.117994	0.13261	0.183507	0.209069	0.111989	0.112511	0.114359	0.109779	0.108383	0.111989	0.108764	0.111947	0.141143	0.184262	0.111989		0.110313	0.122322	0.144836
370	0.111703	0.114759	0.138349	0.184259	0.212757	0.111703	0.109926	0.108991	0.108568	0.112466	0.111703	0.116142	0.114252	0.146824	0.18106	0.111703		0.107491	0.116887	0.151875
371	0.10924	0.121177	0.135824	0.18029	0.216197	0.10924	0.111512	0.114499	0.108848	0.106751	0.10924	0.111712	0.114336	0.14833	0.181677	0.10924		0.106805	0.121484	0.148254
372	0.108661	0.113795	0.13441	0.182199	0.212313	0.108661	0.11664	0.110098	0.113146	0.110682	0.108661	0.115218	0.113971	0.144646	0.183988	0.108661		0.1095	0.121901	0.145147
373	0.110585	0.122029	0.13224	0.180975	0.209714	0.110585	0.11434	0.105987	0.113011	0.108278	0.110585	0.109203	0.106593	0.148374	0.181168	0.110585		0.105364	0.11834	0.146931
374	0.103934	0.11541	0.132673	0.183383	0.213211	0.103934	0.104552	0.114042	0.106451	0.110066	0.103934	0.106492	0.113915	0.143238	0.183432	0.103934		0.110342	0.119243	0.145075
375	0.10856	0.117994	0.129323	0.177631	0.212579	0.10856	0.111819	0.111517	0.112898	0.111566	0.10856	0.110745	0.111673	0.147123	0.181322	0.10856		0.111993	0.120444	0.14813
376	0.106457	0.119418	0.132936	0.18139	0.213869	0.106457	0.109173	0.111455	0.110868	0.103742	0.106457	0.114757	0.108231	0.15036	0.17828	0.106457		0.107992	0.120499	0.148199
377	0.110513	0.116495	0.137773	0.177784	0.212048	0.110513	0.103569	0.113272	0.104814	0.115807	0.110513	0.11062	0.116509	0.14369	0.173274	0.110513		0.113224	0.119128	0.14736
378	0.11253	0.121259	0.128293	0.178601	0.210208	0.11253	0.111738	0.114138	0.110809	0.106122	0.11253	0.109735	0.113525	0.143893	0.180152	0.11253		0.11628	0.116208	0.142181
379	0.112721	0.11884	0.130123	0.173026	0.213116	0.112721	0.111894	0.112265	0.111569	0.102342	0.112721	0.108894	0.114146	0.145761	0.179249	0.112721		0.10589	0.118588	0.148102
380	0.115456	0.118103	0.123987	0.178305	0.213779	0.115456	0.109962	0.113773	0.11028	0.114256	0.115456	0.114062	0.117218	0.14909	0.184389	0.115456		0.10875	0.110583	0.150325
381	0.111024	0.116977	0.132027	0.177218	0.209917	0.111024	0.111966	0.115439	0.110313	0.109342	0.111024	0.109745	0.114483	0.143171	0.182118	0.111024		0.104479	0.121572	0.148241
382	0.107749	0.115309	0.13011	0.181057	0.208696	0.107749	0.108762	0.113632	0.112338	0.111534	0.107749	0.107368	0.113557	0.154499	0.172965	0.107749		0.104893	0.119247	0.144241
383	0.109642	0.114207	0.132353	0.182866	0.20858	0.109642	0.11141	0.114658	0.109786	0.110496	0.109642	0.111339	0.113724	0.151502	0.180653	0.109642		0.107633	0.120342	0.140462
384	0.112193	0.113559	0.129908	0.17546	0.20623	0.112193	0.115687	0.109366	0.108345	0.111415	0.112193	0.10773	0.110591	0.152858	0.178821	0.112193		0.111288	0.113945	0.14282
385	0.105805	0.117284	0.127988	0.178945	0.210828	0.105805	0.112883	0.110942	0.108622	0.107488	0.105805	0.107073	0.117098	0.149788	0.1733	0.105805		0.111602	0.117361	0.145626
386	0.112332	0.115424	0.137327	0.176761	0.21044	0.112332	0.115134	0.108547	0.105648	0.106983	0.112332	0.104426	0.119604	0.155049	0.178111	0.112332		0.102881	0.118637	0.145766
387	0.102916	0.117217	0.130851	0.170283	0.211659	0.102916	0.105215	0.1082	0.108881	0.108764	0.102916	0.109484	0.111455	0.149473	0.175465	0.102916		0.106284	0.118338	0.138897
388	0.109229	0.113778	0.127939	0.177052	0.211509	0.109229	0.110419	0.112219	0.110518	0.108434	0.109229	0.114396	0.108679	0.142832	0.181639	0.109229		0.105941	0.119877	0.143309
389	0.107695	0.117122	0.126369	0.177913	0.210233	0.107695	0.116772	0.10924	0.110696	0.10428	0.107695	0.1041	0.113819	0.142209	0.174524	0.107695		0.109025	0.116585	0.145498
390	0.110347	0.113629	0.129646	0.17839	0.208402	0.110347	0.112289	0.106831	0.107537	0.112535	0.110347	0.111086	0.114244	0.151364	0.177245	0.110347		0.107872	0.120627	0.139317
391	0.106714	0.11567	0.128884	0.177347	0.209413	0.106714	0.116569	0.115262	0.106131	0.106589	0.106714	0.109822	0.109462	0.144835	0.170926	0.106714		0.106489	0.119132	0.138695
392	0.105883	0.114385	0.129722	0.178392	0.205249	0.105883	0.1092	0.10794	0.110399	0.10655	0.105883	0.109568	0.108545	0.138076	0.177163	0.105883		0.104735	0.120607	0.144771
393	0.1056	0.114663	0.127221	0.177448	0.210106	0.1056	0.110256	0.111348	0.109986	0.108051	0.1056	0.107	0.111127	0.151091	0.184485	0.1056		0.109326	0.116699	0.145209
394	0.10518	0.110082	0.132136	0.17396	0.21258	0.10518	0.110174	0.112211	0.107737	0.106882	0.10518	0.104279	0.113655	0.14245	0.17584	0.10518		0.10023	0.118529	0.140557
395	0.110077	0.11512	0.126811	0.172501	0.202593	0.110077	0.111955	0.112124	0.104492	0.111154	0.110077	0.1051	0.111951	0.139783	0.175096	0.110077		0.105666	0.116517	0.140734
396	0.106316	0.112087	0.126037	0.173709	0.212106	0.106316	0.11467	0.10648	0.102981	0.106813	0.106316	0.110904	0.107664	0.144989	0.171708	0.106316		0.109741	0.116155	0.142112
397	0.108709	0.128862	0.122171	0.180337	0.209257	0.108709	0.108216	0.111943	0.112667	0.109103	0.108709	0.1071	0.107626	0.14419	0.17482	0.108709		0.100835	0.117512	0.143888
398	0.110079	0.116887	0.125981	0.177836	0.207893	0.110079	0.113735	0.105778	0.104455	0.10742	0.110079	0.111351	0.111372	0.139702	0.173516	0.110079		0.110065	0.117138	0.143749
399	0.107291	0.117443	0.131667	0.178191	0.208242	0.107291	0.114924	0.111946	0.107952	0.106609	0.107291	0.113626	0.113723	0.142948	0.174202	0.107291		0.110847	0.111612	0.14019
400	0.104268	0.116272	0.126141	0.171817	0.207524	0.104268	0.114475	0.113075	0.11068	0.109506	0.104268	0.108164	0.112857	0.143725	0.170136	0.104268		0.101195	0.113489	0.14401
401	0.112631	0.111415	0.129504	0.177193	0.206342	0.112631	0.104366	0.107152	0.105203	0.110098	0.112631	0.111557	0.110305	0.145719	0.173185	0.112631		0.103874	0.119197	0.141396
402	0.110198	0.112151	0.128251	0.178204	0.207498	0.110198	0.11661	0.107963	0.104629	0.0995617	0.110198	0.110282	0.11075	0.136587	0.175143	0.110198		0.106439	0.114439	0.137603
403	0.110241	0.114885	0.127539	0.175418	0.201329	0.110241	0.110914	0.113154	0.111777	0.111498	0.110241	0.10733	0.109931	0.139553	0.177564	0.110241		0.106628	0.114025	0.135537
404	0.101739	0.111912	0.128842	0.177369	0.209705	0.101739	0.107101	0.111467	0.10481	0.103108	0.101739	0.110445	0.114897	0.140027	0.17169	0.101739		0.108407	0.113342	0.140595
405	0.106921	0.11297	0.128886	0.175691	0.203684	0.106921	0.113629	0.114002	0.107324	0.111493	0.106921	0.105981	0.11438	0.138362	0.173509	0.106921		0.105085	0.117004	0.13819
406	0.113637	0.116557	0.123237	0.173287	0.207806	0.113637	0.109378	0.108413	0.106812	0.11159	0.113637	0.10634	0.117677	0.14068	0.174128	0.113637		0.10146	0.112424	0.140977
407	0.109771	0.11665	0.117516	0.175163	0.209998	0.109771	0.109865	0.10829	0.111269	0.104624	0.109771	0.107751	0.115397	0.13994	0.173727	0.109771		0.105984	0.116332	0.141946
408	0.107283	0.110439	0.130084	0.167241	0.211462	0.107283	0.106302	0.107085	0.105701	0.115754	0.107283	0.113418	0.107655	0.134609	0.174253	0.107283		0.107476	0.105459	0.142328
409	0.104222	0.115313	0.126148	0.166864	0.205004	0.104222	0.114514	0.10414	0.108207	0.104148	0.104222	0.108799	0.111256	0.142064	0.175255	0.104222			0.111548	0.143158
410	0.105987	0.108618	0.128183	0.170211	0.207669	0.105987	0.110901	0.108559	0.114116	0.104312	0.105987	0.110914	0.11642	0.143924	0.17379	0.105987			0.114403	0.135803
411	0.109768	0.109087	0.127135	0.176283	0.207286	0.109768	0.114083	0.106111	0.104833	0.103644	0.109768	0.109248	0.113582	0.13428	0.170611	0.109768			0.112564	0.136704
412	0.109325	0.112313	0.128175	0.174231	0.208183	0.109325	0.11024	0.107307	0.10859	0.10811	0.109325	0.111634	0.108764	0.139046	0.170603	0.109325			0.108293	0.137376
413	0.107352	0.111259	0.124845	0.176981	0.207306	0.107352	0.104956	0.106358	0.103309	0.105597	0.107352	0.110018	0.112595	0.143555	0.173788	0.107352			0.114181	0.138766
414	0.111722	0.116698	0.127788	0.173285	0.206421	0.111722	0.112284	0.107031	0.108953	0.111424	0.111722	0.110172	0.112073	0.141386	0.169671	0.111722			0.115496	0.138396
415	0.11503	0.1077	0.135	0.171516	0.206393	0.11503	0.113623	0.107644	0.110373	0.105797	0.11503	0.10412	0.105608	0.141004	0.169432	0.11503			0.117114	0.139108
416	0.107649	0.113283	0.128654	0.172676	0.206698	0.107649	0.114734	0.10809	0.107927	0.108006	0.107649	0.111265	0.11024	0.134882	0.161379	0.107649			0.11929	0.134166
417	0.108753	0.10954	0.126056	0.170591	0.205192	0.108753	0.106874	0.106901	0.10414	0.110102	0.108753	0.107504	0.110438	0.133679	0.167685	0.108753			0.112331	0.137681
418	0.10658	0.107806	0.122463	0.16837	0.211995	0.10658	0.11421	0.112774	0.10696	0.106774	0.10658	0.107755	0.11505	0.138448	0.174654	0.10658			0.115798	0.139638
419	0.106753	0.11343	0.133889	0.17333	0.203097	0.106753	0.108714	0.106198	0.106176	0.119307	0.106753	0.110908	0.113261	0.139909	0.170554	0.106753			0.111016	0.137994
420	0.106412	0.108454	0.125418	0.171488	0.205738	0.106412	0.108708	0.109779	0.103617	0.106172	0.106412	0.105843	0.113484	0.137676	0.166343	0.106412			0.115268	0.13499
421	0.110704	0.109857	0.126855	0.170035	0.210952	0.110704	0.107747	0.112294	0.102631	0.109672	0.110704	0.107874	0.113638	0.137176	0.169327	0.110704			0.114477	0.138016
422	0.106158	0.111084	0.127269	0.171195	0.204269	0.106158	0.114868	0.110101	0.0982872	0.106653	0.106158	0.10913	0.10556	0.138749	0.169657	0.106158			0.117596	0.143135
423	0.108525	0.111835	0.124211	0.16576	0.202873	0.108525	0.102939	0.107958	0.110656	0.105355	0.108525	0.107086	0.106108	0.12659	0.16727	0.108525			0.117144	0.14322
424	0.111078	0.11719	0.124021	0.177576	0.206728	0.111078	0.118504	0.112676	0.104791	0.10569	0.111078	0.110724	0.109032	0.134438	0.166181	0.111078			0.117864	0.137154
425	0.106187	0.113069	0.122681	0.167254	0.207117	0.106187	0.108182	0.10909	0.105452	0.105802	0.106187	0.108913	0.112443	0.140529	0.16896	0.106187			0.118139	0.1355
426	0.105671	0.109837	0.119699	0.1828	0.210311	0.105671	0.110086	0.108224	0.101996	0.117984	0.105671	0.107407	0.110336	0.141057	0.169922	0.105671			0.115182	0.135669
427	0.109158	0.111164	0.127452	0.170422	0.212482	0.109158	0.104661	0.106762	0.107235	0.105308	0.109158	0.103049	0.106486	0.140779	0.16901	0.109158			0.112994	0.134797
428	0.10614	0.112818	0.12361	0.172905	0.204697	0.10614	0.106137	0.106347	0.104598	0.108945	0.10614	0.10532	0.110093	0.133604	0.171386	0.10614			0.116409	0.143785
429	0.102268	0.110144	0.12048	0.177029	0.208013	0.102268	0.109279	0.111316	0.10632	0.107524	0.102268	0.109982	0.114463	0.133804	0.166609	0.102268			0.114184	0.13489
430	0.107671	0.108803	0.123003	0.167103	0.209469	0.107671	0.110739	0.113699	0.108906	0.108309	0.107671	0.107181	0.109369	0.141911	0.170783	0.107671			0.115383	0.136143
431	0.106282	0.11297	0.123735	0.170861	0.20442	0.106282	0.10954	0.106327	0.104332	0.107163	0.106282	0.109547	0.104811	0.140292	0.167496	0.106282			0.112239	0.132507
432	0.103117	0.112766	0.127474	0.175123	0.203399	0.103117	0.114912	0.109555	0.100492	0.107768	0.103117	0.107372	0.111554	0.13171	0.166318	0.103117			0.111858	0.131922
433	0.102265	0.110768	0.120749	0.172686	0.203291	0.102265	0.107971	0.106237	0.104758	0.106958	0.102265	0.111444	0.110774	0.134536	0.171751	0.102265			0.110571	0.136894
434	0.109165	0.110008	0.123298	0.166813	0.203583	0.109165	0.10939	0.107722	0.104832	0.101442	0.109165	0.108682	0.113788	0.13572	0.169491	0.109165			0.119284	0.135366
435	0.10661	0.111216	0.127256	0.170414	0.201007	0.10661	0.106679	0.107247	0.105858	0.103806	0.10661	0.103718	0.108325	0.136897	0.16654	0.10661			0.107838	0.138504
436	0.102919	0.105461	0.121834	0.172509	0.206708	0.102919	0.108956	0.110139	0.108524	0.108237	0.102919	0.111727	0.108402	0.14103	0.160821	0.102919			0.110844	0.132161
437	0.104132	0.113298	0.124077	0.174204	0.206114	0.104132	0.108123	0.104482	0.106251	0.109643	0.104132	0.10262	0.110821	0.140543	0.17061	0.104132			0.118585	0.129732
438	0.102974	0.111263	0.124747	0.174089	0.204527	0.102974	0.10677	0.108564	0.106373	0.110002	0.102974	0.110947	0.106131	0.136576	0.166279	0.102974			0.112512	0.137719
439	0.105079	0.112119	0.123213	0.1703	0.206738	0.105079	0.105117	0.106139	0.105109	0.107415	0.105079	0.108094	0.112023	0.131189	0.169528	0.105079			0.111063	0.136303
440	0.105115	0.112211	0.12398	0.170575	0.211251	0.105115	0.112066	0.109949	0.0981425	0.109888	0.105115	0.102521	0.110969	0.13859	0.173862	0.105115			0.115086	0.133915
441	0.104465	0.104837	0.121785	0.170991	0.211418	0.104465	0.112759	0.108798	0.103837	0.105815	0.104465	0.107101	0.107706	0.135526	0.167057	0.104465			0.111106	0.133448
442	0.107192	0.113309	0.12403	0.168259	0.200596	0.107192	0.111564	0.108731	0.112804	0.0998347	0.107192	0.114605	0.101743	0.130186	0.168574	0.107192			0.117541	0.130947
443	0.109711	0.109375	0.12308	0.170317	0.209808	0.109711	0.109768	0.106129	0.103608	0.111607	0.109711	0.106035	0.105728	0.135199	0.166852	0.109711			0.112836	0.134505
444	0.108241	0.103679	0.118882	0.16789	0.204512	0.108241	0.107644	0.10478	0.108704	0.106921	0.108241	0.103999	0.111216	0.135562	0.165555	0.108241			0.115298	0.134127
445	0.106505	0.113716	0.124502	0.17899	0.203341	0.106505	0.110519	0.115872	0.106369	0.107936	0.106505	0.108154	0.108487	0.136961	0.171999	0.106505			0.108989	0.128708
446		0.111799	0.12184	0.170739	0.207593		0.107833	0.111707	0.113479	0.104658		0.11123	0.110145	0.134003	0.164634				0.113122	0.127472
447		0.11007	0.116968	0.167279	0.207297		0.113597	0.108531	0.103124	0.103042		0.107181	0.111051	0.134167	0.167017				0.110473	0.132067
448		0.113384	0.119163	0.175303	0.19893		0.117296	0.108169	0.107767	0.10201		0.10404	0.106795	0.136441	0.171494				0.111878	0.134466
449		0.107341	0.12453	0.170467	0.201763		0.109862	0.108817	0.112928	0.105678		0.107265	0.10094	0.133777	0.16601				0.108779	0.131636
450		0.111043	0.122576	0.168859	0.199358		0.11048	0.105766	0.105385	0.105958		0.106591	0.108434	0.132516	0.165136				0.112491	0.136371
451		0.10937	0.123404	0.167645	0.207942		0.114658	0.105834	0.104343	0.104614		0.107185	0.107081	0.135373	0.164238				0.112015	0.131321
452		0.113291	0.121943	0.166025	0.201582		0.103548	0.11017	0.107438	0.106814		0.106853	0.110523	0.137187	0.163485				0.109393	0.125721
453		0.112322	0.119328	0.167779	0.202617		0.105868	0.108409	0.103157	0.0995762		0.108498	0.108483	0.136376	0.162398				0.106472	0.13046
454		0.110833	0.119846	0.162935	0.200138		0.10951	0.105249	0.103719	0.104405		0.108915	0.103283	0.133519	0.169024				0.108449	0.134751
455		0.113882	0.121831	0.163915	0.19949		0.114201	0.1091	0.105814	0.104771		0.105205	0.108456	0.127737	0.164909				0.114292	0.133272
456		0.111028	0.117984	0.168196	0.205357		0.115261	0.104043	0.104213	0.103665		0.105188	0.109753	0.138303	0.166729				0.112017	0.135994
457		0.112005	0.121737	0.16516	0.199549		0.108613	0.107955	0.109501	0.103096		0.105568	0.103326	0.13856	0.165985				0.115411	0.132341
458		0.111506	0.126026	0.162679	0.199931		0.110948	0.107897	0.108411	0.101364		0.106963	0.113682	0.127566	0.165042				0.104314	0.129726
459		0.107023	0.122796	0.161022	0.198252		0.103542	0.107774	0.102737	0.0997302		0.101855	0.10828	0.135097	0.164855				0.112272	0.13565
460		0.11096	0.11895	0.165344	0.205286		0.107026	0.102388	0.104467	0.104723		0.106701	0.103995	0.130117	0.165425				0.110803	0.136721
461		0.110958	0.125065	0.163878	0.204038		0.113898	0.110378	0.10818	0.109546		0.109382	0.108704	0.133052	0.16266				0.108511	0.128884
462		0.107735	0.11851	0.171831	0.204408		0.105993	0.107638	0.103901	0.100616		0.110763	0.102382	0.133662	0.159901				0.110645	0.13185
463		0.106326	0.116343	0.164617	0.20196		0.111944	0.105616	0.10584	0.106577		0.110749	0.107468	0.130122	0.162495				0.108113	0.129475
464		0.108214	0.118518	0.162367	0.201814		0.109623	0.103812	0.104622	0.104042		0.103931	0.107109	0.132715	0.163529				0.115324	0.130887
465		0.111	0.125626	0.171372	0.20883		0.107527	0.108282	0.101891	0.107834		0.10884	0.109094	0.135675	0.163359				0.110181	0.133466
466		0.111015	0.117122	0.168255	0.198116		0.104732	0.109396	0.110434	0.105457		0.109013	0.105037	0.126202	0.160725				0.10752	0.131657
467		0.113902	0.115932	0.167575	0.197518		0.110125	0.10646	0.102179	0.110314		0.101264	0.108474	0.136099	0.164112				0.110718	0.132601
468		0.110509	0.117421	0.165509	0.20143		0.111341	0.0993465	0.11001	0.106769		0.108447	0.104532	0.127505	0.161963				0.110778	0.132095
469		0.108189	0.117174	0.164114	0.201059		0.104987	0.106209	0.101219	0.111327		0.107926	0.105486	0.129702	0.170673				0.111482	0.130488
470		0.111766	0.123035	0.165244	0.200293		0.107644	0.108842	0.113042	0.107069		0.105411	0.112875	0.132774	0.164872				0.107861	0.134682
471		0.112857	0.111847	0.162264	0.197087		0.108639	0.113708	0.105909	0.109711		0.102797	0.115019	0.132537	0.160566				0.109335	0.127626
472		0.109606	0.119312	0.163997	0.194306		0.108736	0.108723	0.106555	0.11284		0.108965	0.107859	0.134914	0.160069				0.116704	0.126985
473		0.102024	0.121309	0.169876	0.198428		0.106558	0.113455	0.108228	0.10782		0.0974607	0.106776	0.123259	0.160948				0.108893	0.129192
474		0.109595	0.114435	0.170438	0.200574		0.106098	0.105281	0.109334	0.104259		0.106016	0.106969	0.13034	0.160111				0.10995	0.133953
475		0.106968	0.116632	0.166293	0.203234		0.109022	0.103699	0.109487	0.109259		0.105631	0.1044	0.138345	0.159946				0.111804	0.130596
476		0.106219	0.114868	0.160631	0.204236		0.106606	0.102034	0.104651	0.110097		0.106416	0.104928	0.130118	0.165065				0.108456	0.126155
477		0.109444	0.119104	0.160999	0.200233		0.109688	0.109535	0.105841	0.101985		0.105445	0.110844	0.125653	0.165929				0.111941	0.134984
478		0.106884	0.117748	0.158701	0.193971		0.107621	0.111241	0.103548	0.100117		0.107354	0.100781	0.131505	0.163554				0.11265	0.133312
479		0.114017	0.115731	0.162356	0.201734		0.109959	0.107573	0.104139	0.105444		0.105565	0.106634	0.13308	0.168933				0.113799	0.133657
480		0.103214	0.121881	0.167572	0.199918		0.110085	0.117521	0.100108	0.112803		0.0988731	0.109716	0.121319	0.159856				0.108756	0.132476
481		0.108998	0.117861	0.161875	0.194359		0.103968	0.109163	0.10503	0.102945		0.107935	0.111418	0.130709	0.157887				0.106269	0.131602
482		0.106054	0.120521	0.160762	0.202668		0.113352	0.108447	0.102379	0.100814		0.101173	0.106541	0.128404	0.161865				0.10907	0.132308
483		0.103955	0.117345	0.161262	0.195821		0.103956	0.109452	0.107412	0.103443		0.112346	0.108708	0.129018	0.163546				0.109805	0.126501
484		0.115303	0.112694	0.166904	0.193806		0.107206	0.105756	0.100137	0.106608		0.105712	0.109284	0.125365	0.156679				0.106581	0.130514
485		0.102433	0.12081	0.160239	0.200829		0.108321	0.108107	0.107557	0.104019		0.106587	0.10872	0.12505	0.158688				0.106233	0.13221
486		0.111025	0.118956	0.162708	0.198997		0.112766	0.116787	0.104292	0.103281		0.106213	0.102975	0.124273	0.165591				0.109346	0.129038
487		0.110823	0.117771	0.163433	0.200442		0.11058	0.110026	0.105481	0.105501		0.109502	0.109017	0.12151	0.160253				0.112094	0.127572
488		0.109159	0.120712	0.169573	0.196445		0.107116	0.104221	0.102523	0.103944		0.102851	0.106189	0.131017	0.168448				0.103501	0.126472
489		0.110611	0.116164	0.163233	0.195509		0.114335	0.110306	0.105604	0.108628		0.107054	0.110596	0.128108	0.160114				0.109936	0.131092
490		0.106872	0.11761	0.163229	0.198282		0.109665	0.109925	0.1053			0.107892	0.105589	0.130296	0.160798				0.103144	0.12302
491		0.10547	0.120335	0.160389	0.195923		0.114184	0.105764	0.113864			0.107453	0.110036	0.127158	0.162187				0.105048	0.133552
492		0.108296	0.116557	0.155861	0.200919		0.106789	0.110947	0.105115			0.102435	0.107359	0.130006	0.158707				0.108951	0.122286
493		0.104689	0.120295	0.16335	0.201509		0.113792	0.111329	0.107553			0.103662	0.108558	0.129745	0.159848				0.109661	0.131434
494		0.105445	0.118132	0.162552	0.198394		0.104407	0.105844	0.112326			0.107147	0.107288	0.128892	0.157101				0.114443	0.119734
495		0.110074	0.116637	0.165874	0.205384		0.105723	0.112526	0.1023			0.101333	0.104116	0.130747	0.154002				0.107346	0.126068
496		0.110586	0.114186	0.155038	0.1919		0.105802	0.0990219	0.100775			0.109273	0.103977	0.131264	0.161033				0.110813	0.128607
497		0.108026	0.112665	0.162605	0.194558		0.104887	0.108382	0.105427			0.104567	0.106322	0.124242	0.160432				0.107895	0.131087
498		0.107685	0.116594	0.1623	0.195103		0.106139	0.109405	0.110676			0.10988	0.108002	0.126503	0.158571				0.109845	0.124256
499		0.105217	0.120078	0.160397	0.198937		0.1106	0.103682	0.11131			0.105579	0.109433	0.127341	0.155699				0.106559	0.129541
500		0.103393	0.120258	0.159579	0.200506		0.106608	0.104786	0.106832			0.108712	0.108098	0.128109	0.158573				0.106693	0.130737
501		0.106066	0.11809	0.160531	0.205963		0.104868	0.111185	0.105567			0.106844	0.101102	0.125613	0.15621				0.112277	0.131727
502		0.106606	0.112266	0.161454	0.196863		0.113359	0.11109	0.106224			0.105498	0.107391	0.128605	0.154964				0.107821	0.127448
503		0.107294	0.114856	0.164897	0.192429		0.101431	0.112549	0.106323			0.109749	0.104878	0.130402	0.157323				0.104315	0.126188
504		0.10752	0.115365	0.166058	0.19224		0.111459	0.0996092	0.106931			0.110936	0.107004	0.124265	0.161678				0.105393	0.129328
505		0.10629	0.116302	0.162414	0.198208		0.111746	0.10062	0.106074			0.105473	0.101026	0.126777	0.156888				0.102906	0.116416
506		0.107517	0.128743	0.158561	0.200073		0.110564	0.106484	0.104539			0.107115	0.111481	0.122271	0.155542				0.111111	0.130904
507		0.104747	0.116948	0.156072	0.193925		0.104855	0.106108	0.107067			0.104737	0.10076	0.121774	0.161097				0.106499	0.124754
508		0.108196	0.109174	0.163836	0.19669		0.103969	0.106377	0.101474			0.10351	0.104626	0.122944	0.165817				0.110056	0.124897
509		0.109927	0.118605	0.166154	0.193507		0.102401	0.106222	0.106946			0.106521	0.104316	0.134555	0.157922				0.104077	0.124995
510		0.109768	0.112874	0.161607	0.200218		0.113656	0.105515	0.100828			0.10292	0.108042	0.120144	0.15945				0.111723	0.122204
511		0.107267	0.108427	0.15608	0.188352		0.10874	0.107153	0.104733			0.109543	0.103396	0.124049	0.161377				0.110559	0.129996
512		0.107306	0.111489	0.154423	0.197398		0.105761	0.110723	0.103735			0.107093	0.101929	0.123626	0.162075				0.110968	0.127816
513		0.106055	0.116747	0.159477	0.195501		0.106354	0.108679	0.109752			0.1062	0.106821	0.124254	0.156348				0.109435	0.122591
514		0.108061	0.120671	0.159816	0.199505		0.105561	0.108146	0.110167			0.111248	0.10854	0.129368	0.157447				0.112088	0.120298
515		0.105984	0.114719	0.161383	0.189404		0.107298	0.103034	0.107973			0.10774	0.107207	0.123242	0.157977				0.112119	0.121537
516		0.107316	0.117535	0.167534	0.192174		0.105939	0.111083	0.10605			0.108222	0.110615	0.121089	0.160932				0.101066	0.126206
517		0.107538	0.113942	0.161757	0.189168		0.103732	0.10493	0.104294			0.10893	0.107275	0.12607	0.154307				0.106701	0.121858
518		0.100762	0.112889	0.156979	0.19496		0.107165	0.10167				0.104179	0.106668	0.12847	0.15319				0.108037	0.122061
519		0.104037	0.115005	0.156869	0.196182		0.103546	0.105483				0.101359	0.106299	0.121334	0.160936				0.111074	0.128378
520		0.113484	0.119291	0.156768	0.201978		0.109676	0.10694				0.10465	0.107104	0.123015	0.157823				0.109771	0.127708
521		0.102112	0.108418	0.155542	0.191907		0.101539	0.111936				0.104785	0.104432	0.123013	0.156442				0.103536	0.123274
522		0.104198	0.116209	0.157705	0.194756		0.103714	0.10811				0.103389	0.108351	0.126295	0.152753				0.10966	0.12095
523		0.107247	0.108407	0.158476	0.189825		0.102385	0.103007				0.109401	0.110103	0.124179	0.155505				0.112142	0.124608
524		0.101609	0.112879	0.156419	0.195937		0.110844	0.104503				0.104225	0.107296	0.120431	0.157108				0.105264	0.124863
525		0.105345	0.113375	0.161077	0.193407		0.109442	0.105904				0.10004	0.107621	0.125376	0.152909				0.105132	0.1271
526		0.10733	0.114984	0.157095	0.196192		0.105418	0.102983				0.104758	0.105847	0.121185	0.151955				0.112552	0.12844
527		0.110059	0.109806	0.154215	0.189173		0.106156	0.104304				0.105938	0.10644	0.125045	0.158002				0.106316	0.125987
528		0.111512	0.108455	0.160379	0.18971		0.108625	0.117438				0.108335	0.105211	0.128258	0.1546				0.104887	0.128408
529		0.107352	0.116609	0.153051	0.199347		0.106743	0.10923				0.101051	0.106989	0.125432	0.151617				0.109675	0.12129
530		0.104586	0.111241	0.159879	0.194923		0.107031	0.107765				0.104472	0.108611	0.134696	0.154555				0.107545	0.124001
531		0.109903	0.113847	0.165487	0.193424		0.109454	0.106875				0.104349	0.106201	0.124812	0.156155				0.105031	0.121817
532		0.108241	0.11427	0.158915	0.201365		0.105381	0.100822				0.104234	0.110525	0.122959	0.161035				0.100324	0.122715
533		0.105618	0.11528	0.158175	0.195016		0.109335	0.106589				0.104793	0.106309	0.120876	0.150915				0.108081	0.124284
534		0.103472	0.112305	0.151201	0.186238		0.10843	0.106825				0.105559	0.106726	0.119687	0.153381				0.10682	0.124378
535		0.103477	0.11367	0.158257	0.198339		0.105319	0.111323				0.106936	0.100751	0.119728	0.149765				0.106635	0.128321
536		0.105351	0.119027	0.15672	0.189778		0.107324	0.107714				0.110242	0.111023	0.125131	0.144886				0.106087	0.12092
537		0.107055	0.113922	0.156369	0.189357		0.111845	0.103058				0.105735	0.106168	0.127601	0.156271				0.10217	0.120323
538		0.108261	0.10755	0.162628	0.185967		0.114669	0.112864				0.102128	0.106076	0.128619	0.152029				0.105795	0.124569
539		0.103658	0.11068	0.156748	0.191094		0.107604	0.105996				0.105417	0.108603	0.127321	0.157289				0.104127	0.12603
540		0.102357	0.116534	0.160366	0.194803		0.0982375	0.111387				0.109647	0.108652	0.121887	0.15206				0.107343	0.118934
541		0.104273	0.114029	0.162876	0.192088		0.103551	0.10248				0.103309	0.105734	0.124909	0.152834				0.110506	0.118773
542		0.10481	0.112833	0.155237	0.199179		0.104794	0.10673				0.107861	0.110018	0.12249	0.151849				0.103698	0.125665
543		0.100292	0.114531	0.150532	0.193067		0.111096	0.101402				0.103997	0.103617	0.120182	0.158226				0.115059	0.124174
544		0.107114	0.109607	0.156795	0.194159		0.109745	0.104812				0.106241	0.106739	0.13009	0.145872				0.11284	0.126966
545		0.108971	0.113637	0.154146	0.189806		0.112131	0.107129				0.109667	0.100633	0.123257	0.146322				0.110083	0.128172
546		0.103083	0.113683	0.153556	0.187661		0.105385	0.113986				0.104985	0.106161	0.128486	0.151962				0.106531	0.119724
547		0.104797	0.110547	0.158095	0.192673		0.106278	0.106028				0.106897	0.101653	0.11654	0.152082				0.104494	0.123082
548		0.110162	0.11444	0.156528	0.190369		0.107598	0.109328				0.105587	0.108061	0.124537	0.147962				0.10938	0.116278
549		0.107529	0.112873	0.156262	0.189826		0.103123	0.107452				0.108003	0.107573	0.116666	0.155631				0.107689	0.11997
550		0.105489	0.110283	0.153597	0.189539		0.10488	0.102284				0.108264	0.102776	0.127601	0.147442				0.105412	0.122098
551		0.10761	0.110717	0.152026	0.191318		0.110187	0.103757				0.102866	0.108309	0.119733	0.154638				0.105617	0.12456
552		0.105155	0.108312	0.152711	0.188443		0.107253	0.10562				0.108007	0.106025	0.120237	0.151601				0.103282	0.121031
553		0.105628	0.112988	0.154624	0.187568		0.106923	0.107356				0.105881	0.103971	0.120517	0.153234				0.10785	0.115043
554		0.106808	0.113002	0.15047	0.189779		0.111351	0.108432				0.107588	0.109596	0.12177	0.154815				0.108092	0.117761
555		0.0964971	0.115302	0.149776	0.196907		0.102973	0.10517				0.104898	0.0999204	0.122475	0.1549				0.104422	0.123606
556		0.107924	0.11301	0.155791	0.180962		0.105153	0.103922				0.106082	0.102562	0.120219	0.145837				0.10369	0.123138
557		0.108429	0.112696	0.153046	0.188813		0.102831	0.109182				0.101859		0.120962	0.15322				0.100656	0.121258
558		0.10714	0.109984	0.148353	0.194045		0.103071	0.107117				0.107099		0.121939	0.151778				0.107346	0.120956
559		0.103723	0.109099	0.158988	0.183399		0.106857	0.103714						0.118934	0.150245				0.106782	0.121702
560		0.107502	0.108476	0.153999	0.189987		0.105105	0.102928						0.116002	0.151265				0.101781	0.120347
561		0.0983833	0.10967	0.155255	0.191096		0.110298	0.107732						0.121559	0.150066				0.106031	0.116678
562		0.111576	0.109503	0.149701	0.196352		0.106695	0.114023						0.122381	0.153283				0.103774	0.11984
563		0.105259	0.115512	0.160546	0.188087		0.108017	0.106494						0.117324	0.151188					0.125092
564		0.11128	0.11119	0.152968	0.187699		0.106727	0.103371						0.116038	0.149594					0.125339
565		0.109116	0.108716	0.150956	0.189096		0.10442	0.0987267						0.123695	0.150979					0.126679
566		0.111774	0.1172	0.147861	0.189426		0.104687	0.109362						0.12403	0.147454					0.120459
567		0.103497	0.109504	0.150847	0.188764		0.103998	0.109148						0.124073	0.147181					0.117225
568		0.104004	0.112827	0.155044	0.18568		0.106338	0.104649						0.119937	0.155834					0.120979
569		0.0975649	0.111826	0.150911	0.19171		0.10568	0.101843						0.115439	0.148842					0.114382
570		0.101616	0.112784	0.147547	0.184798		0.106505	0.102376						0.117107	0.146173					0.120411
571		0.0994739	0.110989	0.146593	0.183689		0.10784	0.104979						0.119375	0.151477					0.133543
572		0.104381	0.109368	0.151694	0.190291		0.110604	0.10763						0.11677	0.155077					0.111471
573		0.106965	0.104883	0.147395	0.183297		0.105907	0.108887						0.111949	0.147888					0.122164
574		0.1032	0.114266	0.151565	0.182971		0.106526	0.108725						0.119354	0.152348					0.119723
575		0.102115	0.113176	0.153113	0.186512		0.108601	0.106747						0.121481	0.149371					0.120117
576		0.109024	0.106872	0.150029	0.190021		0.109204	0.105522						0.114735	0.145855					0.122443
577		0.107503	0.111227	0.153451	0.186219		0.105972	0.108568						0.123068	0.150485					0.125565
578		0.107701	0.112161	0.144846	0.191248		0.101621	0.107296						0.118552	0.145561					0.114793
579		0.103286	0.111911	0.152271	0.193843		0.108322	0.109806						0.115324	0.150851					0.117476
580		0.113085	0.120516	0.146368	0.19412		0.108201	0.101117						0.11588	0.151264					0.120671
581		0.104703	0.110359	0.144889	0.188366		0.104315	0.105476						0.119098	0.147509					0.112934
582		0.107243	0.111672	0.148888	0.190822		0.108793	0.103649						0.123336	0.148745					0.119946
583		0.107577	0.109377	0.155071	0.191431		0.105774	0.104316						0.117727	0.146661					0.119565
584		0.110422	0.112901	0.153641	0.187929		0.103411	0.107871						0.119519	0.147251					0.11576
585		0.108769	0.106324	0.145237	0.185708		0.107217	0.105483						0.116337	0.147458					0.119991
586		0.103894	0.110137	0.147644	0.185229		0.107344	0.10651						0.11831	0.147296					0.11804
587		0.109302	0.113027	0.150431	0.185132		0.106108	0.110435						0.117381	0.140194					0.117798
588		0.109164	0.112104	0.149852	0.18662		0.107084	0.104564						0.115398	0.145787					0.120844
589		0.10986	0.108487	0.149056	0.185536		0.105355	0.104358						0.114323	0.149066					0.118836
590		0.108713	0.107414	0.144719	0.191171		0.10673	0.107693						0.113122	0.143925					0.118337
591		0.105887	0.109976	0.146594	0.217873		0.105298	0.108098						0.121205	0.14113					0.117445
592		0.102586	0.107308	0.147633	0.184778		0.101325	0.110086						0.12436	0.146574					0.115478
593		0.100548	0.114604	0.149288	0.182754		0.107947	0.106627						0.112331	0.154279					0.111835
594		0.0975797	0.109651	0.149598	0.185342		0.110732	0.107265						0.108436	0.150466					0.118281
595		0.114777	0.108844	0.15362	0.183628		0.0949051	0.102919						0.117468	0.13665					0.116049
596		0.100554	0.111042	0.15347	0.186684		0.104619	0.110782						0.116014	0.145417					0.11312
597		0.104692	0.109558	0.150015	0.183834		0.104518	0.108572						0.113419	0.14695					0.114318
598		0.102129	0.109916	0.142886	0.182706		0.110432	0.10384						0.116103	0.156218					0.114867
599		0.106214	0.112434	0.147301	0.185963		0.103394	0.10459						0.119368	0.149105					0.119952
600			0.108987	0.143967	0.188246		0.107704	0.10918						0.125249	0.142156					0.115593
601			0.105725	0.146198	0.185131		0.107858	0.106164						0.119454	0.14467					0.116974
602			0.104588	0.147347	0.188198		0.10403	0.104276						0.114898	0.146452					0.117817
603			0.111664	0.147385	0.182465		0.101755	0.099163						0.1131	0.142659					0.11717
604			0.106337	0.151724	0.185028		0.106998	0.100867						0.116031	0.145294					0.115773
605			0.104106	0.145256	0.186047		0.109832	0.102662						0.114112	0.148619					0.11561
606			0.105877	0.149081	0.183041		0.103527	0.112684						0.121435	0.147151					0.117109
607			0.110021	0.14727	0.191178		0.109217	0.105994						0.11382	0.149356					0.116758
608			0.107869	0.143845	0.180355		0.106743	0.103076						0.116719	0.147245					0.11699
609			0.0966477	0.146418	0.180426		0.107209	0.106968						0.121443	0.145786					0.119079
610			0.110656	0.144729	0.182586		0.106511	0.104831						0.110993	0.140681					0.113013
611			0.108155	0.144724	0.18039		0.111566	0.103976						0.113902	0.144845					0.1222
612			0.119147	0.150585	0.183362		0.107169	0.112333						0.113264	0.147302					0.114927
613			0.10889	0.144959	0.185805		0.11293	0.108911						0.110991	0.142646					0.124207
614			0.104979	0.141814	0.179993		0.107028	0.102206						0.118564	0.14343					0.114392
615			0.101241	0.144874	0.184247		0.101948	0.106954						0.11875	0.140916					0.116312
616			0.10608	0.142596	0.186523		0.1036	0.101023						0.115668	0.143951					0.115728
617			0.112885	0.147781	0.185412		0.106873	0.10187						0.121685	0.145368					0.119902
618			0.108826	0.147452	0.182078		0.105641	0.104919						0.107989	0.137216					0.11274
619			0.104703	0.147873	0.181998		0.107416	0.109304						0.111913	0.143005					0.118484
620			0.11312	0.145024	0.180661		0.112159	0.105999						0.113673	0.144513					0.11024
621			0.107047	0.149947	0.189793		0.10865	0.10546						0.111676	0.141379					0.116167
622			0.104196	0.141927	0.188069		0.104821	0.105654						0.117268	0.144157					0.112673
623			0.108612	0.142796	0.184475		0.105166	0.108541						0.112766	0.141062					0.112204
624			0.100124	0.140569	0.17995		0.104375	0.103843						0.120456	0.145097					0.109715
625			0.107082	0.144599	0.1827		0.106843	0.104999						0.116917	0.137746					0.112977
626			0.108133	0.14441	0.183272		0.10507	0.110003						0.119156	0.138394					0.111996
627			0.10824	0.145993	0.185321		0.108834	0.104683						0.117346	0.144434					0.116397
628			0.107086	0.146226	0.1776		0.101702	0.101409						0.118502	0.138158					0.113115
629			0.112257	0.142649	0.179415		0.102433	0.105194						0.111166	0.142362					0.114848
630			0.107128	0.142841	0.185145		0.106466	0.106351						0.113185	0.139453					0.112647
631			0.108487	0.15325	0.18641		0.107085	0.10463						0.111728	0.140121					0.109467
632			0.10737	0.141802	0.179878		0.10867	0.0985421						0.12071	0.135835					0.118842
633			0.106144	0.142812	0.175599		0.105164	0.107884						0.115028	0.144158					0.114149
634			0.105455	0.148146	0.185612		0.1076	0.113364						0.116329	0.144616					0.115493
635			0.110541	0.147894	0.178198		0.104981	0.100237						0.112461	0.141272					0.112727
636			0.108785	0.13574	0.177902		0.11124	0.105335						0.115637	0.137388					0.113817
637			0.106313	0.146112	0.181777		0.106369	0.100832						0.113219	0.134379					0.117764
638			0.103695	0.142359	0.179141		0.100236	0.109228						0.110443	0.142684					0.114099
639			0.10683	0.13858	0.175788		0.111033	0.106303						0.112222	0.145612					0.116311
640			0.104511	0.147853	0.181564		0.109098	0.105447						0.116363	0.139311					0.11304
641			0.103869	0.140719	0.180507		0.108062	0.100073						0.115944	0.140213					0.113611
642			0.105067	0.14591	0.182746		0.104208	0.109026						0.112409	0.140328					0.114323
643			0.107588	0.142218	0.180137		0.111117	0.103763						0.111968	0.139086					0.115095
644			0.106398	0.139897	0.180811		0.108622	0.102069						0.115509	0.14117					0.109754
645			0.115534	0.142705	0.186156		0.10278	0.102709						0.112443	0.146998					0.115763
646			0.108231	0.139488	0.177098		0.106148	0.105738						0.11272	0.15081					0.110759
647			0.10788	0.147237	0.177392		0.102576	0.10055						0.114753	0.139404					0.114335
648			0.10563	0.140085	0.180752		0.106993	0.102542						0.113987	0.1406					0.115944
649			0.107299	0.140734	0.181361		0.108307	0.106921						0.111557	0.139527					0.116863
650			0.105799	0.145527	0.176621		0.102026	0.102237						0.108261	0.139416					0.108121
651			0.105482	0.13847	0.183962		0.102639	0.100724						0.112927	0.138588					0.117838
652			0.107466	0.140064	0.181803		0.111353	0.107586						0.117506	0.142105					0.109098
653			0.106406	0.137565	0.182539		0.102028	0.106034						0.118256	0.140854					0.116199
654			0.102014	0.139486	0.179579		0.106541	0.104141						0.107862	0.142616					0.117373
655			0.106785	0.133033	0.172341		0.106768	0.105178						0.114507	0.138883					0.107884
656			0.106421	0.143178	0.175092		0.10211	0.103247						0.122295	0.135657					0.109305
657			0.105781	0.14585	0.181784		0.100558	0.107248						0.11259	0.138203					0.115611
658			0.106006	0.137511	0.18087		0.104691	0.106077						0.125075	0.13438					0.110488
659			0.107348	0.139312	0.178454		0.105408	0.105221						0.110028	0.140478					0.113262
660			0.105793	0.135271	0.180369		0.101724	0.104311						0.114778	0.141118					0.112379
661			0.100214	0.145843	0.175658		0.10672	0.108084						0.120378	0.140406					0.11431
662			0.101327	0.13908	0.181182		0.104221	0.106548						0.11496	0.139392					0.11446
663			0.10713	0.139925	0.176144		0.110294	0.100148						0.107866	0.129965					0.116242
664			0.107152	0.137035	0.178396		0.105231	0.103352						0.109697	0.143623					0.11251
665				0.145463	0.174083		0.104425	0.109575						0.111271	0.142794					0.115291
666				0.143292	0.183272		0.10043	0.105037						0.112029	0.133492					0.114716
667				0.144274	0.182979		0.0998056	0.109788						0.110261	0.137883					0.112787
668				0.147555	0.174837		0.100003	0.107472						0.113997	0.130655					0.115883
669				0.144188	0.177847		0.107431	0.104161						0.111742	0.139522					0.108403
670				0.145528	0.182486		0.108933	0.107637						0.116259	0.136585					0.109136
671				0.139528	0.171138		0.109805	0.108429						0.107788	0.137509					0.104317
672				0.139676	0.176712		0.104323	0.105269						0.109285	0.138445					0.1154
673				0.133722	0.169751		0.105627	0.110423						0.114833	0.137953					0.113795
674				0.13336	0.178837		0.114224	0.108477						0.114588	0.137195					0.106147
675				0.142338	0.172848		0.107283	0.104271						0.108812	0.142417					0.113229
676				0.14461	0.174498		0.10934	0.106837						0.115516	0.136731					0.113384
677				0.135581	0.174077		0.107271	0.104712						0.107487	0.137226					0.110445
678				0.134031	0.177905		0.110598	0.106372						0.10469	0.136104					0.112124
679				0.135874	0.17376		0.105962	0.100686						0.112003	0.136225					0.112112
680				0.136479	0.175352		0.106261	0.101346						0.112967	0.135618					0.112325
681				0.140386	0.179168		0.103543	0.10816						0.110931	0.136795					0.110419
682				0.139381	0.175109		0.105562	0.100107						0.105173	0.127301					0.111934
683				0.135943	0.177709		0.109968	0.113931						0.114064	0.137206					0.110754
684				0.139367	0.176674		0.103555	0.102029						0.111306	0.137279					0.111962
685				0.142336	0.170495		0.107863							0.107725	0.133742					0.112828
686				0.140414	0.174575		0.100452							0.106417	0.134516					0.110825
687				0.140283	0.171164		0.107856							0.11152	0.140004					0.112076
688				0.141005	0.175357		0.105629							0.109684	0.1398					0.107762
689				0.137302	0.172939		0.105393							0.11575	0.132137					0.108922
690				0.131551	0.183994		0.10828							0.113819	0.139903					0.111406
691				0.132923	0.174282		0.104873							0.116018	0.13685					0.111798
692				0.137824	0.167394		0.108344							0.109857	0.142428					0.113106
693				0.144027	0.177961		0.0982871							0.114438	0.142778					0.113694
694				0.134659	0.173387		0.104772							0.109819	0.134775					0.110048
695				0.133524	0.174871									0.110833	0.126466					0.112908
696				0.137989	0.17524									0.107895	0.135432					0.116254
697				0.139822	0.171445									0.10707	0.13703					0.10746
698				0.129281	0.170047									0.106409	0.132818					0.104332
699				0.132369	0.171897									0.111309	0.132649					0.107406
700				0.136473	0.172522									0.114847	0.129654					0.110068
701				0.140236	0.169666									0.106245	0.136348					0.11041
702				0.137818	0.179897									0.100821	0.133637					0.11388
703				0.132366	0.173612									0.106104	0.135142					0.108339
704				0.141712	0.172127									0.109754	0.13821					0.111865
705				0.137497	0.176955									0.110493	0.132139					0.111138
706				0.134945	0.174779									0.109208	0.136599					0.105609
707				0.135157	0.171254									0.113115	0.132589					0.10952
708				0.133431	0.169397									0.108419	0.134346					0.10897
709				0.138185	0.17635									0.108829	0.137514					0.107699
710				0.137921	0.169973									0.103259	0.131045					0.107695
711				0.137584	0.170624									0.10787	0.138458					0.112094
712				0.132771	0.168891									0.105778	0.134257					0.108485
713				0.137637	0.169916									0.113577	0.137164					0.111016
714				0.138363	0.171074									0.116598	0.136875					0.109053
715				0.138302	0.170527									0.10597	0.132569					0.110149
716				0.135763	0.167481									0.110858	0.12945					0.108733
717				0.132598	0.181114									0.109904	0.134477					0.113231
718				0.138512	0.166365									0.105393	0.127894					0.11767
719				0.134957	0.174602									0.106264	0.133786					0.106914
720				0.127102	0.177721									0.1071	0.135452					0.109165
721				0.13655	0.175699									0.111346	0.137691					0.11123
722				0.136377	0.170742									0.108388	0.137417					0.104888
723				0.134532	0.172391									0.115601	0.132272					0.112787
724				0.138846	0.175147									0.109413	0.129414					0.120665
725				0.132617	0.170119									0.102568	0.129324					0.111937
726				0.133755	0.172073									0.109874	0.132287					0.105414
727				0.134591	0.167715									0.10994	0.130434					0.1128
728				0.137939	0.165466									0.106776	0.134312					0.112722
729				0.130553	0.172394									0.109252	0.138078					0.109416
730				0.131536	0.174786									0.106281	0.133047					0.11016
731				0.13499	0.164093									0.104582	0.131767					0.104472
732				0.138265	0.172943									0.112672	0.131448					0.109337
733				0.130856	0.171471									0.108631	0.134902					0.107114
734				0.132229	0.174064									0.1102	0.13367					0.103299
735				0.1351	0.168426									0.107862	0.135242					0.108145
736				0.137111	0.172264									0.109779	0.132438					0.107955
737				0.129769	0.175379									0.107247	0.131352					0.112269
738				0.132657	0.169853									0.111796	0.132644					0.113798
739				0.137628	0.170135									0.103914	0.126757					0.103866
740				0.134073	0.171571									0.114457	0.132042					0.104328
741				0.129403	0.168094									0.110492	0.133437					0.106726
742				0.129952	0.173317									0.110512	0.130048					0.111728
743				0.134696	0.167801									0.108638	0.13851					0.11142
744				0.134693	0.168833									0.106886	0.130141					0.110679
745				0.135045	0.175024									0.108888	0.135038					0.110743
746				0.128955	0.170478									0.108693	0.131006					0.106935
747				0.12886	0.167241									0.109611	0.136726					0.108787
748				0.129126	0.164342									0.113268	0.136634					0.112262
749				0.133811	0.165746									0.109222	0.129046					0.106836
750				0.130581	0.174064									0.106046	0.129473					0.10369
751				0.133113	0.171496									0.109156	0.130049					0.104463
752				0.13007	0.167151									0.103358	0.130906					0.107093
753				0.134869	0.172701									0.109021	0.131509					0.103907
754				0.127794	0.170716									0.106493	0.128116					0.104632
755				0.135495	0.167209									0.111263	0.130235					0.108651
756				0.135436	0.16927									0.109858	0.132573					0.105659
757				0.131468	0.163904									0.106425	0.135911					0.107136
758				0.13781	0.172534									0.107438	0.130097					0.109901
759				0.13085	0.164938									0.107115	0.128645					0.106512
760				0.131031	0.165433									0.110248	0.130564					0.10712
761				0.132965	0.166106									0.106921	0.132344					0.107366
762				0.128281	0.163677									0.105332	0.132926					0.102847
763				0.135033	0.169104									0.10628	0.130376					0.104902
764				0.127847	0.171351									0.110757	0.134258					0.110636
765				0.12423	0.171575									0.108407	0.127635					0.104519
766				0.130783	0.169014									0.103339	0.131074					0.106492
767				0.132043	0.172612									0.105275	0.129306					0.102229
768				0.129066	0.165774									0.104043	0.125371					0.106641
769				0.134058	0.163713									0.102934	0.131206					0.105572
770				0.13377	0.161838									0.104386	0.13377					0.107952
771				0.134258	0.166282									0.112264	0.127699					0.106549
772				0.132898	0.171215									0.10226	0.133889					0.108553
773				0.12799	0.168999									0.106428	0.128766					0.111051
774				0.136709	0.168309									0.106785	0.123203					0.10427
775				0.127805	0.165001									0.110822	0.134299					0.102849
776				0.133332	0.166406									0.10897	0.131921					0.109589
777				0.135141	0.172135									0.107682	0.12622					0.105812
778				0.131214	0.163764									0.107977	0.126646					0.108894
779				0.128344	0.161852									0.104069	0.12738					0.105664
780				0.133127	0.168052									0.106735	0.126882					0.109038
781				0.133921	0.166647									0.0989521	0.129469					0.108416
782				0.130034	0.163012									0.10754	0.122065					0.107075
783				0.127631	0.169788									0.111096	0.133231					0.109255
784				0.133716	0.16265									0.108115	0.133603					0.103244
785				0.125407	0.160824									0.106987	0.127929					0.108196
786				0.131487	0.166532									0.108278	0.128853					0.104059
787				0.125037	0.169626									0.106418	0.126178					0.10703
788				0.123491	0.164647									0.105781	0.124932					0.107241
789				0.130004	0.160836									0.106598	0.123276					0.108532
790				0.131099	0.16463									0.1062	0.131709					0.109144
791				0.131954	0.162444									0.107675	0.130318					0.102977
792				0.130839	0.163048									0.102775	0.125089					0.107545
793				0.122134	0.163713									0.108986	0.131818					0.103994
794				0.128457	0.162979									0.111312	0.129012					0.111404
795				0.127524	0.159497									0.104701	0.125218					0.103507
796				0.129807	0.160274									0.10754	0.124813					0.103968
797				0.130612	0.164915									0.108416	0.127278					0.110621
798				0.133877	0.158954									0.106816	0.126711					0.11026
799				0.125081	0.168569									0.105833	0.124605					0.107931
800				0.12973	0.163854									0.10816	0.125108					0.106506
801				0.125061	0.16056									0.109971	0.123132					0.106453
802				0.126261	0.167741									0.103512	0.127627					0.103951
803				0.127612	0.164911									0.104906	0.124936					0.104789
804				0.127637	0.160676									0.101442	0.130849					0.111926
805				0.128482	0.168536									0.108313	0.12755					0.102726
806				0.129928	0.166892									0.107257	0.127542					0.106759
807				0.126971	0.158903									0.108333	0.123248					0.105483
808				0.130221	0.163185									0.107514	0.125451					0.101417
809				0.128633	0.16258									0.100424	0.129956					0.108043
810				0.131451	0.16148									0.1072	0.133004					0.100742
811				0.125001	0.158717									0.109595	0.12801					0.108507
812				0.126124	0.164615									0.109374	0.132023					0.107473
813				0.130445	0.161272									0.105621	0.122642					0.112252
814				0.125237	0.166775									0.107565	0.128868					0.102809
815				0.125417	0.155844									0.108494	0.122995					0.104768
816				0.126373	0.162832									0.106951	0.130545					0.1092
817				0.124647	0.165212									0.0996329	0.125255					0.1051
818				0.126168	0.161876									0.104929	0.123314					0.10566
819				0.132115	0.160331									0.103491	0.126284					0.106821
820				0.128355	0.166803									0.106182	0.127575					0.107151
821				0.126503	0.163335									0.105475	0.123296					0.106529
822				0.124401	0.162603									0.107864	0.125995					0.106051
823				0.127891	0.161444										0.127009					0.109759
824				0.126463	0.155694										0.130785
825				0.12635	0.165762										0.126306
826				0.125379	0.166649										0.126849
827				0.123343	0.160085										0.132187
828				0.134844	0.164157										0.1311
829				0.122487	0.166565										0.125084
830				0.129681	0.166267										0.120841
831				0.126009	0.162818										0.123776
832				0.132413	0.166549										0.129255
833				0.125414	0.161025										0.12903
834				0.122139	0.165292										0.122759
835				0.121729	0.156014										0.122435
836				0.122134	0.162643										0.125359
837				0.1278	0.161581										0.122859
838				0.126492	0.158684										0.137677
839				0.12391	0.160018										0.134991
840				0.126023	0.156149										0.12776
841				0.122748	0.157653										0.123521
842				0.132691	0.151132										0.126577
843				0.121538	0.166695										0.126025
844				0.122176	0.158235										0.121356
845				0.123798	0.163917										0.122143
846				0.123642	0.161137										0.128698
847				0.125736	0.158572										0.123688
848				0.120167	0.161901										0.121648
849				0.123817	0.167919										0.123138
850				0.126342	0.162279										0.128171
851				0.121847	0.159202										0.129581
852				0.125622	0.156148										0.125907
853				0.125043	0.166099										0.122691
854				0.127794	0.160477										0.128919
855				0.124416	0.160058										0.117809
856				0.122067	0.160296										0.12355
857				0.12506	0.162583										0.120268
858				0.129978	0.155435										0.123659
859				0.12472	0.154645										0.123718
860				0.119862	0.15476										0.121848
861				0.122492	0.158638										0.121797
862				0.125211	0.161262										0.126445
863				0.122211	0.159269										0.120663
864				0.118535	0.160265										0.129115
865				0.122468	0.156923										0.122031
866				0.124795	0.156965										0.124083
867				0.122328	0.156413										0.126343
868				0.12781	0.16138										0.121406
869				0.121879	0.15504										0.125232
870				0.124253	0.157613										0.118049
871				0.123295	0.16041										0.12406
872				0.12041	0.156031										0.124336
873				0.117667	0.159386										0.125848
874				0.121942	0.157211										0.126213
875				0.12238	0.16194										0.115901
876				0.119375	0.151653										0.122738
877				0.131001	0.157696										0.123441
878				0.124778	0.155942										0.120055
879				0.124685	0.156924										0.118215
880				0.120453	0.159693										0.115828
881				0.125531	0.160782										0.119848
882				0.122752	0.15481										0.117691
883				0.118737	0.158142										0.121827
884				0.128655	0.158684										0.12092
885				0.126114	0.157305										0.122653
886				0.122869	0.159976										0.125556
887				0.115975	0.159932										0.119047
888				0.130566	0.162404										0.124113
889				0.125325	0.151871										0.119377
890				0.119136	0.154498										0.123687
891				0.121476	0.152178										0.11983
892				0.121858	0.151257										0.119371
893				0.116042	0.157253										0.117018
894				0.126162	0.150712										0.119981
895				0.123165	0.158576										0.122434
896				0.131556	0.151956										0.118726
897				0.118768	0.158493										0.118922
898				0.121407	0.160426										0.119231
899				0.121343	0.159235										0.121284
900				0.120009	0.158025										0.115212
901				0.121606	0.157724										0.116667
902				0.116653	0.157392										0.122624
903				0.12336	0.154381										0.123107
904				0.119691	0.158628										0.116606
905				0.127992	0.15146										0.122829
906				0.12539	0.152365										0.123396
907				0.119535	0.156874										0.123087
908				0.125741	0.155201										0.120583
909				0.120996	0.157666										0.119343
910				0.119604	0.158609										0.115063
911				0.125279	0.156066										0.116936
912				0.12038	0.15698										0.120137
913				0.121785	0.151088										0.118735
914				0.125337	0.15671										0.118297
915				0.126519	0.154196										0.125659
916				0.119124	0.153889										0.119288
917				0.119929	0.159191										0.11845
918				0.118154	0.154468										0.11851
919				0.125015	0.155818										0.124413
920				0.116845	0.154061										0.115054
921				0.116684	0.15537										0.120208
922				0.125333	0.153507										0.120651
923				0.117765	0.154457										0.119107
924				0.123739	0.155334										0.119828
925				0.114664	0.153148										0.121014
926				0.123818	0.157353										0.122672
927				0.124259	0.155428										0.114526
928				0.121807	0.152304										0.11885
929				0.119525	0.153806										0.117702
930				0.120248	0.15937										0.123421
931				0.120838	0.156839										0.116357
932				0.119345	0.150936										0.119546
933				0.119613	0.149054										0.118078
934				0.11379	0.154596										0.119049
935				0.124608	0.147938										0.118869
936				0.122245	0.148915										0.123285
937				0.118692	0.159789										0.119066
938				0.118209	0.15477										0.120174
939				0.126355	0.153412										0.121104
940				0.12057	0.155279										0.122177
941				0.120556	0.154235										0.120574
942				0.118032	0.151478										0.11877
943				0.117057	0.155607										0.114369
944				0.119409	0.147476										0.120973
945				0.119985	0.154333										0.120571
946				0.112531	0.160982										0.119132
947				0.115526	0.157219										0.120135
948				0.114688	0.151949										0.121959
949				0.123356	0.159393										0.120529
950				0.116728	0.150679										0.113896
951				0.118039	0.149996										0.117402
952				0.117053	0.147999										0.118633
953				0.122192	0.155524										0.114222
954				0.124211	0.156171										0.119025
955				0.121073	0.156297										0.121919
956				0.12325	0.149529										0.115381
957				0.118731	0.145606										0.113732
958				0.11398	0.148595										0.112544
959				0.121673	0.149573										0.118073
960				0.121041	0.15419										0.117385
961				0.121059	0.150333										0.117059
962				0.115513	0.151143										0.115555
963				0.115934	0.147785										0.119045
964				0.115922	0.152728										0.119249
965				0.113312	0.158183										0.114551
966				0.117183	0.147208										0.115106
967				0.119749	0.151084										0.119336
968				0.116565	0.153596										0.113333
969				0.116854	0.154732										0.117501
970				0.123801	0.149745										0.11808
971				0.116448	0.152418										0.115574
972				0.116413	0.160337										0.113078
973				0.114211	0.15203										0.112909
974				0.117227	0.152098										0.115641
975				0.117537	0.155355										0.113375
976				0.123324	0.145835										0.119652
977				0.122294	0.151079										0.11466
978				0.120434	0.153262										0.1151
979				0.120262	0.149897										0.115597
980				0.113274	0.153222										0.120866
981				0.123053	0.152949										0.114053
982				0.112945	0.151475										0.115729
983				0.119773	0.148721										0.114837
984				0.110841	0.156551										0.1154
985				0.120719	0.149007										0.116732
986				0.116601	0.147541										0.116821
987				0.117565	0.153571										0.115299
988				0.119076	0.154855										0.115767
989				0.11796	0.155145										0.114156
990				0.116892	0.150272										0.116046
991				0.11875	0.148742										0.118694
992				0.115411	0.147594										0.11477
993				0.114571	0.157236										0.119435
994				0.12125	0.146835										0.107594
995				0.114574	0.146592										0.117957
996				0.111736	0.1456										0.115585
997				0.118369	0.146068										0.113655
998				0.11714	0.149843										0.118179
999				0.113982	0.14594										0.115581
1000				0.114773	0.149654										0.114706
1001				0.113447	0.147307										0.116885
1002				0.119849	0.149432										0.115838
1003				0.122346	0.146788										0.110365
1004				0.114949	0.146911										0.119289
1005				0.118544	0.152362										0.11155
1006				0.117487	0.146983										0.112067
1007				0.123122	0.148932										0.117087
1008				0.119208	0.152411										0.119196
1009				0.111163	0.140173										0.109782
1010				0.113528	0.14759										0.114252
1011				0.112344	0.152827										0.112723
1012				0.11492	0.148608										0.115159
1013				0.113478	0.148539										0.111988
1014				0.117916	0.146466										0.117327
1015				0.116231	0.150702										0.118292
1016				0.114893	0.15123										0.111751
1017				0.112045	0.148187										0.117621
1018				0.116496	0.147966										0.118104
1019				0.111148	0.14604										0.11965
1020				0.113009	0.148116										0.111613
1021				0.112715	0.143848										0.115987
1022				0.120787	0.149096										0.116257
1023				0.116251	0.151051										0.116999
1024				0.114572	0.142868										0.112216
1025				0.109946	0.145598										0.112236
1026				0.113017	0.142707										0.115369
1027				0.109984	0.143664										0.124547
1028				0.132772	0.140428										0.117576
1029				0.116592	0.14612										0.11272
1030				0.113328	0.151326										0.113228
1031				0.113186	0.146781										0.117073
1032				0.113906	0.146938										0.116013
1033				0.11804	0.148556										0.119567
1034				0.117751	0.145416										0.115987
1035				0.119771	0.146593										0.120079
1036				0.115523	0.14407										0.113716
1037				0.114251	0.151102										0.115822
1038				0.115679	0.147172										0.113386
1039				0.110041	0.144169										0.118552
1040				0.119679	0.145708										0.116979
1041				0.111331	0.146803										0.116934
1042				0.107958	0.145435										0.116848
1043				0.114543	0.149954										0.114511
1044				0.108701	0.151114										0.116732
1045				0.11423	0.149153										0.111076
1046				0.11533	0.150239										0.115242
1047				0.113515	0.144172										0.122348
1048				0.109426	0.14414										0.109318
1049				0.116048	0.145753										0.113729
1050				0.117449	0.148939										0.119241
1051				0.109445	0.142575										0.115975
1052				0.117509	0.151109										0.114412
1053				0.117767	0.146238										0.111992
1054				0.114588	0.152063										0.11771
1055				0.116055	0.149584										0.115416
1056				0.114974	0.145903										0.113165
1057				0.110993	0.141352										0.114985
1058				0.111534	0.150116										0.112574
1059				0.10794	0.148943										0.112309
1060				0.1127	0.146358										0.112239
1061				0.111035	0.144425										0.113617
1062				0.113412	0.149053										0.113977
1063				0.112526	0.142166										0.116425
1064				0.108772	0.140112										0.11375
1065				0.115879	0.146659										0.112572
1066				0.114093	0.145745										0.109519
1067				0.112238	0.143834										0.111398
1068				0.116613	0.147116										0.114267
1069				0.11377	0.142025										0.115463
1070				0.116607	0.143376										0.119398
1071				0.115127	0.146304										0.114536
1072				0.109654	0.14698										0.113148
1073				0.112392	0.146023										0.107345
1074				0.110379	0.141478										0.109595
1075				0.114841	0.147588										0.109693
1076				0.113907	0.149206										0.118795
1077				0.108378	0.145989										0.114278
1078				0.111724	0.145003										0.108823
1079				0.11409	0.144272										0.108769
1080				0.115871	0.144769										0.111973
1081				0.116731	0.147639										0.114893
1082				0.114049	0.147774										0.112992
1083				0.111699	0.143339										0.111667
1084				0.114753	0.141215										0.1092
1085				0.114652	0.141642										0.115205
1086				0.115335	0.141559										0.115537
1087				0.111873	0.142909										0.118217
1088				0.108142	0.144542										0.110012
1089				0.115004	0.13962										0.111651
1090				0.113539	0.139149										0.113744
1091				0.116359	0.146208										0.120416
1092				0.116235	0.144597										0.115428
1093				0.108496	0.14473										0.113093
1094				0.115586	0.147385										0.112229
1095				0.111375	0.145799										0.110691
1096				0.11132	0.145741										0.114756
1097				0.107987	0.141141										0.118766
1098				0.113006	0.142105										0.113
1099				0.116022	0.149866										0.108612
1100				0.110833	0.140844										0.116111
1101				0.112499	0.143184										0.116278
1102				0.110629	0.143214										0.115542
1103				0.104792	0.147767										0.110012
1104				0.112298	0.138398										0.109472
1105				0.109751	0.141661										0.109956
1106				0.114868	0.146458										0.104781
1107				0.11326	0.141802										0.111231
1108				0.109757	0.143202										0.106721
1109				0.113885	0.141274										0.110976
1110				0.111168	0.146425										0.10813
1111				0.108962	0.134219										0.111056
1112				0.114156	0.145068										0.11281
1113				0.112579	0.145147										0.112318
1114				0.11391	0.137994										0.1143
1115				0.10988	0.145915										0.114437
1116				0.115745	0.136531										0.109447
1117				0.106916	0.136791										0.109031
1118				0.107857	0.141688										0.106999
1119				0.113042	0.131195										0.111549
1120				0.112767	0.143473										0.111046
1121				0.104899	0.136911										0.111555
1122				0.112295	0.145864										0.10808
1123				0.115763	0.139359										0.109532
1124				0.114114	0.146545										0.109318
1125				0.111468	0.139726										0.11518
1126				0.114843	0.138439										0.108546
1127				0.112273	0.144264										0.112924
1128				0.108472	0.140985										0.112263
1129				0.107515	0.138945										0.111461
1130				0.115918	0.141682										0.106428
1131				0.111808	0.138528										0.109633
1132				0.111906	0.138279										0.110034
1133				0.110864	0.146695										0.107453
1134				0.107971	0.137533										0.105743
1135				0.113092	0.144355										0.108538
1136				0.107011	0.140146										0.107588
1137				0.110398	0.138895										0.109051
1138				0.110586	0.142836										0.104057
1139				0.108776	0.139416										0.11759
1140				0.108615	0.144842										0.106939
1141				0.115152	0.14164										0.11313
1142				0.10923	0.142667										0.108805
1143				0.110347	0.144097										0.110551
1144				0.108363	0.137525										0.117906
1145				0.10474	0.140433										0.108463
1146				0.106962	0.136803										0.110934
1147				0.112892	0.139665										0.108758
1148				0.110827	0.138269										0.108572
1149				0.106595	0.136883										0.11709
1150				0.110196	0.140145										0.106673
1151				0.112712	0.143211										0.112629
1152				0.113351	0.133335										0.108656
1153				0.112937	0.140479										0.108702
1154				0.112235	0.13223										0.109446
1155				0.107368	0.140399										0.103501
1156				0.11172	0.140068										0.115714
1157				0.108381	0.13634										0.112973
1158				0.108729	0.135927										0.110516
1159				0.108666	0.136238										0.106266
1160				0.111852	0.138991										0.106492
1161				0.105422	0.143843										0.106308
1162				0.109418	0.14449										0.108311
1163				0.105213	0.136133										0.107337
1164				0.109579	0.140364										0.11261
1165				0.113785	0.140241										0.113814
1166				0.107811	0.134856										0.105409
1167				0.111864	0.141345										0.109518
1168				0.109582	0.139493										0.111913
1169				0.109853	0.136632										0.112069
1170				0.112019	0.145389										0.114477
1171				0.108967	0.137913										0.10917
1172				0.103249	0.134003										0.104401
1173				0.108771	0.133325										0.118149
1174				0.106997	0.135915										0.110319
1175				0.107868	0.140836										0.114717
1176				0.105971	0.135541										0.108671
1177				0.108593	0.140159										0.106759
1178				0.110078	0.140635										0.111966
1179				0.106792	0.143964										0.110177
1180				0.105689	0.14611										0.107551
1181				0.107717	0.138037										0.11222
1182				0.105459	0.134692										0.114064
1183				0.113183	0.142242										0.108471
1184				0.114121	0.141527										0.10369
1185				0.109571	0.134397										0.106642
1186				0.103993	0.137407										0.10285
1187				0.110968	0.136175										0.108887
1188				0.107127	0.141263										0.105192
1189				0.106878	0.135739										0.107406
1190				0.107165	0.136809										0.10946
1191				0.108899	0.138233										0.106617
1192				0.106402	0.139516										0.102722
1193				0.112018	0.137924										0.106475
1194				0.107712	0.129016										0.109674
1195				0.106485	0.135693										0.109152
1196				0.111872	0.130688										0.110772
1197				0.109473	0.134544										0.113407
1198				0.110523	0.135783										0.109638
1199				0.109004	0.13921										0.112479
1200				0.110329	0.137552										0.105459
1201				0.114737	0.133512										0.113942
1202				0.106675	0.140475										0.107898
1203				0.106815	0.137619										0.104857
1204				0.108545	0.139419										0.106073
1205				0.105171	0.139675										0.112121
1206				0.113466	0.141268										0.112165
1207				0.107896	0.131093										0.10958
1208				0.108474	0.144475										0.105008
1209				0.11065	0.14081										0.108713
1210				0.109352	0.135537										0.108836
1211				0.105135	0.13041										0.114871
1212				0.108571	0.133538										0.108575
1213				0.108069	0.133927										0.105007
1214				0.103608	0.134725										0.101649
1215				0.112005	0.131917										0.111985
1216				0.104257	0.136809										0.10435
1217				0.105606	0.135415										0.113768
1218				0.106911	0.134152										0.103293
1219				0.106659	0.132486										0.104117
1220				0.110887	0.133705										0.10437
1221				0.110228	0.137955										0.112728
1222				0.105045	0.137845										0.10665
1223				0.105999	0.140441										0.108217
1224				0.104449	0.135343										0.110978
1225				0.105092	0.139495										0.110528
1226				0.102254	0.139567										0.0994678
1227				0.106961	0.131224										0.104913
1228				0.105598	0.133694										0.107394
1229				0.111611	0.140182										0.108099
1230				0.103326	0.13913										0.106297
1231				0.107955	0.132643										0.104739
1232				0.107475	0.135526										0.101335
1233				0.101976	0.133889										0.106385
1234				0.109955	0.138518										0.103148
1235				0.105317	0.133742										0.107104
1236				0.108002	0.135194										0.109028
1237				0.10971	0.133161										0.106539
1238				0.107174	0.13652										0.10656
1239				0.105214	0.130319										0.107561
1240				0.112828	0.136266										0.111631
1241				0.10437	0.131146										0.108747
1242				0.106686	0.135522										0.106687
1243				0.104919	0.136992										0.109352
1244				0.108809	0.13483										0.106398
1245				0.110166	0.132269										0.110366
1246				0.103489	0.138374										0.10844
1247				0.103097	0.135852										0.108512
1248				0.109408	0.137673										0.111951
1249				0.106606	0.136621										0.108256
1250				0.110087	0.135963										0.106518
1251				0.1078	0.135584										0.10795
1252				0.115755	0.132056										0.106164
1253				0.104869	0.134863										0.109553
1254				0.112007	0.137789										0.105617
1255				0.108914	0.138474										0.111074
1256				0.102713	0.133548										0.104151
1257				0.105363	0.132241										0.108236
1258				0.109768	0.133325										0.100936
1259				0.111058	0.136885										0.105958
1260				0.101373	0.136435										0.109793
1261				0.108303	0.134816										0.107092
1262				0.107697	0.133908										0.11126
1263				0.108967	0.136529										0.113851
1264				0.114186	0.139055										0.108673
1265				0.104562	0.135437										0.110996
1266				0.0967836	0.130666										0.103982
1267				0.109549	0.135689										0.106245
1268				0.106515	0.129817										0.107383
1269				0.106584	0.130276										0.107028
1270				0.107325	0.135935										0.11061
1271				0.104382	0.135911										0.107077
1272				0.105703	0.132519										0.107078
1273				0.107473	0.1323										0.101542
1274				0.103672	0.135834										0.106764
1275				0.10184	0.130685										0.108966
1276				0.106186	0.135207										0.104577
1277				0.106803	0.136842										0.108567
1278				0.107897	0.134225										0.106182
1279				0.107373	0.134389										0.110636
1280				0.107857	0.137825										0.109355
1281				0.103582	0.134139										0.106682
1282				0.103703	0.131651										0.10586
1283				0.108016	0.139898										0.105818
1284				0.100104	0.134105										0.108201
1285				0.10677	0.133428										0.101557
1286				0.0981409	0.134015										0.112564
1287				0.104926	0.135683										0.104129
1288				0.101706	0.136948										0.103911
1289				0.107922	0.134338										0.101381
1290				0.112014	0.128387										0.108284
1291				0.103137	0.13899										0.108985
1292				0.110272	0.130612										0.108024
1293				0.109943	0.137977										0.106873
1294				0.107668	0.134111										0.104688
1295				0.111341	0.132152										0.111952
1296				0.101975	0.136834										0.101624
1297				0.112042	0.13554										0.11046
1298				0.104601	0.126993										0.109998
1299				0.100371	0.132264										0.113774
1300				0.1027	0.135436										0.103234
1301				0.110032	0.12666										0.103481
1302				0.101748	0.138013										0.109475
1303				0.109161	0.127506										0.105087
1304				0.10512	0.138001										0.110651
1305				0.109863	0.13139										0.107578
1306				0.100297	0.132496										0.104478
1307				0.100973	0.135115										0.108482
1308				0.107328	0.133292										0.111992
1309				0.104607	0.133899										0.108229
1310				0.106692	0.129186										0.106062
1311				0.109854	0.130205										0.110839
1312					0.133094										0.112739
1313					0.134845										0.108226
1314					0.130333										0.105877
1315					0.129624										0.105385
1316					0.131771										0.10836
1317					0.131965										0.109558
1318					0.134988										0.106808
1319					0.135286										0.109089
1320					0.132487										0.111685
1321					0.13791										0.11251
1322					0.133598										0.105361
1323					0.13062										0.105588
1324					0.124913										0.104686
1325					0.128878										0.106547
1326					0.133471										0.103801
1327					0.132725										0.107541
1328					0.131185										0.107786
1329					0.124316										0.105035
1330					0.131143										0.114682
1331					0.125002										0.108988
1332					0.125824										0.109667
1333					0.135358										0.109364
1334					0.134225										0.109468
1335					0.134583										0.105593
1336					0.130933										0.110741
1337					0.135652										0.107781
1338					0.128962										0.10377
1339					0.130047										0.111452
1340					0.134782										0.111055
1341					0.127137										0.105007
1342					0.131159										0.109586
1343					0.128072										0.11235
1344					0.130789										0.105952
1345					0.13163										0.106251
1346					0.127574										0.113899
1347					0.126589										0.102935
1348					0.125046										0.104894
1349					0.1328										0.110197
1350					0.127584										0.108443
1351					0.129568										0.111738
1352					0.131716										0.114771
1353					0.129031										0.105548
1354					0.131561										0.104663
1355					0.129597										0.110827
1356					0.129765										0.103323
1357					0.131356										0.111634
1358					0.129929										0.112342
1359					0.125667										0.1086
1360					0.125274										0.102357
1361					0.12618										0.107507
1362					0.133591										0.105192
1363					0.125223										0.111178
1364					0.130809										0.104196
1365					0.132189										0.108011
1366					0.131183										0.106868
1367					0.12809										0.103894
1368					0.127827										0.104198
1369					0.129824										0.108363
1370					0.132889										0.105682
1371					0.125892										0.106494
1372					0.134379										0.104604
1373					0.131585										0.106259
1374					0.127762										0.110802
1375					0.129903										0.104195
1376					0.131028										0.108557
1377					0.128817										0.107581
1378					0.131062										0.103567
1379					0.125982										0.112005
1380					0.127269										0.109497
1381					0.127994										0.102016
1382					0.12478										0.107229
1383					0.128786										0.107666
1384					0.132432										0.10313
1385					0.130744										0.106425
1386					0.124212										0.108583
1387					0.134077										0.104076
1388					0.132487										0.104263
1389					0.132576										0.108998
1390					0.128416										0.105079
1391					0.127431										0.106639
1392					0.130273										0.120404
1393					0.128214										0.102421
1394					0.125856										0.10881
1395					0.124295										0.102209
1396					0.12459										0.109887
1397					0.132548										0.108052
1398					0.125423										0.107476
1399					0.127137										0.104996
1400					0.124767										0.10888
1401					0.126226										0.100054
1402					0.134951										0.105549
1403					0.124671										0.108371
1404					0.130517										0.105222
1405					0.12414										0.107129
1406					0.125449										0.103324
1407					0.123776										0.106733
1408					0.12729										0.103303
1409					0.131943										0.10433
1410					0.133657										0.101378
1411					0.121462										0.110244
1412					0.128054
1413					0.130034
1414					0.121589
1415					0.131942
1416					0.131662
1417					0.127976
1418					0.127897
1419					0.125321
1420					0.124915
1421					0.132726
1422					0.125301
1423					0.124886
1424					0.127
1425					0.126105
1426					0.122294
1427					0.125947
1428					0.125985
1429					0.128587
1430					0.128104
1431					0.133138
1432					0.128472
1433					0.124891
1434					0.121167
1435					0.125616
1436					0.123937
1437					0.123986
1438					0.132653
1439					0.125258
1440					0.127852
1441					0.126069
1442					0.123101
1443					0.128179
1444					0.1273
1445					0.123237
1446					0.122437
1447					0.12675
1448					0.120626
1449					0.125272
1450					0.123577
1451					0.123762
1452					0.125412
1453					0.126438
1454					0.131685
1455					0.123583
1456					0.12721
1457					0.126494
1458					0.128188
1459					0.126087
1460					0.127861
1461					0.120224
1462					0.120165
1463					0.126642
1464					0.124263
1465					0.124343
1466					0.134106
1467					0.123865
1468					0.12558
1469					0.128905
1470					0.120585
1471					0.131413
1472					0.131331
1473					0.118723
1474					0.118096
1475					0.126914
1476					0.13108
1477					0.121366
1478					0.123286
1479					0.117665
1480					0.127327
1481					0.129012
1482					0.124549
1483					0.129622
1484					0.126804
1485					0.121868
1486					0.119965
1487					0.124167
1488					0.126755
1489					0.123993
1490					0.123234
1491					0.124859
1492					0.118633
1493					0.124363
1494					0.122948
1495					0.123415
1496					0.127767
1497					0.128461
1498					0.130315
1499					0.124892
1500					0.123885
1501					0.127513
1502					0.12108
1503					0.129262
1504					0.125305
1505					0.124527
1506					0.129949
1507					0.122933
1508					0.123029
1509					0.121319
1510					0.119387
1511					0.125902
1512					0.123254
1513					0.121912
1514					0.122862
1515					0.123629
1516					0.123479
1517					0.124607
1518					0.124008
1519					0.123168
1520					0.120655
1521					0.128418
1522					0.123908
1523					0.124004
1524					0.126958
1525					0.125206
1526					0.12452
1527					0.121187
1528					0.122106
1529					0.124595
1530					0.116676
1531					0.122993
1532					0.119003
1533					0.118554
1534					0.122688
1535					0.122603
1536					0.123733
1537					0.114771
1538					0.115347
1539					0.123477
1540					0.125421
1541					0.122747
1542					0.123928
1543					0.129991
1544					0.121865
1545					0.122008
1546					0.119874
1547					0.126802
1548					0.122372
1549					0.122366
1550					0.126445
1551					0.125057
1552					0.123258
1553					0.120883
1554					0.118523
1555					0.122932
1556					0.123824
1557					0.123495
1558					0.123504
1559					0.122413
1560					0.128412
1561					0.12373
1562					0.120866
1563					0.125231
1564					0.118652
1565					0.117443
1566					0.119774
1567					0.114954
1568					0.123332
1569					0.127548
1570					0.12697
1571					0.119364
1572					0.120092
1573					0.118762
1574					0.124974
1575					0.120163
1576					0.11769
1577					0.122059
1578					0.123886
1579					0.123275
1580					0.120336
1581					0.121361
1582					0.119537
1583					0.127327
1584					0.120631
1585					0.120916
1586					0.122564
1587					0.120481
1588					0.116513
1589					0.122609
1590					0.124902
1591					0.117286
1592					0.120187
1593					0.118878
1594					0.11675
1595					0.118323
1596					0.139179
1597					0.116519
1598					0.122625
1599					0.118148
1600					0.126191
1601					0.120586
1602					0.119284
1603					0.12119
1604					0.120125
1605					0.116566
1606					0.125656
1607					0.124533
1608					0.115393
1609					0.119779
1610					0.120229
1611					0.11934
1612					0.11409
1613					0.12267
1614					0.120354
1615					0.113276
1616					0.118453
1617					0.122542
1618					0.122307
1619					0.118717
1620					0.115573
1621					0.120838
1622					0.121008
1623					0.118317
1624					0.121802
1625					0.120123
1626					0.120369
1627					0.122125
1628					0.127216
1629					0.117377
1630					0.115736
1631					0.121932
1632					0.117008
1633					0.117645
1634					0.119883
1635					0.117478
1636					0.122266
1637					0.11994
1638					0.118912
1639					0.111374
1640					0.124431
1641					0.120213
1642					0.116484
1643					0.118068
1644					0.119358
1645					0.124515
1646					0.11536
1647					0.119117
1648					0.115741
1649					0.118965
1650					0.112298
1651					0.121223
1652					0.119481
1653					0.116046
1654					0.114415
1655					0.115837
1656					0.119592
1657					0.120877
1658					0.116246
1659					0.11169
1660					0.118179
1661					0.120232
1662					0.115759
1663					0.119192
1664					0.121207
1665					0.120557
1666					0.115236
1667					0.112856
1668					0.120768
1669					0.12412
1670					0.12162
1671					0.113935
1672					0.118282
1673					0.116384
1674					0.112584
1675					0.12311
1676					0.121017
1677					0.121428
1678					0.114252
1679					0.116689
1680					0.120609
1681					0.119393
1682					0.118527
1683					0.115575
1684					0.119196
1685					0.115997
1686					0.122836
1687					0.116554
1688					0.117866
1689					0.1103
1690					0.120726
1691					0.119866
1692					0.118627
1693					0.115602
1694					0.117651
1695					0.122117
1696					0.120561
1697					0.119695
1698					0.119649
1699					0.116289
1700					0.118296
1701					0.118548
1702					0.114125
1703					0.118716
1704					0.114991
1705					0.117618
1706					0.113093
1707					0.117774
1708					0.12116
1709					0.114938
1710					0.116033
1711					0.122366
1712					0.118918
1713					0.116527
1714					0.113119
1715					0.11615
1716					0.117699
1717					0.121992
1718					0.116918
1719					0.115966
1720					0.115265
1721					0.122388
1722					0.11788
1723					0.113965
1724					0.114853
1725					0.118594
1726					0.117477
1727					0.113021
1728					0.118587
1729					0.119899
1730					0.118893
1731					0.117279
1732					0.116869
1733					0.11317
1734					0.112534
1735					0.115464
1736					0.112796
1737					0.121388
1738					0.116357
1739					0.120065
1740					0.113864
1741					0.119145
1742					0.115662
1743					0.118234
1744					0.115548
1745					0.120685
1746					0.116391
1747					0.117288
1748					0.118478
1749					0.118024
1750					0.11211
1751					0.113499
1752					0.117751
1753					0.122374
1754					0.111739
1755					0.114845
1756					0.117087
1757					0.115222
1758					0.11512
1759					0.11362
1760					0.120556
1761					0.121362
1762					0.123386
1763					0.119752
1764					0.117589
1765					0.117296
1766					0.113783
1767					0.116669
1768					0.115529
1769					0.115912
1770					0.1146
1771					0.114318
1772					0.116686
1773					0.114372
1774					0.124894
1775					0.112737
1776					0.120406
1777					0.115007
1778					0.111501
1779					0.115446
1780					0.113517
1781					0.122362
1782					0.11583
1783					0.113362
1784					0.109878
1785					0.1164
1786					0.116747
1787					0.117982
1788					0.11324
1789					0.119062
1790					0.111369
1791					0.118594
1792					0.112646
1793					0.1158
1794					0.118526
1795					0.108131
1796					0.11361
1797					0.119599
1798					0.109433
1799					0.112791
1800					0.116726
1801					0.112913
1802					0.116875
1803					0.11404
1804					0.114639
1805					0.111424
1806					0.119138
1807					0.118204
1808					0.114991
1809					0.114006
1810					0.116807
1811					0.112322
1812					0.108829
1813					0.114257
1814					0.110386
1815					0.114144
1816					0.111093
1817					0.113613
1818					0.116582
1819					0.114316
1820					0.114215
1821					0.115694
1822					0.117305
1823					0.116095
1824					0.109116
1825					0.114799
1826					0.118704
1827					0.113897
1828					0.117582
1829					0.112536
1830					0.113676
1831					0.110266
1832					0.116184
1833					0.120245
1834					0.11769
1835					0.116063
1836					0.112773
1837					0.118282
1838					0.110818
1839					0.110562
1840					0.11253
1841					0.116257
1842					0.116192
1843					0.113618
1844					0.114283
1845					0.116605
1846					0.117458
1847					0.110956
1848					0.111844
1849					0.115943
1850					0.110645
1851					0.110024
1852					0.114274
1853					0.116671
1854					0.115323
1855					0.117565
1856					0.10848
1857					0.118497
1858					0.11382
1859					0.108208
1860					0.114892
1861					0.110567
1862					0.112994
1863					0.117509
1864					0.113177
1865					0.112448
1866					0.112348
1867					0.114271
1868					0.110182
1869					0.10634
1870					0.115885
1871					0.110214
1872					0.112703
1873					0.112049
1874					0.110995
1875					0.115158
1876					0.118668
1877					0.116966
1878					0.107569
1879					0.114945
1880					0.110027
1881					0.113474
1882					0.116052
1883					0.112351
1884					0.108759
1885					0.113604
1886					0.11239
1887					0.114847
1888					0.115699
1889					0.114773
1890					0.112937
1891					0.113956
1892					0.110724
1893					0.113175
1894					0.108383
1895					0.113586
1896					0.115444
1897					0.10852
1898					0.112727
1899					0.115754
1900					0.114263
1901					0.110081
1902					0.1077
1903					0.113234
1904					0.118624
1905					0.114133
1906					0.115041
1907					0.117565
1908					0.114719
1909					0.112136
1910					0.110382
1911					0.115994
1912					0.112846
1913					0.111403
1914					0.107178
1915					0.107093
1916					0.1092
1917					0.115713
1918					0.115774
1919					0.113043
1920					0.11778
1921					0.11311
1922					0.11526
1923					0.110559
1924					0.113262
1925					0.109994
1926					0.113042
1927					0.110691
1928					0.111092
1929					0.106039
1930					0.113685
1931					0.114567
1932					0.110498
1933					0.118881
1934					0.1143
1935					0.110042
1936					0.109982
1937					0.114069
1938					0.109571
1939					0.112626
1940					0.110052
1941					0.110447
1942					0.11256
1943					0.111331
1944					0.11022
1945					0.116741
1946					0.112004
1947					0.113894
1948					0.11602
1949					0.112389
1950					0.116132
1951					0.102801
1952					0.115759
1953					0.105448
1954					0.113524
1955					0.110424
1956					0.106272
1957					0.106087
1958					0.109746
1959					0.114683
1960					0.107215
1961					0.111328
1962					0.114147
1963					0.108694
1964					0.112362
1965					0.113022
1966					0.113906
1967					0.11156
1968					0.104818
1969					0.109037
1970					0.101933
1971					0.105821
1972					0.108669
1973					0.10458
1974					0.112573
1975					0.111332
1976					0.109635
1977					0.10429
1978					0.111689
1979					0.106605
1980					0.112524
1981					0.110595
1982					0.112937
1983					0.107894
1984					0.10933
1985					0.109473
1986					0.112523
1987					0.114463
1988					0.111611
1989					0.113399
1990					0.108492
1991					0.102728
1992					0.10993
1993					0.111528
1994					0.110257
1995					0.114139
1996					0.113221
1997					0.103034
1998					0.105191
1999					0.114697
2000					0.115066
2001					0.110986
2002					0.113681
[truncated: 345 more rows]

## Sheet: Source_6F
	koff	1	2	3		average	st dev
WT	0	0.011134	0.011404	0.011149		0.011229	0.00015174
	0.025	0.00636	0.0078976	0.009786		0.00801453	0.00171599
	0.05	0.0039176	0.0046217	0.0049464		0.00449523	0.00052593
	0.1	0.0019807	0.0015824	0.0019591		0.00184073	0.000223984
	0.25	0.0010847	0.00080432	0.0011293		0.00100611	0.000176169
7A	0	0.011134	0.011404	0.011149		0.011229	0.00015174
	0.025	0.009424	0.011436	0.011798		0.010886	0.001279
	0.05	0.0095672	0.010422	0.011629		0.0105394	0.0010359
	0.1	0.0094367	0.0099182	0.0099803		0.0097784	0.000297545
	0.25	0.0075012	0.0081422	0.0083067		0.00798337	0.000425592
3A	0	0.011134	0.011404	0.011149		0.011229	0.00015174
	0.025	0.0073779	0.01032	0.011381		0.00969297	0.0020739
	0.05	0.0049017	0.0075689	0.0085233		0.00699797	0.00187709
	0.1	0.0033711	0.0038646	0.0051471		0.0041276	0.000916745
	0.25	0.0024296	0.0018387	0.0028716		0.00237997	0.000518236
4A	0	0.011134	0.011404	0.011149		0.011229	0.00015174
	0.025	0.0087218	0.0090953	0.010135		0.00931737	0.000732304
	0.05	0.0069742	0.0063992	0.0082548		0.0072094	0.000949896
	0.1	0.0048554	0.0034683	0.0051542		0.00449263	0.000899591
	0.25	0.0034344	0.0020984	0.0034281		0.00298697	0.000769528

## Sheet: Source_6G
	–	WT	7A	3A	4A	S5S1C
kcat
Replicate 1	0.2677	0.44618	0.22854	0.4893	0.46418	0.30426
Replicate 2	0.2188	0.46242	0.35242	0.4753	0.47854	0.31082
Replicate 3	0.23626	0.43122	0.341	0.42986	0.42788	0.30244
Average	0.24092	0.446607	0.30732	0.46482	0.456867	0.30584
St dev	0.0247808	0.0156044	0.068464	0.0310749	0.0261098	0.00440777
Fold increase	–	1.85376	1.27561	1.92935	1.89634	1.26947
