# Supplementary material for: Cooperative interactions facilitate stimulation of Rad51 by the Swi5-Sfr1 auxiliary factor complex
Source: eLife. 2020 Mar 24;9:e52566. doi: 10.7554/eLife.52566 (PMC7093153; doi:10.7554/eLife.52566)
Supplement: Figure 7—source data 1. — Survival (%) following UV irradiation for data in Figure 7D. [file elife-52566-fig7-data1.xlsx]

## Sheet: Source_7B
			# of colonies			100% survival			Survival %			Survival % average		SD
Genotype	UV dose (J/m2)	cells plated	-1	-2	-3	-1	-2	-3	-1	-2	-3
WT	0	200	146	92	161	146	92	161	100	100	100	100	sfr1+	0	0
	60	400	131	107	167	292	184	322	44.863	58.1522	51.8634	51.6262		6.64775	60
	120	800	186	136	243	584	368	644	31.8493	36.9565	37.7329	35.5129		3.19643	120
	180	1500	231	200	306	1095	690	1207.5	21.0959	28.9855	25.3416	25.141		3.94863	180
sfr1d	0	200	79	157	138	79	157	138	100	100	100	100	sfr1d	0
	60	400	105	163	119	158	314	276	66.4557	51.9108	43.1159	53.8275		11.7873
	120	4000	286	394	497	1580	3140	2760	18.1013	12.5478	18.0072	16.2188		3.17952
	180	20000	141	140	184	7900	15700	13800	1.78481	0.89172	1.33333	1.33662		0.446554
sfr1-7A	0	200	67	58	110	67	58	110	100	100	100	100	sfr1-7A	0
	60	400	78	68	117	134	116	220	58.209	58.6207	53.1818	56.6705		3.02828
	120	800	50	54	131	268	232	440	18.6567	23.2759	29.7727	23.9018		5.58437
	180	1500	78	90	72	502.5	435	825	15.5224	20.6897	8.72727	14.9798		5.99962

## Sheet: Sourc_7D
			# of colonies			100% survival			Survival %			Survival % average		SD
Genotype	UV dose (J/m2)	cells plated	-1	-2	-3	100% survival	-2	-3	-1	-2	-3
rad55d	0	200	204	221	232	204	221	232	100	100	100	100	rad55d	0	0
	50	500	175	260	199	510	552.5	580	34.3137	47.0588	34.3103	38.561		7.35936	50
	75	1000	148	210	140	1020	1105	1160	14.5098	19.0045	12.069	15.1944		3.5181	75
	100	5000	136	292	221	3060	3315	3480	4.44444	8.80845	6.35057	6.53449		2.18781	100
rad55d sfr1d	0	200	99	108	88	99	108	88	100	100	100	100	rad55d sfr1d	0
	50	1000	57	44	55	495	540	440	11.5152	8.14815	12.5	10.7211		2.282
	75	20000	45	45	69	9900	10800	8800	0.454545	0.416667	0.784091	0.551768		0.202087
	100	40000	6	20	9	19800	21600	17600	0.030303	0.0925926	0.0511364	0.0580107		0.0317087
rad55d sfr1-7A	0	200	532	135	126	532	135	126	100	100	100	100	rad55d sfr1-7A	0
	50	1000	458	89	92	2660	675	630	17.218	13.1852	14.6032	15.0021		2.04582
	75	20000	110	99	51	53200	13500	12600	0.206767	0.733333	0.404762	0.448287		0.265968
	100	40000	16	9	8	106400	27000	25200	0.0150376	0.0333333	0.031746	0.0267057		0.010136
rad55d sfr1-3A	0	200	154	121	109	154	121	109	100	100	100	100	rad55d sfr1-3A	0
	50	1000	136	136	106	770	605	545	17.6623	22.4793	19.4495	19.8637		2.43507
	75	5000	77	88	54	3850	3025	2725	2	2.90909	1.98165	2.29691		0.53024
	100	20000	38	46	40	15400	12100	10900	0.246753	0.380165	0.366972	0.331297		0.0735136
rad55d sfr1-4A	0	200	174	126	146	174	126	146	100	100	100	100	rad55d sfr1-4A	0
	50	1000	169	184	154	870	630	730	19.4253	29.2063	21.0959	23.2425		5.23195
	75	5000	144	107	83	4350	3150	3650	3.31034	3.39683	2.27397	2.99371		0.624813
	100	20000	132	85	60	17400	12600	14600	0.758621	0.674603	0.410959	0.614728		0.1814
rad51d	0	200	133	175	156	133	175	156	100	100	100	100	rad51d	0
	50	1000	99	103	89	665	875	780	14.8872	11.7714	11.4103	12.6896		1.91171
	75	20000	90	62	72	13300	17500	15600	0.676692	0.354286	0.461538	0.497505		0.164185
	100	20000	10	9	6	13300	17500	15600	0.075188	0.0514286	0.0384615	0.055026		0.0186256
